# Supplementary material for: Nocturnality in Dinosaurs Inferred from Scleral Ring and Orbit Morphology
Source: HighWire-hosted journal article supplement (doi:10.1126/science.1200043), 2011-04-15
Supplement: Schmitz.SOM.pdf [file Schmitz.SOM.pdf]

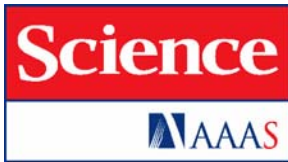

www.sciencemag.org/cgi/content/full/science.1200043/DC1

Supporting Online Material for  
**Nocturnality in Dinosaurs Inferred from Scleral Ring and Orbit  
Morphology**

Lars Schmitz\* and Ryosuke Motani

\*To whom correspondence should be addressed. E-mail: [lschmitz@ucdavis.edu](mailto:lschmitz@ucdavis.edu)

Published 14 April 2011 on *Science Express*  
DOI: 10.1126/science.1200043

**This PDF file includes:**

Materials and Methods  
SOM Text  
Figs. S1 and S2  
Tables S1 to S5  
References

## Table of Contents

|                                                                                      |           |
|--------------------------------------------------------------------------------------|-----------|
| <b>Materials and Methods</b>                                                         | <b>2</b>  |
| <b>Figure S1</b> Scatterplot of discriminant variates obtained from phylogenetic FDA | <b>4</b>  |
| <b>Figure S2</b> Phylogeny and stratigraphic range of examined Mesozoic archosaurs   | <b>5</b>  |
| <b>Table S1</b> Scleral Ring and Orbit Dimensions of Fossil Archosaurs               | <b>6</b>  |
| <b>Table S2</b> Stratigraphic Range of Examined Fossil Archosaurs                    | <b>8</b>  |
| <b>Table S3</b> Proportions of Ocular Image Formation Types                          | <b>10</b> |
| <b>Table S4</b> Types of Ocular Image Formation                                      | <b>11</b> |
| <b>Table S5</b> Paleolatitude of Examined Fossil Archosaurs                          | <b>44</b> |
| <b>Nexus File</b>                                                                    | <b>46</b> |
| <b>R Script</b> phylo.fda.R                                                          | <b>61</b> |
| <b>R Script Step-by-Step Guide</b>                                                   | <b>73</b> |
| <b>Supporting references and notes</b>                                               | <b>79</b> |

## Material and methods

**Proportions of photopic, mesopic, and scotopic amniotes in the extant biosphere:** We estimated relative proportions of ocular image formation categories (in living mammals, squamates, and birds in order to obtain prior probabilities for discriminant analysis (*S1*, *S2*). The photopic group contains species with no activity in dim light levels (diurnal and diurnal+crepuscular). The scotopic group contains species that are never active in bright light conditions (nocturnal and nocturnal+crepuscular). The mesopic group, finally, features species that cope with varying, intermediate light levels (cathemeral and crepuscular). For example, cathemeral species have extended periods of activity in dim and bright light. This can include extended periods of activity in day and night on a diel or seasonal cycle. Crepuscular species are only active in twilight conditions and experience quickly changing light levels, ranging from dim to bright. Thus, crepusculars face optical challenges similar to cathemerals.

We combined two existing data sets (*S2*, *S3*) and added data from the Animal Diversity Web (<http://animaldiversity.ummz.umich.edu/site/index.html>; extracted on Oct. 7, 2010) for a total of 1,401 species (table *S4*). We adjusted the weight of the proportions of ocular image formation of squamates, avians, and mammals by correcting for their relative species richness since uneven sampling may bias the proportions. Specifically, we multiplied the counts for each clade (squamates, avians, and mammals) with the total number of species in the respective clade. Then, we divided the sum of these three numbers by the species number of squamates, avians, and mammals combined. Similarly, we adjusted the weight of the species-rich, largely nocturnal chiropterans and geckos, sub-clades of mammals and squamates, respectively. Total species counts for avians, squamates, mammals, chiropterans, and geckos are provided in reference *S4*.

**Diel activity pattern and optics of the amniote eye:** The timing of activity during the 24h cycle exposes species to substantially different light levels: diurnal species experience bright light, whereas nocturnal species cope with very dim light. Dim environments make it very difficult to produce an image of sufficient optical quality, because the number of photons reaching the retina is low and consequently the signal-to-noise ratio decreases (*S5*). Thus, nocturnal species benefit from improved light sensitivity, and modifications of the optical system can lead to better performance. For vision in dim light, amniotes need a large aperture (i.e., the size of the fully dilated pupil), which is controlled by the iris. Sensitivity can be maximized by increasing the size of the aperture, or fully dilated pupil, and simultaneously keeping the focal length constant, resulting in a low f-number (*S2*, *S3*, *S6*). Thus, the retinal image has the same size but is much brighter. Similarly, sensitivity is improved by maximizing aperture for the given size of the retina, because more light is captured by the same number of photoreceptors, assuming everything else stays constant (*S3*). Photopic species, active in bright ambient light levels, face the opposite problem: they need to protect the retina from too much incident light. Photopics minimize the amount of light entering the eye by keeping the aperture small. As the constriction of the pupil by the iris requires energy, the null point, or the maximum pupil diameter, is smaller than in scotopic species. Another benefit from a small maximum pupil diameter is a sufficient depth of focus without the requirement to contract the iris. We have used these optical predictions to form a ratio (aperture area / [focal length \* retinal area]) that helps to delineate groups of different activity patterns, using both eye soft-tissue and hard-tissue traits as proxies for the optical variables (*S2*, *S3*). Discriminant analysis yields reliable distinction of different activity

patterns, where the multivariate axes reflect the optical ratio (axis 1) and overall eye size (axis 2) (S2, fig. S1). Coefficients of discriminant function 1, as found by phylogenetic flexible discriminant analysis at  $\lambda=0.08$ , are 0.32 for orbit length, -3.21 for external scleral ring diameter, and 4.38 for internal scleral ring diameter. Coefficients of discriminant function 2 are -5.2 for orbit length, 1.82 for external scleral ring diameter, and 3.51 for internal scleral ring diameter.

**Measurements of scleral rings and orbits in fossil archosaurs:** We measured orbit length, external, and internal scleral ring diameter of 33 Mesozoic archosaur species (table S1). In most cases we used digital calipers. However, some well-preserved specimens of the American Museum of Natural History are on display and protected by a glass-enclosing. We scanned these specimens with a NextEngine laser-scanner and measured dimensions digitally instead, because removal of the glass might damage the specimens. We supplemented these data with published dimensions, and also measured from published photographs and drawings (table S1).

**Phylogeny:** We performed phylogenetically informed discriminant analysis (pFDA) (S2) (fig. S2, see script below). The avian and squamates phylogeny is provided in reference 2. We combined previously published topologies of phylogenetic hypotheses for fossil archosaurs (S7-S10). We estimated branch lengths based on stratigraphic occurrence (extracted from Paleobiology Database Oct. 22, 2010; <http://paleodb.org/cgi-bin/bridge.pl>; table S2) and minimized the lengths of ghost lineages. When several taxa (e.g., A, B, and C, with A the sister taxon to (B, C)) had the same oldest stratigraphic appearance, we estimated the node age of the common ancestor of (A(B, C)) as one million years older than the first occurrence of A, B, and C. For branch lengths that we could not directly estimate by stratigraphic range of individual species, we assumed equal branch lengths scaled to the distance in-between the next closest node age estimates. The nexus file is provided below.

**Script for phylogenetic discriminant analysis with separate training and test datasets:** R scripts for phylogenetically informed discriminant analysis are attached to this file toward the end. There is also a step-by-step guide on how to use the scripts.

Fig. S1

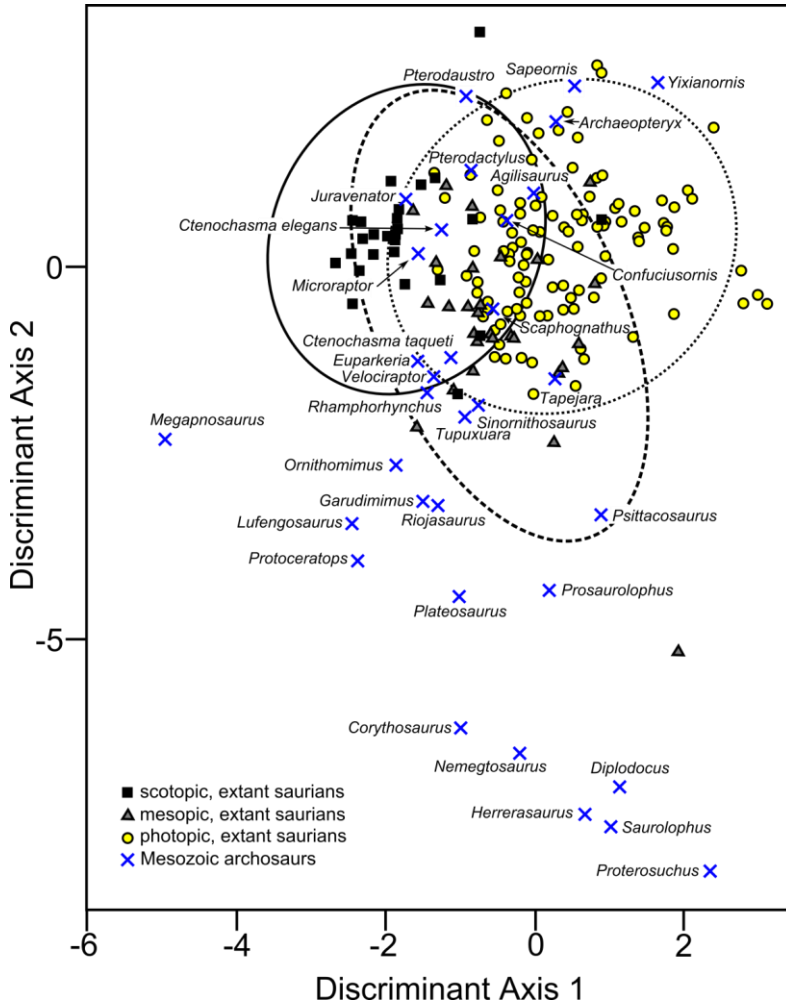

**Fig. S1.** Scatterplot of discriminant variates obtained from phylogenetic FDA. Discriminant axis 1 reflects the optical ratio, whereas scores on discriminant axis 2 are influenced by eye size. We plotted 95% confidence ellipses for each group of activity pattern as very approximate guidelines to help visualize the scatter of each pattern. These ellipses are not accurate representations of the discriminant method used.

Fig. S2

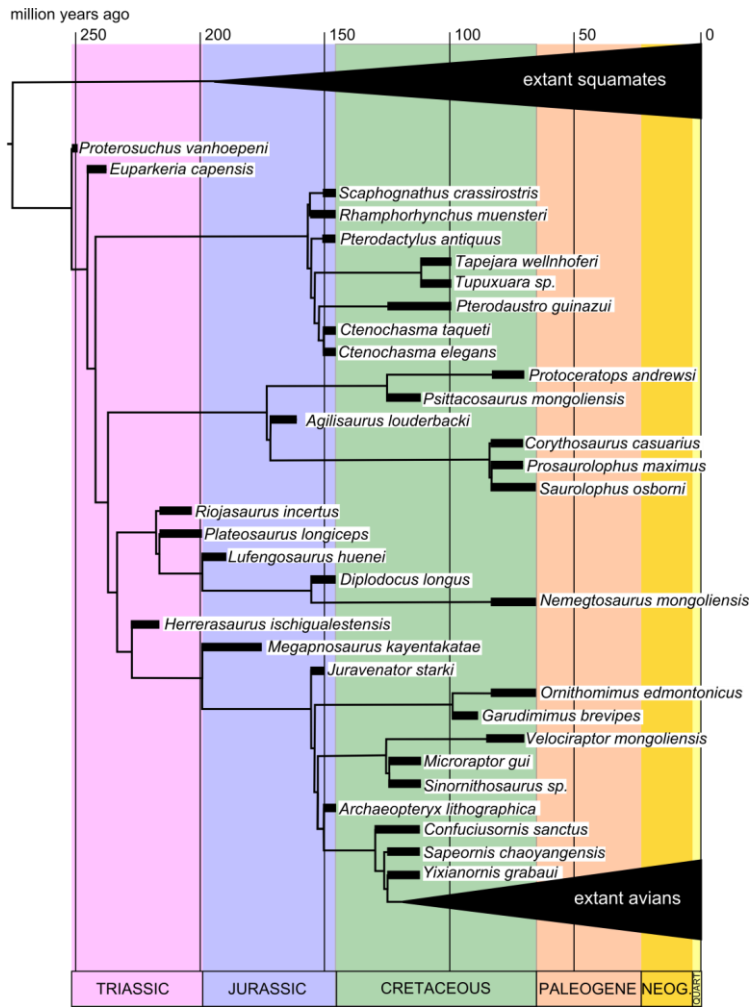

Fig. S2. Phylogeny and stratigraphic range of examined Mesozoic archosaurs. Neog., Neogene; Quart., Quaternary.

Table S1: Scleral Ring and Orbit Dimensions of Fossil Archosaurs

| all dimensions in [mm]                   | OL    | EXT   | INT   | collection #, reference                                                  |
|------------------------------------------|-------|-------|-------|--------------------------------------------------------------------------|
| <b><u>Basal archosaurs</u></b>           |       |       |       |                                                                          |
| <i>Euparkeria capensis</i>               | 21.1  | 14.35 | 8.82  | AMNH FR 29975 (cast)                                                     |
| <i>Proterosuchus vanhoepeni</i>          | 50    | 26.3  | 13.5  | reference <i>S11</i> *                                                   |
| <b><u>Pterosaurs</u></b>                 |       |       |       |                                                                          |
| <i>Ctenochasma elegans</i>               | 9.97  | 6.82  | 5.14  | ROM 52425                                                                |
| <i>Ctenochasma taqueti</i>               | 27    | 18.9  | 11.5  | reference <i>S12</i> *                                                   |
| <i>Pterodactylus antiquus</i> **         | 12.35 | 9.56  | 5.84  | BSP 1961 I 186, BSP AS V 29, BSP 1969 I 82, BSP AS XIX 3, BSP 1883 XVI I |
| <i>Pterodaustro guinazui</i>             | 14    | 13.45 | 6.73  | AMNH FR 21483 (cast)                                                     |
| <i>Rhamphorhynchus muensteri</i> **      | 25.15 | 16.7  | 11.29 | JME SOS 2819, BSP 1867 II 2                                              |
| <i>Scaphognathus crassirostris</i>       | 25    | 18    | 10    | Goldfuss Museum Bonn 1304                                                |
| <i>Tapejara wellnhoferi</i>              | 28.8  | 17.53 | 9.81  | AMNH FR 24440                                                            |
| <i>Tupuxuara</i> sp.                     | 43.25 | 29.5  | 16.7  | BSP 1993 I 31                                                            |
| <b><u>Ornithischian dinosaurs</u></b>    |       |       |       |                                                                          |
| <i>Agilisaurus louderbacki</i>           | 32    | 26.5  | 11.3  | reference <i>S13</i> *, EXT given in text                                |
| <i>Corythosaurus casuarius</i>           | 146   | 63.2  | 45    | AMNH FR 5338                                                             |
| <i>Prosaurolophus maximus</i>            | 148   | 77.6  | 37.4  | AMNH FR 5386                                                             |
| <i>Protoceratops andrewsi</i>            | 93    | 59    | 40.5  | AMNH FR 6466, reference <i>S14</i> (OL)                                  |
| <i>Psittacosaurus mongoliensis</i>       | 40.2  | 18.7  | 11.52 | AMNH FR 6254                                                             |
| <i>Saurolophus osborni</i>               | 269   | 92.6  | 51.7  | AMNH FR 5220                                                             |
| <b><u>Basal saurischian dinosaur</u></b> |       |       |       |                                                                          |
| <i>Herrerasaurus ischigualastensis</i>   | 69.3  | 33.94 | 19.77 | reference <i>S15</i> , UCMP 177287, V98119                               |
| <b><u>Sauropodomorph dinosaurs</u></b>   |       |       |       |                                                                          |
| <i>Diplodocus longus</i>                 | 148   | 63    | 33    | ROM (cast) , reference <i>S16</i> (EXT and INT)                          |
| <i>Lufengosaurus huenei</i>              | 63    | 45    | 26    | reference <i>S17</i> *                                                   |
| <i>Nemegtosaurus mongoliensis</i>        | 205   | 88    | 52.2  | reference <i>S18</i> *                                                   |
| <i>Plateosaurus longiceps</i>            | 75    | 48.45 | 25.2  | AMNH FR 6810, reference <i>S19</i> * (OL)                                |
| <i>Riojasaurus incertus</i>              | 67    | 48.3  | 23.8  | reference <i>S20</i>                                                     |
| <b><u>Non-avian theropods</u></b>        |       |       |       |                                                                          |
| <i>Garudimimus brevipes</i>              | 61.9  | 41.2  | 26.8  | reference <i>S21</i>                                                     |
| <i>Juravenator starki</i>                | 18.11 | 15.78 | 9.75  | JME Sch 200                                                              |
| <i>Megapnosaurus kayentakatae</i>        | 52    | 47.3  | 32.4  | CSU Sacramento, Department of Geology, Teaching Collection (cast)        |
| <i>Microraptor gui</i>                   | 19.7  | 16.2  | 10.5  | IVPP V 13352*                                                            |

|                                  |       |       |       |                                                                |
|----------------------------------|-------|-------|-------|----------------------------------------------------------------|
| <i>Ornithomimus edmontonicus</i> | 67    | 49.55 | 31.1  | AMNH FR 6819                                                   |
| <i>Sinornithosaurus</i> sp.      | 30.3  | 19.74 | 13.09 | AMNH FARB 30577                                                |
| <i>Velociraptor mongoliensis</i> | 39.83 | 30.2  | 18.56 | UC Davis, Department of Geology,<br>Teaching Collection (cast) |

**Avians**

|                                    |       |       |      |                                |
|------------------------------------|-------|-------|------|--------------------------------|
| <i>Archaeopteryx lithographica</i> | 14    | 11.5  | 6    | Berlin specimen, HMN 1880/1881 |
| <i>Confuciusornis sanctus</i>      | 18    | 14.31 | 8.23 | BSP 2000 I 5                   |
| <i>Sapeornis chaoyangensis</i>     | 15.84 | 14.64 | 6.5  | IVPP V 13396                   |
| <i>Yixianornis grabaui</i>         | 10.65 | 8.31  | 3.9  | IVPP V 12631                   |

\* measured from figure/photograph

\*\* species average

Abbreviations: EXT, external scleral ring diameter; INT, internal scleral ring diameter; OL, orbit length.

Institutional Abbreviations: AMNH, American Museum of Natural History; BSP, Bayerische Staatssammlung für Paläontologie; CSU, California State University; HMN, Humboldt Museum für Naturkunde Berlin; IVPP, Institute of Vertebrate Paleontology and Paleoanthropology; JME, Jura-Museum Eichstätt; ROM, Royal Ontario Museum Toronto; UC, University of California; UCMP, University of California Museum of Paleontology.



Table S2: Stratigraphic Range of Examined Fossil Archosaurs

| in [million years]                       | from  | to    |
|------------------------------------------|-------|-------|
| <b><u>Basal archosaurs</u></b>           |       |       |
| <i>Euparkeria capensis</i>               | 245   | 237   |
| <i>Proterosuchus vanhoepeni</i>          | 251   | 249.7 |
| <b><u>Pterosaurs</u></b>                 |       |       |
| <i>Ctenochasma elegans</i>               | 150.8 | 145.5 |
| <i>Ctenochasma taqueti</i>               | 150.8 | 145.5 |
| <i>Pterodactylus antiquus</i>            | 150.8 | 145.5 |
| <i>Pterodaustro guinazui</i>             | 125   | 99.6  |
| <i>Rhamphorhynchus muensteri</i>         | 155.7 | 145.5 |
| <i>Scaphognathus crassirostris</i>       | 150.8 | 145.5 |
| <i>Tapejara wellnhoferi</i>              | 112   | 99.6  |
| <i>Tupixuara</i> sp.                     | 112   | 99.6  |
| <b><u>Ornithischian dinosaurs</u></b>    |       |       |
| <i>Agilisaurus louderbacki</i>           | 171.6 | 161.2 |
| <i>Corythosaurus casuarius</i>           | 83.5  | 70.6  |
| <i>Prosaurolophus maximus</i>            | 83.5  | 70.6  |
| <i>Protoceratops andrewsi</i>            | 83.5  | 70.6  |
| <i>Psittacosaurus mongoliensis</i>       | 125   | 112   |
| <i>Saurolophus osborni</i>               | 83.5  | 65.5  |
| <b><u>Basal saurischian dinosaur</u></b> |       |       |
| <i>Herrerasaurus ischigualastensis</i>   | 228   | 216.5 |
| <b><u>Sauropodomorph dinosaurs</u></b>   |       |       |
| <i>Diplodocus longus</i>                 | 155.7 | 145.5 |
| <i>Lufengosaurus huenei</i>              | 199.6 | 189.6 |
| <i>Nemegtosaurus mongoliensis</i>        | 83.5  | 65.5  |
| <i>Plateosaurus longiceps</i>            | 216.5 | 199.6 |
| <i>Riojasaurus incertus</i>              | 216.5 | 203.6 |
| <b><u>Non-avian theropods</u></b>        |       |       |
| <i>Garudimimus brevipes</i>              | 99.6  | 89.3  |
| <i>Juravenator starki</i>                | 155.7 | 150.8 |
| <i>Megapnosaurus kayentakatae</i>        | 199.6 | 175.6 |
| <i>Microaptor gui</i>                    | 125   | 112   |
| <i>Ornithomimus edmontonicus</i>         | 83.5  | 65.5  |
| <i>Sinornithosaurus</i> sp.              | 125   | 112   |
| <i>Velociraptor mongoliensis</i>         | 85.8  | 70.6  |

**Avians**

|                                    |       |       |
|------------------------------------|-------|-------|
| <i>Archaeopteryx lithographica</i> | 150.8 | 145.5 |
| <i>Confuciusornis sanctus</i>      | 130   | 112   |
| <i>Sapeornis chaoyangensis</i>     | 125   | 112   |
| <i>Yixianornis grabaui</i>         | 125   | 112   |

---

Table S3: Estimates of the Proportions of Ocular Image Formation Types in Extant Avians, Squamates, and Mammals

|                | mesopic | photopic | scotopic |
|----------------|---------|----------|----------|
| Avians         | 41      | 301      | 33       |
| Squamates      | 12      | 73       | 23       |
| Mammals        | 156     | 276      | 486      |
| All            | 209     | 650      | 542      |
| in %, adjusted | 14.4    | 58.5     | 27.1     |
| Flyer          | 45      | 304      | 146      |
| in %, adjusted | 10.7    | 77.5     | 11.8     |
| Terrestrial    | 164     | 346      | 396      |
| in %, adjusted | 17.3    | 41.4     | 41.3     |

Table S4: Types of Ocular Image Formation in Extant Squamates, Avians, and Mammals

|                                    | clade     | OIF      | source |
|------------------------------------|-----------|----------|--------|
| <i>Agkistrodon piscivorus</i>      | squamates | scotopic | ADW    |
| <i>Accipiter cooperii</i>          | avians    | photopic | ADW    |
| <i>Accipiter gentilis</i>          | avians    | photopic | S2     |
| <i>Accipiter striatus</i>          | avians    | photopic | S2     |
| <i>Acerodon jubatus</i>            | mammals   | scotopic | ADW    |
| <i>Aconaemys fuscus</i>            | mammals   | scotopic | ADW    |
| <i>Acridotheres tristis</i>        | avians    | photopic | ADW    |
| <i>Acrocephalus arundinaceus</i>   | avians    | photopic | ADW    |
| <i>Actitis macularius</i>          | avians    | photopic | ADW    |
| <i>Addax nasomaculatus</i>         | mammals   | photopic | ADW    |
| <i>Aegithalos caudatus</i>         | avians    | photopic | ADW    |
| <i>Aegolius acadicus</i>           | avians    | scotopic | S2     |
| <i>Aegolius funereus</i>           | avians    | scotopic | ADW    |
| <i>Aegotheles cristatus</i>        | avians    | scotopic | S2     |
| <i>Aepyceros melampus</i>          | mammals   | photopic | ADW    |
| <i>Aethia cristatella</i>          | avians    | photopic | ADW    |
| <i>Agapornis roseicollis</i>       | avians    | photopic | ADW    |
| <i>Agelaius phoeniceus</i>         | avians    | photopic | ADW    |
| <i>Ailuroedus crassirostris</i>    | avians    | photopic | ADW    |
| <i>Ailuropoda melanoleuca</i>      | mammals   | scotopic | ADW    |
| <i>Ailurus fulgens</i>             | mammals   | scotopic | ADW    |
| <i>Aimophila aestivalis</i>        | avians    | photopic | ADW    |
| <i>Aimophila ruficeps</i>          | avians    | photopic | ADW    |
| <i>Aix sponsa</i>                  | avians    | mesopic  | S2     |
| <i>Akodon azarae</i>               | mammals   | mesopic  | ADW    |
| <i>Akodon philipmyersi</i>         | mammals   | scotopic | ADW    |
| <i>Alauda arvensis</i>             | avians    | photopic | ADW    |
| <i>Alcedo atthis</i>               | avians    | photopic | ADW    |
| <i>Alces alces</i>                 | mammals   | mesopic  | S3     |
| <i>Alectoris chukar</i>            | avians    | photopic | ADW    |
| <i>Alethe choloensis</i>           | avians    | photopic | ADW    |
| <i>Allactaga euphratica</i>        | mammals   | scotopic | ADW    |
| <i>Allactodipus bobrinskii</i>     | mammals   | scotopic | ADW    |
| <i>Alle alle</i>                   | avians    | photopic | ADW    |
| <i>Allenopithecus nigroviridis</i> | mammals   | photopic | ADW    |
| <i>Allocebus trichotis</i>         | mammals   | scotopic | ADW    |
| <i>Alopochen aegyptiaca</i>        | avians    | photopic | ADW    |
| <i>Alouatta belzebul</i>           | mammals   | photopic | ADW    |
| <i>Alouatta caraya</i>             | mammals   | photopic | ADW    |
| <i>Alouatta guariba</i>            | mammals   | photopic | ADW    |

|                                   |           |          |     |
|-----------------------------------|-----------|----------|-----|
| <i>Alouatta pigra</i>             | mammals   | photopic | ADW |
| <i>Alouatta seniculus</i>         | mammals   | photopic | ADW |
| <i>Amandava amandava</i>          | avians    | photopic | ADW |
| <i>Amazilia tzacatl</i>           | avians    | photopic | ADW |
| <i>Amazona farinosa</i>           | avians    | photopic | ADW |
| <i>Amazona ochrocephala</i>       | avians    | photopic | ADW |
| <i>Amblysomus hottentotus</i>     | mammals   | mesopic  | ADW |
| <i>Ameiva ameiva</i>              | squamates | photopic | S2  |
| <i>Ammodramus savannarum</i>      | avians    | photopic | ADW |
| <i>Ammotragus lervia</i>          | mammals   | mesopic  | S3  |
| <i>Amorphochilus schnablii</i>    | mammals   | scotopic | ADW |
| <i>Anas acuta</i>                 | avians    | mesopic  | S2  |
| <i>Anas americana</i>             | avians    | mesopic  | S2  |
| <i>Anas discors</i>               | avians    | photopic | ADW |
| <i>Anas fulvigula</i>             | avians    | photopic | ADW |
| <i>Anas platyrhynchos</i>         | avians    | mesopic  | S2  |
| <i>Anas strepera</i>              | avians    | photopic | S2  |
| <i>Anhima cornuta</i>             | avians    | photopic | ADW |
| <i>Anhinga anhinga</i>            | avians    | photopic | ADW |
| <i>Anodorhynchus hyacinthinus</i> | avians    | photopic | ADW |
| <i>Anolis carolinensis</i>        | squamates | photopic | S2  |
| <i>Anolis equestris</i>           | squamates | photopic | ADW |
| <i>Anolis sagrei</i>              | squamates | photopic | S2  |
| <i>Anomalurus beecrofti</i>       | mammals   | scotopic | ADW |
| <i>Anomalurus pusillus</i>        | mammals   | scotopic | ADW |
| <i>Anoura geoffroyi</i>           | mammals   | scotopic | ADW |
| <i>Anous minutus</i>              | avians    | photopic | ADW |
| <i>Anseranas semipalmata</i>      | avians    | photopic | ADW |
| <i>Antechinus swainsonii</i>      | mammals   | scotopic | ADW |
| <i>Anthropoides virgo</i>         | avians    | photopic | ADW |
| <i>Anthus cervinus</i>            | avians    | photopic | ADW |
| <i>Anthus spragueii</i>           | avians    | photopic | ADW |
| <i>Antilocapra americana</i>      | mammals   | mesopic  | ADW |
| <i>Antilope cervicapra</i>        | mammals   | mesopic  | S3  |
| <i>Antrozous pallidus</i>         | mammals   | scotopic | ADW |
| <i>Aonyx capensis congica</i>     | mammals   | scotopic | ADW |
| <i>Aonyx cinerea</i>              | mammals   | photopic | ADW |
| <i>Aotus azarae</i>               | mammals   | scotopic | ADW |
| <i>Aotus lemurinus</i>            | mammals   | scotopic | ADW |
| <i>Aotus nancymaae</i>            | mammals   | scotopic | ADW |
| <i>Aotus nigriceps</i>            | mammals   | scotopic | ADW |
| <i>Aotus trivirgatus</i>          | mammals   | scotopic | ADW |
| <i>Aphelocoma coerulescens</i>    | avians    | photopic | ADW |

|                                 |           |          |     |
|---------------------------------|-----------|----------|-----|
| <i>Aphelocorna californica</i>  | avians    | photopic | S2  |
| <i>Aptenodytes patagonicus</i>  | avians    | photopic | ADW |
| <i>Apteryx australis</i>        | avians    | scotopic | ADW |
| <i>Apus apus</i>                | avians    | mesopic  | S2  |
| <i>Aquila audax</i>             | avians    | mesopic  | S2  |
| <i>Aquila chrysaetos</i>        | avians    | mesopic  | S2  |
| <i>Aquila clanga</i>            | avians    | photopic | ADW |
| <i>Aquila rapax</i>             | avians    | photopic | ADW |
| <i>Arborimus longicaudus</i>    | mammals   | scotopic | ADW |
| <i>Archilochus colubris</i>     | avians    | photopic | ADW |
| <i>Arctocebus calabarensis</i>  | mammals   | scotopic | ADW |
| <i>Arctcephalus australis</i>   | mammals   | scotopic | ADW |
| <i>Arctonyx collaris</i>        | mammals   | scotopic | ADW |
| <i>Ardea alba</i>               | avians    | photopic | ADW |
| <i>Ardea herodias</i>           | avians    | mesopic  | S2  |
| <i>Ardeotis kori</i>            | avians    | photopic | ADW |
| <i>Arenaria interpres</i>       | avians    | photopic | ADW |
| <i>Arvicanthus niloticus</i>    | mammals   | photopic | ADW |
| <i>Arvicola amphibius</i>       | mammals   | mesopic  | ADW |
| <i>Asellia tridens</i>          | mammals   | scotopic | ADW |
| <i>Asio flammeus</i>            | avians    | scotopic | ADW |
| <i>Asio otus</i>                | avians    | scotopic | S2  |
| <i>Asturina nitida</i>          | avians    | photopic | S2  |
| <i>Atelerix frontalis</i>       | mammals   | scotopic | ADW |
| <i>Ateles belzebuth</i>         | mammals   | photopic | ADW |
| <i>Ateles fusciceps</i>         | mammals   | photopic | ADW |
| <i>Ateles geoffroyi</i>         | mammals   | photopic | ADW |
| <i>Ateles hybridus</i>          | mammals   | photopic | ADW |
| <i>Atelocynus microtis</i>      | mammals   | mesopic  | ADW |
| <i>Athene cucularia</i>         | avians    | mesopic  | S3  |
| <i>Atherurus macrourus</i>      | mammals   | scotopic | ADW |
| <i>Avahi laniger</i>            | mammals   | scotopic | ADW |
| <i>Aviceda madagascariensis</i> | avians    | photopic | ADW |
| <i>Axis axis</i>                | mammals   | photopic | ADW |
| <i>Axis porcinus</i>            | mammals   | scotopic | ADW |
| <i>Aythya affinis</i>           | avians    | photopic | ADW |
| <i>Aythya valisineria</i>       | avians    | photopic | ADW |
| <i>Balaeniceps rex</i>          | avians    | photopic | ADW |
| <i>Balaenoptera physalus</i>    | mammals   | mesopic  | ADW |
| <i>Balionycteris maculata</i>   | mammals   | mesopic  | ADW |
| <i>Basiliscus basiliscus</i>    | squamates | photopic | S2  |
| <i>Basiliscus vittatus</i>      | squamates | photopic | S2  |
| <i>Bassaricyon gabbii</i>       | mammals   | scotopic | ADW |

|                                 |           |          |     |
|---------------------------------|-----------|----------|-----|
| <i>Bassariscus astutus</i>      | mammals   | scotopic | ADW |
| <i>Bdeogale nigripes</i>        | mammals   | scotopic | ADW |
| <i>Beatragus hunteri</i>        | mammals   | mesopic  | ADW |
| <i>Bettongia gaimardi</i>       | mammals   | scotopic | ADW |
| <i>Bettongia lesueur</i>        | mammals   | scotopic | ADW |
| <i>Bison bison</i>              | mammals   | photopic | ADW |
| <i>Bison bonasus</i>            | mammals   | mesopic  | S3  |
| <i>Bitis gabonica</i>           | squamates | scotopic | ADW |
| <i>Blarina brevicauda</i>       | mammals   | mesopic  | ADW |
| <i>Blarina carolinensis</i>     | mammals   | scotopic | ADW |
| <i>Blarina hylophaga</i>        | mammals   | scotopic | ADW |
| <i>Boa constrictor</i>          | squamates | scotopic | ADW |
| <i>Bombycilla cedrorum</i>      | avians    | photopic | ADW |
| <i>Bombycilla garrulus</i>      | avians    | photopic | ADW |
| <i>Bos gaurus</i>               | mammals   | mesopic  | S3  |
| <i>Bos javanicus</i>            | mammals   | mesopic  | S3  |
| <i>Bos sauveli</i>              | mammals   | scotopic | ADW |
| <i>Bos taurus</i>               | mammals   | photopic | ADW |
| <i>Brachylagus idahoensis</i>   | mammals   | photopic | ADW |
| <i>Brachytarsomys albicauda</i> | mammals   | scotopic | ADW |
| <i>Bradypodion fischeri</i>     | squamates | photopic | S3  |
| <i>Bradypus torquatus</i>       | mammals   | mesopic  | ADW |
| <i>Branta canadensis</i>        | avians    | photopic | ADW |
| <i>Branta sandvicensis</i>      | avians    | photopic | ADW |
| <i>Bubalus bubalis</i>          | mammals   | mesopic  | ADW |
| <i>Bubalus mindorensis</i>      | mammals   | scotopic | ADW |
| <i>Bubalus quarlesi</i>         | mammals   | photopic | ADW |
| <i>Bubo bubo</i>                | avians    | scotopic | S2  |
| <i>Bubulcus ibis</i>            | avians    | photopic | S2  |
| <i>Bucephala clangula</i>       | avians    | photopic | ADW |
| <i>Bucorvus abyssinicus</i>     | avians    | photopic | ADW |
| <i>Budorcas taxicolor</i>       | mammals   | mesopic  | S3  |
| <i>Bunolagus monticularis</i>   | mammals   | scotopic | ADW |
| <i>Bunopithecus hoolock</i>     | mammals   | photopic | ADW |
| <i>Buteo brachyurus</i>         | avians    | photopic | ADW |
| <i>Buteo buteo</i>              | avians    | photopic | S2  |
| <i>Buteo jamaicensis</i>        | avians    | photopic | S2  |
| <i>Buteo lagopus</i>            | avians    | photopic | ADW |
| <i>Buteo lineatus</i>           | avians    | photopic | ADW |
| <i>Buteo platypterus</i>        | avians    | photopic | ADW |
| <i>Buteo regalis</i>            | avians    | mesopic  | S2  |
| <i>Buteo swainsoni</i>          | avians    | photopic | S2  |
| <i>Butorides sundevalli</i>     | avians    | photopic | ADW |

|                                  |         |          |     |
|----------------------------------|---------|----------|-----|
| <i>Butorides virescens</i>       | avians  | photopic | ADW |
| <i>Bycanistes subcylindricus</i> | avians  | photopic | ADW |
| <i>Cabassous tatouay</i>         | mammals | scotopic | ADW |
| <i>Cacajao calvus</i>            | mammals | photopic | ADW |
| <i>Cacajao melanocephalus</i>    | mammals | photopic | ADW |
| <i>Cacatua alba</i>              | avians  | photopic | ADW |
| <i>Cacatua galerita</i>          | avians  | photopic | ADW |
| <i>Caenolestes fuliginosus</i>   | mammals | scotopic | ADW |
| <i>Calidris alba</i>             | avians  | photopic | ADW |
| <i>Callicebus cupreus</i>        | mammals | photopic | ADW |
| <i>Callicebus moloch</i>         | mammals | photopic | ADW |
| <i>Callicebus personatus</i>     | mammals | photopic | ADW |
| <i>Callicebus torquatus</i>      | mammals | photopic | ADW |
| <i>Callipepla californica</i>    | avians  | photopic | S2  |
| <i>Callipepla gambeli</i>        | avians  | photopic | S2  |
| <i>Callithrix argentata</i>      | mammals | photopic | ADW |
| <i>Callithrix chrysoleuca</i>    | mammals | photopic | ADW |
| <i>Callithrix jacchus</i>        | mammals | photopic | ADW |
| <i>Callithrix kuhlii</i>         | mammals | photopic | ADW |
| <i>Callithrix penicillata</i>    | mammals | photopic | ADW |
| <i>Callithrix pygmaea</i>        | mammals | photopic | ADW |
| <i>Callorhinus ursinus</i>       | mammals | mesopic  | ADW |
| <i>Callosciurus erythraeus</i>   | mammals | photopic | ADW |
| <i>Callosciurus notatus</i>      | mammals | photopic | ADW |
| <i>Callosciurus prevostii</i>    | mammals | mesopic  | ADW |
| <i>Calomyscus bailwardi</i>      | mammals | mesopic  | ADW |
| <i>Caluromys philander</i>       | mammals | scotopic | ADW |
| <i>Calypte anna</i>              | avians  | photopic | S2  |
| <i>Calyptopractus retusus</i>    | mammals | scotopic | ADW |
| <i>Camelus bactrianus</i>        | mammals | photopic | ADW |
| <i>Camelus dromedarius</i>       | mammals | photopic | ADW |
| <i>Campephilus principalis</i>   | avians  | photopic | ADW |
| <i>Canis adustus</i>             | mammals | scotopic | ADW |
| <i>Canis aureus</i>              | mammals | mesopic  | ADW |
| <i>Canis familiaris</i>          | mammals | mesopic  | S3  |
| <i>Canis latrans</i>             | mammals | scotopic | ADW |
| <i>Canis lupus</i>               | mammals | mesopic  | ADW |
| <i>Canis lupus dingo</i>         | mammals | scotopic | ADW |
| <i>Canis lupus familiaris</i>    | mammals | mesopic  | ADW |
| <i>Canis mesomelas</i>           | mammals | mesopic  | ADW |
| <i>Canis rufus</i>               | mammals | scotopic | ADW |
| <i>Canis simensis</i>            | mammals | mesopic  | ADW |
| <i>Capra caucasica</i>           | mammals | mesopic  | S3  |



|                                    |         |          |     |
|------------------------------------|---------|----------|-----|
| <i>Capra cylindricornis</i>        | mammals | mesopic  | S3  |
| <i>Capra falconeri</i>             | mammals | photopic | ADW |
| <i>Capra hircus</i>                | mammals | photopic | ADW |
| <i>Capra ibex</i>                  | mammals | photopic | ADW |
| <i>Capra nubiana</i>               | mammals | mesopic  | ADW |
| <i>Capra sibirica</i>              | mammals | photopic | ADW |
| <i>Capra walie</i>                 | mammals | mesopic  | ADW |
| <i>Capricornis crispus</i>         | mammals | mesopic  | ADW |
| <i>Caprimulgus carolinensis</i>    | avians  | mesopic  | S2  |
| <i>Caprimulgus europaeus</i>       | avians  | scotopic | S3  |
| <i>Caprimulgus ridgwayi</i>        | avians  | scotopic | S2  |
| <i>Caprimulgus rufigena</i>        | avians  | scotopic | S2  |
| <i>Caprimulgus vociferus</i>       | avians  | scotopic | S2  |
| <i>Caprolagus hispidus</i>         | mammals | scotopic | ADW |
| <i>Caracal caracal</i>             | mammals | scotopic | ADW |
| <i>Cardinalis cardinalis</i>       | avians  | photopic | ADW |
| <i>Cardiocranius paradoxus</i>     | mammals | scotopic | ADW |
| <i>Cardioderma cor</i>             | mammals | scotopic | ADW |
| <i>Carduelis tristis</i>           | avians  | photopic | ADW |
| <i>Carpodacus mexicanus</i>        | avians  | photopic | ADW |
| <i>Carpodacus purpureus</i>        | avians  | photopic | S2  |
| <i>Castor canadensis</i>           | mammals | scotopic | ADW |
| <i>Castor fiber</i>                | mammals | scotopic | ADW |
| <i>Casuarius bennetti</i>          | avians  | photopic | ADW |
| <i>Casuarius casuarius</i>         | avians  | photopic | ADW |
| <i>Cathartes aura</i>              | avians  | photopic | S2  |
| <i>Catharus guttatus</i>           | avians  | photopic | S2  |
| <i>Catharus ustulatus</i>          | avians  | photopic | S2  |
| <i>Catoptrophorus semipalmatus</i> | avians  | mesopic  | S2  |
| <i>Catopuma badia</i>              | mammals | scotopic | ADW |
| <i>Catopuma temminckii</i>         | mammals | scotopic | ADW |
| <i>Cebus apella</i>                | mammals | photopic | ADW |
| <i>Cebus capucinus</i>             | mammals | photopic | ADW |
| <i>Cebus xanthosternos</i>         | mammals | photopic | ADW |
| <i>Centurio senex</i>              | mammals | scotopic | ADW |
| <i>Cephalophus niger</i>           | mammals | scotopic | ADW |
| <i>Cephalophus rufilatus</i>       | mammals | photopic | ADW |
| <i>Cephalophus silvicultor</i>     | mammals | scotopic | ADW |
| <i>Cercartetus concinnus</i>       | mammals | scotopic | ADW |
| <i>Cercocebus agilis</i>           | mammals | photopic | ADW |
| <i>Cercopithecus ascanius</i>      | mammals | photopic | ADW |
| <i>Cercopithecus cephus</i>        | mammals | photopic | ADW |
| <i>Cercopithecus diana</i>         | mammals | photopic | ADW |

|                                 |           |          |     |
|---------------------------------|-----------|----------|-----|
| <i>Cercopithecus hamlyni</i>    | mammals   | photopic | ADW |
| <i>Cercopithecus mitis</i>      | mammals   | photopic | ADW |
| <i>Cercopithecus mona</i>       | mammals   | photopic | ADW |
| <i>Cercopithecus neglectus</i>  | mammals   | photopic | ADW |
| <i>Cercopithecus sclateri</i>   | mammals   | photopic | ADW |
| <i>Cercopithecus wolffi</i>     | mammals   | photopic | ADW |
| <i>Cerdocyon thous</i>          | mammals   | scotopic | ADW |
| <i>Certhia americana</i>        | avians    | photopic | ADW |
| <i>Cervus elaphus</i>           | mammals   | mesopic  | S3  |
| <i>Cervus nippon</i>            | mammals   | scotopic | ADW |
| <i>Ceryle rudis</i>             | avians    | photopic | ADW |
| <i>Cetartiodactyla</i>          | mammals   | mesopic  | ADW |
| <i>Chaerephon pumilus</i>       | mammals   | scotopic | ADW |
| <i>Chaetodipus baileyi</i>      | mammals   | scotopic | ADW |
| <i>Chaetodipus californicus</i> | mammals   | scotopic | ADW |
| <i>Chaetodipus fallax</i>       | mammals   | scotopic | ADW |
| <i>Chaetodipus formosus</i>     | mammals   | scotopic | ADW |
| <i>Chaetodipus nelsoni</i>      | mammals   | scotopic | ADW |
| <i>Chaetomys subspinosus</i>    | mammals   | scotopic | ADW |
| <i>Chaetophractus nationi</i>   | mammals   | scotopic | ADW |
| <i>Chaetophractus villosus</i>  | mammals   | mesopic  | ADW |
| <i>Chaetura pelagica</i>        | avians    | photopic | S2  |
| <i>Chalcophaps indica</i>       | avians    | photopic | S3  |
| <i>Chamaeleo calypttratus</i>   | squamates | photopic | S2  |
| <i>Chamaeleo dilepsi</i>        | squamates | photopic | S3  |
| <i>Chamaeleo vulgaris</i>       | squamates | photopic | S2  |
| <i>Charadrius pecuarius</i>     | avians    | photopic | ADW |
| <i>Charadrius vociferus</i>     | avians    | mesopic  | S2  |
| <i>Charina trivirgata</i>       | squamates | mesopic  | ADW |
| <i>Cheirogaleus major</i>       | mammals   | scotopic | ADW |
| <i>Cheirogaleus medius</i>      | mammals   | scotopic | ADW |
| <i>Cheiromeles torquatus</i>    | mammals   | scotopic | ADW |
| <i>Chilonatalus micropus</i>    | mammals   | scotopic | ADW |
| <i>Chilonatalus tumidifrons</i> | mammals   | scotopic | ADW |
| <i>Chinchilla chinchilla</i>    | mammals   | scotopic | ADW |
| <i>Chiropotes satanas</i>       | mammals   | photopic | ADW |
| <i>Chlamydosaurus kingii</i>    | squamates | photopic | S3  |
| <i>Chlorocebus aethiops</i>     | mammals   | photopic | ADW |
| <i>Chlorophanes spiza</i>       | avians    | photopic | S3  |
| <i>Choeronycteris mexicana</i>  | mammals   | scotopic | ADW |
| <i>Choloepus didactylus</i>     | mammals   | scotopic | ADW |
| <i>Choloepus hoffmanni</i>      | mammals   | scotopic | ADW |
| <i>Chordeiles acutipennis</i>   | avians    | mesopic  | S2  |

|                                        |           |          |     |
|----------------------------------------|-----------|----------|-----|
| <i>Chordeiles minor</i>                | avians    | mesopic  | S2  |
| <i>Chrotogale owstoni</i>              | mammals   | scotopic | ADW |
| <i>Chrotopterus auritus</i>            | mammals   | scotopic | ADW |
| <i>Chrysocyon brachyurus</i>           | mammals   | scotopic | ADW |
| <i>Chrysolophus pictus</i>             | avians    | photopic | S2  |
| <i>Chrysospalax trevelyani</i>         | mammals   | scotopic | ADW |
| <i>Ciccaba nigrolineata</i>            | avians    | scotopic | ADW |
| <i>Ciconia ciconia</i>                 | avians    | photopic | ADW |
| <i>Ciconia nigra</i>                   | avians    | photopic | ADW |
| <i>Cinclus cinclus</i>                 | avians    | photopic | ADW |
| <i>Circus cyaneus</i>                  | avians    | photopic | ADW |
| <i>Cistothorus platensis</i>           | avians    | photopic | ADW |
| <i>Cnemidophorus tigris</i>            | squamates | photopic | S2  |
| <i>Coccythraustes vespertinus</i>      | avians    | photopic | S2  |
| <i>Coccyzus americanus</i>             | avians    | photopic | S2  |
| <i>Coccyzus erythrophthalmus</i>       | avians    | photopic | ADW |
| <i>Colaptes auratus</i>                | avians    | photopic | ADW |
| <i>Coleonyx brevis</i>                 | squamates | scotopic | ADW |
| <i>Colinus virginianus</i>             | avians    | photopic | ADW |
| <i>Colobus guereza</i>                 | mammals   | photopic | ADW |
| <i>Colobus polykomos</i>               | mammals   | photopic | ADW |
| <i>Colobus vellerosus</i>              | mammals   | photopic | ADW |
| <i>Coluber constrictor</i>             | squamates | photopic | ADW |
| <i>Condylura cristata</i>              | mammals   | mesopic  | ADW |
| <i>Conepatus chinga</i>                | mammals   | scotopic | ADW |
| <i>Conepatus humboldtii</i>            | mammals   | scotopic | ADW |
| <i>Conepatus leuconotus leuconotus</i> | mammals   | scotopic | ADW |
| <i>Conepatus semistriatus</i>          | mammals   | scotopic | ADW |
| <i>Connochaetes gnou</i>               | mammals   | photopic | ADW |
| <i>Contopus sordidulus</i>             | avians    | photopic | ADW |
| <i>Conuropsis carolinensis</i>         | avians    | photopic | ADW |
| <i>Coracias cyanogaster</i>            | avians    | photopic | ADW |
| <i>Coracias naevius</i>                | avians    | photopic | S3  |
| <i>Corallus caninus</i>                | squamates | scotopic | ADW |
| <i>Corallus hortulanus</i>             | squamates | mesopic  | ADW |
| <i>Cordylus cataphractus</i>           | squamates | photopic | ADW |
| <i>Cordylus giganteus</i>              | squamates | photopic | S2  |
| <i>Corucia zebrata</i>                 | squamates | scotopic | S2  |
| <i>Corvus brachyrhynchos</i>           | avians    | photopic | S2  |
| <i>Corvus caurinus</i>                 | avians    | photopic | ADW |
| <i>Corvus corax</i>                    | avians    | photopic | S2  |
| <i>Corynorhinus rafinesquii</i>        | mammals   | scotopic | ADW |
| <i>Corynorhinus townsendii</i>         | mammals   | scotopic | ADW |

|                                     |           |          |     |
|-------------------------------------|-----------|----------|-----|
| <i>Corythaeola cristata</i>         | avians    | photopic | S3  |
| <i>Crateromys schadenbergi</i>      | mammals   | scotopic | ADW |
| <i>Cratogeomys neglectus</i>        | mammals   | scotopic | ADW |
| <i>Cricetomys gambianus</i>         | mammals   | scotopic | ADW |
| <i>Crocota crocata</i>              | mammals   | photopic | ADW |
| <i>Crossoptilon mantchuricum</i>    | avians    | photopic | ADW |
| <i>Crotalus molossus</i>            | squamates | mesopic  | ADW |
| <i>Crotalus unicolor</i>            | squamates | scotopic | ADW |
| <i>Crotalus viridis</i>             | squamates | scotopic | ADW |
| <i>Crotaphytes bicinctores</i>      | squamates | photopic | S2  |
| <i>Cryptoprocta ferox</i>           | mammals   | scotopic | ADW |
| <i>Cryptotis parva</i>              | mammals   | mesopic  | ADW |
| <i>Crypturellus boucardi</i>        | avians    | photopic | ADW |
| <i>Ctenomys conoveri</i>            | mammals   | photopic | ADW |
| <i>Ctenomys talarum</i>             | mammals   | photopic | ADW |
| <i>Ctenosaura clarki</i>            | squamates | photopic | S2  |
| <i>Ctenosaura hemilopha</i>         | squamates | photopic | S2  |
| <i>Ctenosaura pectinata</i>         | squamates | photopic | S2  |
| <i>Cuculus canorus</i>              | avians    | photopic | ADW |
| <i>Cuniculus taczanowskii</i>       | mammals   | scotopic | ADW |
| <i>Cyanocitta cristata</i>          | avians    | photopic | ADW |
| <i>Cyanopsitta spixii</i>           | avians    | photopic | ADW |
| <i>Cygnus atratus</i>               | avians    | scotopic | ADW |
| <i>Cygnus columbianus</i>           | avians    | mesopic  | S2  |
| <i>Cygnus melancoryphus</i>         | avians    | photopic | ADW |
| <i>Cygnus olor</i>                  | avians    | photopic | ADW |
| <i>Cynomys leucurus</i>             | mammals   | photopic | ADW |
| <i>Cynomys ludovicianus</i>         | mammals   | photopic | ADW |
| <i>Cynopterus brachyotis</i>        | mammals   | scotopic | ADW |
| <i>Cystophora cristata</i>          | mammals   | photopic | ADW |
| <i>Dactylopsila trivirgata</i>      | mammals   | scotopic | ADW |
| <i>Dama dama</i>                    | mammals   | mesopic  | ADW |
| <i>Damaliscus korrigum</i>          | mammals   | mesopic  | S3  |
| <i>Dasyercus cristicauda</i>        | mammals   | mesopic  | ADW |
| <i>Dasyprocta leporina</i>          | mammals   | photopic | ADW |
| <i>Dasyprocta punctata</i>          | mammals   | photopic | ADW |
| <i>Dasyprocta ruatanica</i>         | mammals   | photopic | ADW |
| <i>Dasypus hybridus</i>             | mammals   | scotopic | ADW |
| <i>Dasypus novemcinctus</i>         | mammals   | mesopic  | ADW |
| <i>Dasyurus maculatus</i>           | mammals   | scotopic | ADW |
| <i>Daubentonia madagascariensis</i> | mammals   | scotopic | ADW |
| <i>Dendragapus obscurus</i>         | avians    | mesopic  | S2  |
| <i>Dendroaspis polylepis</i>        | squamates | photopic | ADW |

|                                 |           |          |     |
|---------------------------------|-----------|----------|-----|
| <i>Dendrocopos leucotos</i>     | avians    | photopic | ADW |
| <i>Dendrohyrax arboreus</i>     | mammals   | scotopic | ADW |
| <i>Dendroica caerulescens</i>   | avians    | photopic | ADW |
| <i>Dendroica petechia</i>       | avians    | photopic | ADW |
| <i>Dendroica virens</i>         | avians    | photopic | ADW |
| <i>Dendrolagus matschiei</i>    | mammals   | photopic | ADW |
| <i>Dendrolagus scottae</i>      | mammals   | photopic | ADW |
| <i>Dendromus mystacalis</i>     | mammals   | scotopic | ADW |
| <i>Dendrotyx barbatus</i>       | avians    | photopic | ADW |
| <i>Desmodus rotundus</i>        | mammals   | scotopic | ADW |
| <i>Diadophis punctatus</i>      | squamates | scotopic | ADW |
| <i>Diaemus youngi</i>           | mammals   | scotopic | ADW |
| <i>Diceros bicornis</i>         | mammals   | photopic | ADW |
| <i>Diclidurus albus</i>         | mammals   | scotopic | ADW |
| <i>Dicrurus paradiseus</i>      | avians    | photopic | ADW |
| <i>Didelphis albiventris</i>    | mammals   | scotopic | ADW |
| <i>Didelphis aurita</i>         | mammals   | scotopic | ADW |
| <i>Didelphis marsupialis</i>    | mammals   | scotopic | S3  |
| <i>Didelphis virginiana</i>     | mammals   | scotopic | ADW |
| <i>Diomedea epomophora</i>      | avians    | mesopic  | ADW |
| <i>Diomedea exulans</i>         | avians    | photopic | ADW |
| <i>Diphyllodes magnificus</i>   | avians    | photopic | ADW |
| <i>Dipodomys californicus</i>   | mammals   | scotopic | ADW |
| <i>Dipodomys compactus</i>      | mammals   | scotopic | ADW |
| <i>Dipodomys deserti</i>        | mammals   | scotopic | ADW |
| <i>Dipodomys elator</i>         | mammals   | scotopic | ADW |
| <i>Dipodomys microps</i>        | mammals   | scotopic | ADW |
| <i>Dipodomys ordii</i>          | mammals   | scotopic | ADW |
| <i>Dipodomys venustus</i>       | mammals   | scotopic | ADW |
| <i>Dipsosaurus dorsalis</i>     | squamates | photopic | S2  |
| <i>Distoechurus pennatus</i>    | mammals   | scotopic | ADW |
| <i>Dorcopsis luctuosa</i>       | mammals   | scotopic | ADW |
| <i>Dorcopsulus macleayi</i>     | mammals   | scotopic | ADW |
| <i>Dromaius novaehollandiae</i> | avians    | mesopic  | S2  |
| <i>Dromiciops gliroides</i>     | mammals   | scotopic | ADW |
| <i>Dryocopus pileatus</i>       | avians    | photopic | S2  |
| <i>Dryomys nitedula</i>         | mammals   | scotopic | ADW |
| <i>Dumetella carolinensis</i>   | avians    | photopic | ADW |
| <i>Echimys semivillosus</i>     | mammals   | scotopic | ADW |
| <i>Eidolon helvum</i>           | mammals   | scotopic | ADW |
| <i>Eira barbara</i>             | mammals   | photopic | ADW |
| <i>Elanoides forficatus</i>     | avians    | photopic | ADW |
| <i>Elanus leucurus</i>          | avians    | photopic | S2  |

|                               |           |          |     |
|-------------------------------|-----------|----------|-----|
| <i>Elaphe gloydi</i>          | squamates | photopic | ADW |
| <i>Elaphe vulpina</i>         | squamates | photopic | ADW |
| <i>Elaphodus cephalophus</i>  | mammals   | mesopic  | ADW |
| <i>Elephantulus myurus</i>    | mammals   | scotopic | ADW |
| <i>Elephantulus rozeti</i>    | mammals   | photopic | ADW |
| <i>Elephantulus rufescens</i> | mammals   | scotopic | ADW |
| <i>Elephas maximus</i>        | mammals   | photopic | ADW |
| <i>Eliomys quercinus</i>      | mammals   | scotopic | ADW |
| <i>Empidonax difficilis</i>   | avians    | photopic | ADW |
| <i>Eonycteris major</i>       | mammals   | scotopic | ADW |
| <i>Eonycteris spelaea</i>     | mammals   | scotopic | ADW |
| <i>Epomophorus gambianus</i>  | mammals   | scotopic | ADW |
| <i>Eptesicus fuscus</i>       | mammals   | scotopic | ADW |
| <i>Equus asinus</i>           | mammals   | photopic | ADW |
| <i>Equus burchellii</i>       | mammals   | photopic | ADW |
| <i>Equus caballus</i>         | mammals   | mesopic  | S3  |
| <i>Equus grevyi</i>           | mammals   | photopic | ADW |
| <i>Equus hemionus onager</i>  | mammals   | mesopic  | ADW |
| <i>Equus kiang</i>            | mammals   | scotopic | ADW |
| <i>Equus zebra</i>            | mammals   | photopic | ADW |
| <i>Eremitalpa granti</i>      | mammals   | scotopic | ADW |
| <i>Erethizon dorsatum</i>     | mammals   | scotopic | ADW |
| <i>Erinaceus europaeus</i>    | mammals   | scotopic | ADW |
| <i>Erophylla sezekorni</i>    | mammals   | scotopic | ADW |
| <i>Erythrocebus patas</i>     | mammals   | photopic | ADW |
| <i>Eublepharis macularius</i> | squamates | scotopic | S3  |
| <i>Eublepharis maculatus</i>  | squamates | scotopic | S2  |
| <i>Eublepharis sp</i>         | squamates | scotopic | S2  |
| <i>Euchoreutes naso</i>       | mammals   | scotopic | ADW |
| <i>Eudocimus ruber</i>        | avians    | photopic | ADW |
| <i>Eudorcas thomsonii</i>     | mammals   | photopic | ADW |
| <i>Eudyptes chrysocome</i>    | avians    | photopic | ADW |
| <i>Eudyptes chrysolophus</i>  | avians    | photopic | ADW |
| <i>Eudyptes robustus</i>      | avians    | photopic | ADW |
| <i>Eulemur coronatus</i>      | mammals   | photopic | ADW |
| <i>Eulemur fulvus</i>         | mammals   | photopic | ADW |
| <i>Eulemur macaco</i>         | mammals   | photopic | ADW |
| <i>Eulemur mongoz</i>         | mammals   | mesopic  | ADW |
| <i>Eulemur rubriventer</i>    | mammals   | photopic | ADW |
| <i>Eumeces fasciatus</i>      | squamates | photopic | ADW |
| <i>Eumops glaucinus</i>       | mammals   | scotopic | ADW |
| <i>Eumops perotis</i>         | mammals   | scotopic | ADW |
| <i>Eunectes notaeus</i>       | squamates | mesopic  | ADW |

|                               |           |          |     |
|-------------------------------|-----------|----------|-----|
| <i>Euoticus elegantulus</i>   | mammals   | scotopic | ADW |
| <i>Falco biarmicus</i>        | avians    | photopic | ADW |
| <i>Falco cherrug</i>          | avians    | photopic | ADW |
| <i>Falco eleonorae</i>        | avians    | photopic | ADW |
| <i>Falco mexicanus</i>        | avians    | mesopic  | S2  |
| <i>Falco peregrinus</i>       | avians    | photopic | ADW |
| <i>Falco rusticolus</i>       | avians    | photopic | S2  |
| <i>Falco sparverius</i>       | avians    | photopic | S2  |
| <i>Falco tinnunculus</i>      | avians    | photopic | S2  |
| <i>Felis bieti</i>            | mammals   | scotopic | ADW |
| <i>Felis catus</i>            | mammals   | mesopic  | S3  |
| <i>Felis chaus</i>            | mammals   | mesopic  | ADW |
| <i>Felis manul</i>            | mammals   | scotopic | ADW |
| <i>Felis margarita</i>        | mammals   | scotopic | ADW |
| <i>Felis nigripes</i>         | mammals   | scotopic | ADW |
| <i>Felis serval</i>           | mammals   | mesopic  | S3  |
| <i>Felis silvestris</i>       | mammals   | scotopic | ADW |
| <i>Feresa attenuata</i>       | mammals   | photopic | ADW |
| <i>Ficedula hypoleuca</i>     | avians    | photopic | ADW |
| <i>Fossa fossana</i>          | mammals   | scotopic | ADW |
| <i>Fregata andrewsi</i>       | avians    | photopic | ADW |
| <i>Fregata magnificens</i>    | avians    | photopic | ADW |
| <i>Fregata minor</i>          | avians    | photopic | ADW |
| <i>Fulica americana</i>       | avians    | photopic | ADW |
| <i>Fulmarus glacialis</i>     | avians    | mesopic  | ADW |
| <i>Funambulus pennantii</i>   | mammals   | photopic | ADW |
| <i>Furcifer cephalolepis</i>  | squamates | photopic | S2  |
| <i>Furipterus horrens</i>     | mammals   | scotopic | ADW |
| <i>Galago alleni</i>          | mammals   | scotopic | ADW |
| <i>Galago demidoff</i>        | mammals   | scotopic | ADW |
| <i>Galago gabonensis</i>      | mammals   | scotopic | ADW |
| <i>Galago moholi</i>          | mammals   | scotopic | ADW |
| <i>Galago senegalensis</i>    | mammals   | scotopic | ADW |
| <i>Galago thomasi</i>         | mammals   | scotopic | ADW |
| <i>Galago zanzibaricus</i>    | mammals   | scotopic | ADW |
| <i>Galictis cuja</i>          | mammals   | mesopic  | ADW |
| <i>Galidia elegans</i>        | mammals   | photopic | ADW |
| <i>Galidictis fasciata</i>    | mammals   | scotopic | ADW |
| <i>Galidictis grandidieri</i> | mammals   | scotopic | ADW |
| <i>Gallinago gallinago</i>    | avians    | mesopic  | S2  |
| <i>Gallinula chloropus</i>    | avians    | photopic | S2  |
| <i>Gallus gallus</i>          | avians    | photopic | S3  |
| <i>Gambelia wislizenii</i>    | squamates | photopic | S2  |

|                                   |           |          |     |
|-----------------------------------|-----------|----------|-----|
| <i>Garrulus glandarius</i>        | avians    | photopic | S2  |
| <i>Gavia immer</i>                | avians    | photopic | ADW |
| <i>Gazella dorcas</i>             | mammals   | mesopic  | ADW |
| <i>Gazella rufifrons</i>          | mammals   | mesopic  | S3  |
| <i>Gazella soemmeringii</i>       | mammals   | mesopic  | S3  |
| <i>Gekko gecko</i>                | squamates | scotopic | S2  |
| <i>Gekko ulikovskii</i>           | squamates | scotopic | S2  |
| <i>Genetta angolensis</i>         | mammals   | scotopic | ADW |
| <i>Geococcyx californianus</i>    | avians    | photopic | ADW |
| <i>Geogale aurita</i>             | mammals   | scotopic | ADW |
| <i>Gerbillus cheesmani</i>        | mammals   | scotopic | ADW |
| <i>Gerrhosaurus major</i>         | squamates | photopic | S2  |
| <i>Giraffa camelopardalis</i>     | mammals   | mesopic  | S3  |
| <i>Glaucidium brasilianum</i>     | avians    | photopic | ADW |
| <i>Glaucidium gnoma</i>           | avians    | photopic | S2  |
| <i>Glaucomys sabrinus</i>         | mammals   | scotopic | ADW |
| <i>Glaucomys volans</i>           | mammals   | scotopic | ADW |
| <i>Glironia venusta</i>           | mammals   | scotopic | ADW |
| <i>Glirulus japonicus</i>         | mammals   | scotopic | ADW |
| <i>Globicephala melas</i>         | mammals   | mesopic  | ADW |
| <i>Glossophaga commissarisi</i>   | mammals   | scotopic | ADW |
| <i>Gorilla beringei</i>           | mammals   | photopic | ADW |
| <i>Gorilla gorilla</i>            | mammals   | photopic | S3  |
| <i>Grus canadensis</i>            | avians    | photopic | ADW |
| <i>Grus leucogeranus</i>          | avians    | photopic | ADW |
| <i>Gulo gulo</i>                  | mammals   | mesopic  | ADW |
| <i>Gymnobileidus leadbeateri</i>  | mammals   | scotopic | ADW |
| <i>Gymnogyps californianus</i>    | avians    | photopic | S3  |
| <i>Gyps bengalensis</i>           | avians    | photopic | ADW |
| <i>Gyps rueppellii</i>            | avians    | photopic | S3  |
| <i>Halcyon smyrnensis</i>         | avians    | photopic | ADW |
| <i>Hapalemur aureus</i>           | mammals   | mesopic  | ADW |
| <i>Hapalemur griseus</i>          | mammals   | mesopic  | ADW |
| <i>Harpyionycteris whiteheadi</i> | mammals   | scotopic | ADW |
| <i>Helarctos malayanus</i>        | mammals   | scotopic | ADW |
| <i>Heliosciurus gambianus</i>     | mammals   | photopic | ADW |
| <i>Hemibelideus lemuroides</i>    | mammals   | scotopic | ADW |
| <i>Hemicentetes semispinosus</i>  | mammals   | photopic | ADW |
| <i>Hemigalus derbyanus</i>        | mammals   | scotopic | ADW |
| <i>Hemitragus hylacrius</i>       | mammals   | photopic | ADW |
| <i>Hemitragus jayakari</i>        | mammals   | photopic | ADW |
| <i>Hemitragus jemlahicus</i>      | mammals   | mesopic  | ADW |
| <i>Herpestes edwardsi</i>         | mammals   | photopic | ADW |



|                                  |           |          |     |
|----------------------------------|-----------|----------|-----|
| <i>Herpestes ichneumon</i>       | mammals   | mesopic  | ADW |
| <i>Herpestes javanicus</i>       | mammals   | photopic | ADW |
| <i>Heterodon nasicus</i>         | squamates | mesopic  | ADW |
| <i>Heterodon platirhinos</i>     | squamates | photopic | ADW |
| <i>Heteronetta atricapilla</i>   | avians    | photopic | ADW |
| <i>Hexaprotodon liberiensis</i>  | mammals   | scotopic | ADW |
| <i>Hipposideros commersoni</i>   | mammals   | scotopic | ADW |
| <i>Hipposideros diadema</i>      | mammals   | scotopic | ADW |
| <i>Hipposideros fulvus</i>       | mammals   | scotopic | ADW |
| <i>Hippotragus equinus</i>       | mammals   | mesopic  | ADW |
| <i>Hippotragus niger</i>         | mammals   | scotopic | ADW |
| <i>Hirundo rustica</i>           | avians    | photopic | ADW |
| <i>Holbrookia propinqua</i>      | squamates | photopic | ADW |
| <i>Homo sapiens</i>              | mammals   | photopic | S3  |
| <i>Hoplomys gymmurus</i>         | mammals   | scotopic | ADW |
| <i>Hydrochoerus hydrochaeris</i> | mammals   | mesopic  | ADW |
| <i>Hylobates agilis</i>          | mammals   | photopic | ADW |
| <i>Hylobates klossii</i>         | mammals   | photopic | ADW |
| <i>Hylobates lar</i>             | mammals   | photopic | ADW |
| <i>Hylobates moloch</i>          | mammals   | photopic | ADW |
| <i>Hylobates muelleri</i>        | mammals   | photopic | ADW |
| <i>Hylobates pileatus</i>        | mammals   | photopic | ADW |
| <i>Hylocichla mustelina</i>      | avians    | photopic | ADW |
| <i>Hylonycteris underwoodi</i>   | mammals   | scotopic | ADW |
| <i>Hypogeomys antimena</i>       | mammals   | scotopic | ADW |
| <i>Hypsognathus monstrosus</i>   | mammals   | scotopic | ADW |
| <i>Hystrix africaeaustralis</i>  | mammals   | scotopic | ADW |
| <i>Hystrix pumila</i>            | mammals   | scotopic | ADW |
| <i>Ichneumia albicauda</i>       | mammals   | scotopic | ADW |
| <i>Icterus abeillei</i>          | avians    | photopic | ADW |
| <i>Icterus cayanensis</i>        | avians    | photopic | ADW |
| <i>Icterus chrysater</i>         | avians    | photopic | ADW |
| <i>Icterus galbula</i>           | avians    | photopic | ADW |
| <i>Icterus graduacauda</i>       | avians    | photopic | ADW |
| <i>Icterus gularis</i>           | avians    | photopic | ADW |
| <i>Icterus icterus</i>           | avians    | photopic | ADW |
| <i>Icterus oberi</i>             | avians    | photopic | ADW |
| <i>Icterus pustulatus</i>        | avians    | photopic | ADW |
| <i>Icterus spurius</i>           | avians    | mesopic  | ADW |
| <i>Ictinia mississippiensis</i>  | avians    | photopic | ADW |
| <i>Ictonyx striatus</i>          | mammals   | scotopic | ADW |
| <i>Idiurus macrotis</i>          | mammals   | scotopic | ADW |
| <i>Idiurus zenkeri</i>           | mammals   | scotopic | ADW |

|                                   |           |          |     |
|-----------------------------------|-----------|----------|-----|
| <i>Iguana iguana</i>              | squamates | photopic | S3  |
| <i>Indri indri</i>                | mammals   | photopic | ADW |
| <i>Irediparra gallinacea</i>      | avians    | photopic | S3  |
| <i>Ixoreus naevius</i>            | avians    | photopic | S2  |
| <i>Jabiru mycteria</i>            | avians    | photopic | ADW |
| <i>Jacana spinosa</i>             | avians    | photopic | ADW |
| <i>Jaculus jaculus</i>            | mammals   | scotopic | ADW |
| <i>Jaculus orientalis</i>         | mammals   | scotopic | ADW |
| <i>Junco hyemalis</i>             | avians    | photopic | ADW |
| <i>Kerivoula lanosa</i>           | mammals   | scotopic | ADW |
| <i>Kerodon rupestris</i>          | mammals   | mesopic  | ADW |
| <i>Kobus ellipsiprymnus</i>       | mammals   | mesopic  | S3  |
| <i>Kobus megaceros</i>            | mammals   | photopic | ADW |
| <i>Kobus vardonii</i>             | mammals   | scotopic | ADW |
| <i>Lacerta sp</i>                 | squamates | photopic | S2  |
| <i>Lagenorhynchus obscurus</i>    | mammals   | photopic | ADW |
| <i>Lagopus lagopus</i>            | avians    | mesopic  | S2  |
| <i>Lagorchestes hirsutus</i>      | mammals   | scotopic | ADW |
| <i>Lagostrophus fasciatus</i>     | mammals   | scotopic | ADW |
| <i>Lagothrix lagotricha</i>       | mammals   | photopic | ADW |
| <i>Lagurus lagurus</i>            | mammals   | mesopic  | ADW |
| <i>Lama glama</i>                 | mammals   | photopic | ADW |
| <i>Lama pacos</i>                 | mammals   | photopic | ADW |
| <i>Lampropeltis getula</i>        | squamates | mesopic  | ADW |
| <i>Lampropeltis triangulum</i>    | squamates | mesopic  | ADW |
| <i>Lanius ludovicianus</i>        | avians    | photopic | S2  |
| <i>Larus argentatus</i>           | avians    | mesopic  | S2  |
| <i>Larus californicus</i>         | avians    | mesopic  | S2  |
| <i>Larus canus</i>                | avians    | mesopic  | S2  |
| <i>Larus delawarensis</i>         | avians    | photopic | ADW |
| <i>Larus occidentalis</i>         | avians    | photopic | S2  |
| <i>Larus philadelphia</i>         | avians    | photopic | ADW |
| <i>Lasionycteris noctivagans</i>  | mammals   | scotopic | ADW |
| <i>Lasiorhinus latifrons</i>      | mammals   | mesopic  | ADW |
| <i>Lasiurus borealis</i>          | mammals   | scotopic | ADW |
| <i>Lasiurus cinereus</i>          | mammals   | scotopic | ADW |
| <i>Lasiurus seminolus</i>         | mammals   | mesopic  | ADW |
| <i>Laterallus jamaicensis</i>     | avians    | photopic | S2  |
| <i>Lavia frons</i>                | mammals   | scotopic | ADW |
| <i>Lemmiscus curtatus</i>         | mammals   | mesopic  | ADW |
| <i>Lemur catta</i>                | mammals   | photopic | ADW |
| <i>Leontopithecus caissara</i>    | mammals   | photopic | ADW |
| <i>Leontopithecus chrysomelas</i> | mammals   | photopic | ADW |

|                                  |           |          |     |
|----------------------------------|-----------|----------|-----|
| <i>Leontopithecus rosalia</i>    | mammals   | photopic | ADW |
| <i>Leopardus colocolo</i>        | mammals   | scotopic | ADW |
| <i>Leopardus geoffroyi</i>       | mammals   | scotopic | ADW |
| <i>Leopardus guigna</i>          | mammals   | mesopic  | ADW |
| <i>Leopardus jacobitus</i>       | mammals   | scotopic | ADW |
| <i>Leopardus pardalis</i>        | mammals   | scotopic | ADW |
| <i>Leopardus tigrinus</i>        | mammals   | scotopic | ADW |
| <i>Leopardus wiedii</i>          | mammals   | photopic | ADW |
| <i>Lepilemur leucopus</i>        | mammals   | scotopic | ADW |
| <i>Lepilemur mustelinus</i>      | mammals   | scotopic | ADW |
| <i>Lepilemur septentrionalis</i> | mammals   | scotopic | ADW |
| <i>Leptailurus serval</i>        | mammals   | mesopic  | ADW |
| <i>Leptonycteris nivalis</i>     | mammals   | scotopic | ADW |
| <i>Leptonycteris yerbabuena</i>  | mammals   | scotopic | ADW |
| <i>Lepus alleni</i>              | mammals   | scotopic | ADW |
| <i>Lepus americanus</i>          | mammals   | scotopic | ADW |
| <i>Lepus callotis</i>            | mammals   | scotopic | ADW |
| <i>Lepus capensis</i>            | mammals   | photopic | ADW |
| <i>Lepus castroviejoi</i>        | mammals   | scotopic | ADW |
| <i>Lepus europaeus</i>           | mammals   | scotopic | ADW |
| <i>Lepus insularis</i>           | mammals   | scotopic | ADW |
| <i>Lepus nigricollis</i>         | mammals   | mesopic  | ADW |
| <i>Lepus othus</i>               | mammals   | mesopic  | ADW |
| <i>Lepus saxatilis</i>           | mammals   | scotopic | ADW |
| <i>Lepus timidus</i>             | mammals   | scotopic | ADW |
| <i>Lepus townsendii</i>          | mammals   | scotopic | ADW |
| <i>Lestodelphys halli</i>        | mammals   | scotopic | ADW |
| <i>Lialis burtoni</i>            | squamates | scotopic | S2  |
| <i>Limnogale mergulus</i>        | mammals   | scotopic | ADW |
| <i>Liochlorophis vernalis</i>    | squamates | photopic | ADW |
| <i>Liolaemus belli</i>           | squamates | photopic | S2  |
| <i>Liolaemus bibronni</i>        | squamates | photopic | S2  |
| <i>Liolaemus buergeri</i>        | squamates | photopic | S2  |
| <i>Lipotes vexillifer</i>        | mammals   | photopic | ADW |
| <i>Litocranius walleri</i>       | mammals   | photopic | ADW |
| <i>Lobodon carcinophaga</i>      | mammals   | scotopic | ADW |
| <i>Lonchophylla thomasi</i>      | mammals   | scotopic | ADW |
| <i>Lontra felina</i>             | mammals   | photopic | ADW |
| <i>Lontra provocax</i>           | mammals   | scotopic | ADW |
| <i>Lophocebus albigena</i>       | mammals   | photopic | ADW |
| <i>Lophodytes cucullatus</i>     | avians    | photopic | ADW |
| <i>Lophophorus impeyanus</i>     | avians    | photopic | S2  |
| <i>Lophura bulweri</i>           | avians    | mesopic  | S2  |

|                                  |           |          |     |
|----------------------------------|-----------|----------|-----|
| <i>Loris tardigradus</i>         | mammals   | scotopic | ADW |
| <i>Loxia curvirostra</i>         | avians    | photopic | ADW |
| <i>Loxodonta africana</i>        | mammals   | mesopic  | ADW |
| <i>Loxodonta cyclotis</i>        | mammals   | mesopic  | ADW |
| <i>Luscinia megarhynchos</i>     | avians    | mesopic  | ADW |
| <i>Lutreolina crassicaudata</i>  | mammals   | scotopic | ADW |
| <i>Lycalopex culpaeus</i>        | mammals   | mesopic  | ADW |
| <i>Lycalopex fulvipes</i>        | mammals   | mesopic  | ADW |
| <i>Lycalopex griseus</i>         | mammals   | scotopic | ADW |
| <i>Lycalopex gymnocercus</i>     | mammals   | scotopic | ADW |
| <i>Lycalopex vetulus</i>         | mammals   | mesopic  | ADW |
| <i>Lycan pictus</i>              | mammals   | photopic | ADW |
| <i>Lyncodon patagonicus</i>      | mammals   | scotopic | ADW |
| <i>Lynx canadensis</i>           | mammals   | scotopic | ADW |
| <i>Lynx lynx</i>                 | mammals   | mesopic  | ADW |
| <i>Lynx pardinus</i>             | mammals   | scotopic | ADW |
| <i>Lynx rufus</i>                | mammals   | scotopic | ADW |
| <i>Mabuya mabuya</i>             | squamates | photopic | S2  |
| <i>Macaca arctoides</i>          | mammals   | photopic | ADW |
| <i>Macaca cyclopis</i>           | mammals   | photopic | ADW |
| <i>Macaca fascicularis</i>       | mammals   | photopic | ADW |
| <i>Macaca fuscata</i>            | mammals   | photopic | ADW |
| <i>Macaca mulatta</i>            | mammals   | photopic | ADW |
| <i>Macaca nemestrina</i>         | mammals   | photopic | ADW |
| <i>Macaca radiata</i>            | mammals   | photopic | ADW |
| <i>Macaca silenus</i>            | mammals   | photopic | ADW |
| <i>Macaca sinica</i>             | mammals   | photopic | ADW |
| <i>Macaca sylvanus</i>           | mammals   | photopic | ADW |
| <i>Macroderma gigas</i>          | mammals   | scotopic | ADW |
| <i>Macroglossus sobrinus</i>     | mammals   | scotopic | ADW |
| <i>Macrophyllum macrophyllum</i> | mammals   | scotopic | ADW |
| <i>Macropus agilis</i>           | mammals   | scotopic | ADW |
| <i>Macropus dorsalis</i>         | mammals   | scotopic | ADW |
| <i>Macropus eugenii</i>          | mammals   | scotopic | ADW |
| <i>Macropus giganteus</i>        | mammals   | scotopic | ADW |
| <i>Macropus parma</i>            | mammals   | scotopic | ADW |
| <i>Macropus rufus</i>            | mammals   | scotopic | ADW |
| <i>Macrotis lagotis</i>          | mammals   | scotopic | ADW |
| <i>Macrotus californicus</i>     | mammals   | scotopic | ADW |
| <i>Mandrillus leucophaeus</i>    | mammals   | photopic | ADW |
| <i>Mandrillus sphinx</i>         | mammals   | photopic | ADW |
| <i>Manis javanica</i>            | mammals   | scotopic | ADW |
| <i>Manis temminckii</i>          | mammals   | scotopic | ADW |

|                                    |         |          |     |
|------------------------------------|---------|----------|-----|
| <i>Marmaronetta angustirostris</i> | avians  | photopic | S3  |
| <i>Marmota bobak</i>               | mammals | mesopic  | ADW |
| <i>Marmota caligata</i>            | mammals | photopic | ADW |
| <i>Marmota monax</i>               | mammals | photopic | ADW |
| <i>Marmota olympus</i>             | mammals | photopic | ADW |
| <i>Marmota vancouverensis</i>      | mammals | photopic | ADW |
| <i>Martes americana</i>            | mammals | scotopic | ADW |
| <i>Martes foina</i>                | mammals | scotopic | ADW |
| <i>Martes melampus</i>             | mammals | scotopic | ADW |
| <i>Martes pennanti</i>             | mammals | mesopic  | ADW |
| <i>Mazama gouazoubira</i>          | mammals | scotopic | ADW |
| <i>Megaceryle alcyon</i>           | avians  | photopic | ADW |
| <i>Megaderma lyra</i>              | mammals | scotopic | ADW |
| <i>Megadyptes antipodes</i>        | avians  | photopic | ADW |
| <i>Megaptera novaeangliae</i>      | mammals | photopic | ADW |
| <i>Melanerpes carolinus</i>        | avians  | photopic | ADW |
| <i>Melanerpes erythrocephalus</i>  | avians  | photopic | ADW |
| <i>Meleagris gallopavo</i>         | avians  | photopic | S2  |
| <i>Meleagris ocellata</i>          | avians  | photopic | S2  |
| <i>Mellisuga helenae</i>           | avians  | photopic | ADW |
| <i>Melogale everetti</i>           | mammals | scotopic | ADW |
| <i>Melogale moschata</i>           | mammals | scotopic | ADW |
| <i>Melogale personata</i>          | mammals | scotopic | ADW |
| <i>Melopsittacus undulatus</i>     | avians  | photopic | ADW |
| <i>Melospiza melodia</i>           | avians  | photopic | S2  |
| <i>Melursus ursinus</i>            | mammals | scotopic | ADW |
| <i>Mephitis mephitis</i>           | mammals | scotopic | ADW |
| <i>Merganetta armata</i>           | avians  | photopic | ADW |
| <i>Mergus merganser</i>            | avians  | photopic | ADW |
| <i>Mergus serrator</i>             | avians  | photopic | ADW |
| <i>Meriones crassus</i>            | mammals | scotopic | ADW |
| <i>Mesocricetus auratus</i>        | mammals | scotopic | ADW |
| <i>Mesoplodon bidens</i>           | mammals | photopic | ADW |
| <i>Mesoplodon carlhubbsi</i>       | mammals | photopic | ADW |
| <i>Mesoplodon grayi</i>            | mammals | photopic | ADW |
| <i>Mesoplodon layardii</i>         | mammals | photopic | ADW |
| <i>Mesoplodon stejnegeri</i>       | mammals | photopic | ADW |
| <i>Metachirus nudicaudatus</i>     | mammals | scotopic | ADW |
| <i>Micrathene whitneyi</i>         | avians  | scotopic | ADW |
| <i>Microcavia australis</i>        | mammals | photopic | ADW |
| <i>Microcebus murinus</i>          | mammals | scotopic | ADW |
| <i>Microcebus rufus</i>            | mammals | scotopic | ADW |
| <i>Microdipodops pallidus</i>      | mammals | scotopic | ADW |

|                                   |           |          |     |
|-----------------------------------|-----------|----------|-----|
| <i>Microgale brevicaudata</i>     | mammals   | mesopic  | ADW |
| <i>Microgale dryas</i>            | mammals   | mesopic  | ADW |
| <i>Microgale longicaudata</i>     | mammals   | scotopic | ADW |
| <i>Microgale talazaci</i>         | mammals   | mesopic  | ADW |
| <i>Microhierax caerulescens</i>   | avians    | photopic | S2  |
| <i>Microlophus albemarlensis</i>  | squamates | photopic | ADW |
| <i>Microlophus peruvianus</i>     | squamates | photopic | S2  |
| <i>Micropotamogale lamottei</i>   | mammals   | scotopic | ADW |
| <i>Micropotamogale ruwenzorii</i> | mammals   | scotopic | ADW |
| <i>Micropteropus pusillus</i>     | mammals   | scotopic | ADW |
| <i>Microtus californicus</i>      | mammals   | mesopic  | ADW |
| <i>Microtus longicaudus</i>       | mammals   | scotopic | ADW |
| <i>Microtus ochrogaster</i>       | mammals   | mesopic  | ADW |
| <i>Microtus oeconomicus</i>       | mammals   | mesopic  | ADW |
| <i>Microtus pennsylvanicus</i>    | mammals   | mesopic  | ADW |
| <i>Microtus pinetorum</i>         | mammals   | mesopic  | ADW |
| <i>Milvus milvus</i>              | avians    | photopic | S2  |
| <i>Mimon crenulatum</i>           | mammals   | scotopic | ADW |
| <i>Mimus polyglottos</i>          | avians    | photopic | ADW |
| <i>Miniopterus australis</i>      | mammals   | scotopic | ADW |
| <i>Miniopterus schreibersii</i>   | mammals   | scotopic | ADW |
| <i>Miopithecus talapoin</i>       | mammals   | photopic | ADW |
| <i>Mirounga angustirostris</i>    | mammals   | mesopic  | ADW |
| <i>Mirounga leonina</i>           | mammals   | mesopic  | ADW |
| <i>Mniotilta varia</i>            | avians    | photopic | ADW |
| <i>Moloch horridus</i>            | squamates | photopic | ADW |
| <i>Monachus monachus</i>          | mammals   | photopic | ADW |
| <i>Monachus tropicalis</i>        | mammals   | mesopic  | ADW |
| <i>Monodelphis brevicaudata</i>   | mammals   | photopic | ADW |
| <i>Monodelphis domestica</i>      | mammals   | mesopic  | ADW |
| <i>Morus bassanus</i>             | avians    | photopic | ADW |
| <i>Morus capensis</i>             | avians    | photopic | ADW |
| <i>Moschus chrysogaster</i>       | mammals   | scotopic | ADW |
| <i>Moschus fuscus</i>             | mammals   | scotopic | ADW |
| <i>Moschus moschiferus</i>        | mammals   | mesopic  | S3  |
| <i>Mungotictis decemlineata</i>   | mammals   | photopic | ADW |
| <i>Muntiacus atherodes</i>        | mammals   | photopic | ADW |
| <i>Muntiacus feae</i>             | mammals   | scotopic | ADW |
| <i>Muntiacus gongshanensis</i>    | mammals   | mesopic  | ADW |
| <i>Muntiacus reevesi</i>          | mammals   | mesopic  | ADW |
| <i>Muntiacus vuquangensis</i>     | mammals   | mesopic  | ADW |
| <i>Murina cyclotis</i>            | mammals   | scotopic | ADW |
| <i>Murina suilla</i>              | mammals   | scotopic | ADW |

|                                 |         |          |     |
|---------------------------------|---------|----------|-----|
| <i>Mus musculus</i>             | mammals | scotopic | S3  |
| <i>Muscardinus avellanarius</i> | mammals | scotopic | ADW |
| <i>Musonycteris harrisoni</i>   | mammals | scotopic | ADW |
| <i>Mustela altaica</i>          | mammals | scotopic | ADW |
| <i>Mustela erminea</i>          | mammals | scotopic | ADW |
| <i>Mustela frenata</i>          | mammals | mesopic  | ADW |
| <i>Mustela kathiah</i>          | mammals | scotopic | ADW |
| <i>Mustela nivalis</i>          | mammals | mesopic  | ADW |
| <i>Mustela putorius</i>         | mammals | scotopic | ADW |
| <i>Mustela putorius furo</i>    | mammals | mesopic  | ADW |
| <i>Mustela sibirica</i>         | mammals | scotopic | ADW |
| <i>Mydaus javanensis</i>        | mammals | scotopic | ADW |
| <i>Myocastor coypus</i>         | mammals | scotopic | ADW |
| <i>Myodes californicus</i>      | mammals | scotopic | ADW |
| <i>Myodes gapperi</i>           | mammals | scotopic | ADW |
| <i>Myodes glareolus</i>         | mammals | scotopic | ADW |
| <i>Myodes rutilus</i>           | mammals | mesopic  | ADW |
| <i>Myoprocta acouchy</i>        | mammals | photopic | ADW |
| <i>Myosciurus pumilio</i>       | mammals | photopic | ADW |
| <i>Myotis auriculus</i>         | mammals | mesopic  | ADW |
| <i>Myotis austroriparius</i>    | mammals | scotopic | ADW |
| <i>Myotis evotis</i>            | mammals | scotopic | ADW |
| <i>Myotis grisescens</i>        | mammals | scotopic | ADW |
| <i>Myotis keenii</i>            | mammals | scotopic | ADW |
| <i>Myotis lucifugus</i>         | mammals | scotopic | ADW |
| <i>Myotis myotis</i>            | mammals | scotopic | ADW |
| <i>Myotis mystacinus</i>        | mammals | scotopic | ADW |
| <i>Myotis septentrionalis</i>   | mammals | scotopic | ADW |
| <i>Myotis sodalis</i>           | mammals | scotopic | ADW |
| <i>Myotis yumanensis</i>        | mammals | scotopic | ADW |
| <i>Myrmecophaga tridactyla</i>  | mammals | photopic | ADW |
| <i>Mysateles prehensilis</i>    | mammals | mesopic  | ADW |
| <i>Mystacina robusta</i>        | mammals | scotopic | ADW |
| <i>Mystromys albicaudatus</i>   | mammals | scotopic | ADW |
| <i>Myzopoda aurita</i>          | mammals | scotopic | ADW |
| <i>Naemorhedus caudatus</i>     | mammals | photopic | ADW |
| <i>Naemorhedus goral</i>        | mammals | photopic | ADW |
| <i>Nanger dama</i>              | mammals | mesopic  | S3  |
| <i>Nanger granti</i>            | mammals | photopic | ADW |
| <i>Nanonycteris veldkmapii</i>  | mammals | scotopic | ADW |
| <i>Napaeozapus insignis</i>     | mammals | scotopic | ADW |
| <i>Nasalis larvatus</i>         | mammals | photopic | ADW |
| <i>Natalus stramineus</i>       | mammals | scotopic | ADW |

|                                 |           |          |     |
|---------------------------------|-----------|----------|-----|
| <i>Necromys lasiurus</i>        | mammals   | mesopic  | ADW |
| <i>Neofelis nebulosa</i>        | mammals   | mesopic  | ADW |
| <i>Neophron percnopterus</i>    | avians    | photopic | ADW |
| <i>Neopsephotus bourkii</i>     | avians    | scotopic | ADW |
| <i>Neotoma floridana</i>        | mammals   | scotopic | ADW |
| <i>Neotoma lepida</i>           | mammals   | scotopic | ADW |
| <i>Neotoma mexicana</i>         | mammals   | scotopic | ADW |
| <i>Neotomodon alstoni</i>       | mammals   | scotopic | ADW |
| <i>Neotragus moschatus</i>      | mammals   | scotopic | ADW |
| <i>Neovison vison</i>           | mammals   | scotopic | ADW |
| <i>Nerodia sipedon</i>          | squamates | photopic | ADW |
| <i>Nesofregatta fuliginosa</i>  | avians    | photopic | ADW |
| <i>Nestor notabilis</i>         | avians    | photopic | ADW |
| <i>Ninox novaeseelandiae</i>    | avians    | scotopic | S2  |
| <i>Nipponia nippon</i>          | avians    | photopic | ADW |
| <i>Noctilio albiventris</i>     | mammals   | scotopic | ADW |
| <i>Noctilio leporinus</i>       | mammals   | scotopic | ADW |
| <i>Nomascus concolor</i>        | mammals   | photopic | ADW |
| <i>Nomascus gabriellae</i>      | mammals   | photopic | ADW |
| <i>Nomascus leucogenys</i>      | mammals   | photopic | ADW |
| <i>Norops sagrei</i>            | squamates | photopic | ADW |
| <i>Notomys alexis</i>           | mammals   | scotopic | ADW |
| <i>Numenius americanus</i>      | avians    | photopic | S2  |
| <i>Nyctalus leisleri</i>        | mammals   | scotopic | ADW |
| <i>Nyctea scandiaca</i>         | avians    | photopic | ADW |
| <i>Nyctereutes procyonoides</i> | mammals   | mesopic  | ADW |
| <i>Nycteris grandis</i>         | mammals   | scotopic | ADW |
| <i>Nycteris hispida</i>         | mammals   | scotopic | ADW |
| <i>Nycteris thebaica</i>        | mammals   | photopic | ADW |
| <i>Nyctibius grandis</i>        | avians    | scotopic | ADW |
| <i>Nyctibius jamaicensis</i>    | avians    | scotopic | S2  |
| <i>Nycticebus cougang</i>       | mammals   | scotopic | S3  |
| <i>Nycticebus pygmaeus</i>      | mammals   | scotopic | ADW |
| <i>Nycticeius humeralis</i>     | mammals   | scotopic | ADW |
| <i>Nyctidromus albicollis</i>   | avians    | scotopic | S2  |
| <i>Nyctiellus lepidus</i>       | mammals   | scotopic | ADW |
| <i>Nyctimene albiventer</i>     | mammals   | scotopic | ADW |
| <i>Nyctinomops macrotis</i>     | mammals   | scotopic | ADW |
| <i>Nymphicus hollandicus</i>    | avians    | photopic | ADW |
| <i>Ochotona cansus</i>          | mammals   | photopic | ADW |
| <i>Ochotona collaris</i>        | mammals   | photopic | ADW |
| <i>Ochotona curzoniae</i>       | mammals   | photopic | ADW |
| <i>Ochotona hyperborea</i>      | mammals   | photopic | ADW |



|                                |           |          |     |
|--------------------------------|-----------|----------|-----|
| <i>Ochotona macrotis</i>       | mammals   | photopic | ADW |
| <i>Ochotona pallasi</i>        | mammals   | photopic | ADW |
| <i>Ochotona pusilla</i>        | mammals   | mesopic  | ADW |
| <i>Ochotona rufescens</i>      | mammals   | mesopic  | ADW |
| <i>Ochotona rutila</i>         | mammals   | mesopic  | ADW |
| <i>Octodon degus</i>           | mammals   | photopic | ADW |
| <i>Odocoileus virginianus</i>  | mammals   | mesopic  | ADW |
| <i>Ondatra zibethicus</i>      | mammals   | scotopic | ADW |
| <i>Onychogalea fraenata</i>    | mammals   | scotopic | ADW |
| <i>Onychomys arenicola</i>     | mammals   | scotopic | ADW |
| <i>Ophisaurus ventralis</i>    | squamates | photopic | S2  |
| <i>Oporornis tolmiei</i>       | avians    | photopic | ADW |
| <i>Oreamnos americanus</i>     | mammals   | photopic | ADW |
| <i>Orthogeomys cavator</i>     | mammals   | mesopic  | ADW |
| <i>Orthogeomys grandis</i>     | mammals   | scotopic | ADW |
| <i>Orthogeomys heterodus</i>   | mammals   | mesopic  | ADW |
| <i>Orycteropus afer</i>        | mammals   | scotopic | ADW |
| <i>Oryctolagus cuniculus</i>   | mammals   | scotopic | ADW |
| <i>Oryx gazella</i>            | mammals   | mesopic  | ADW |
| <i>Oryx leucoryx</i>           | mammals   | photopic | S3  |
| <i>Oryzomys galapagoensis</i>  | mammals   | scotopic | ADW |
| <i>Oryzorictes hova</i>        | mammals   | scotopic | ADW |
| <i>Otaria flavescens</i>       | mammals   | photopic | ADW |
| <i>Otocyon megalotis</i>       | mammals   | mesopic  | ADW |
| <i>Otolemur crassicaudatus</i> | mammals   | scotopic | ADW |
| <i>Otolemur garnettii</i>      | mammals   | scotopic | ADW |
| <i>Otus asio</i>               | avians    | scotopic | S2  |
| <i>Otus kennicottii</i>        | avians    | scotopic | ADW |
| <i>Otus trichopsis</i>         | avians    | scotopic | ADW |
| <i>Ovibos moschatus</i>        | mammals   | photopic | ADW |
| <i>Ovis ammon</i>              | mammals   | photopic | ADW |
| <i>Ovis aries orientalis</i>   | mammals   | mesopic  | S3  |
| <i>Ovis aries vignei</i>       | mammals   | photopic | ADW |
| <i>Ovis canadensis</i>         | mammals   | photopic | ADW |
| <i>Oxyura jamaicensis</i>      | avians    | photopic | ADW |
| <i>Pachyornis mappini</i>      | avians    | photopic | ADW |
| <i>Pachyuromys duprasi</i>     | mammals   | scotopic | ADW |
| <i>Paguma larvata</i>          | mammals   | scotopic | ADW |
| <i>Pan paniscus</i>            | mammals   | photopic | ADW |
| <i>Pan troglodytes</i>         | mammals   | photopic | ADW |
| <i>Pandion haliaetus</i>       | avians    | photopic | ADW |
| <i>Panthera leo</i>            | mammals   | scotopic | ADW |
| <i>Panthera onca</i>           | mammals   | mesopic  | ADW |

|                                  |         |          |     |
|----------------------------------|---------|----------|-----|
| <i>Panthera pardus</i>           | mammals | scotopic | ADW |
| <i>Panthera tigris</i>           | mammals | mesopic  | ADW |
| <i>Papio anubis</i>              | mammals | photopic | ADW |
| <i>Papio cynocephalus</i>        | mammals | photopic | ADW |
| <i>Papio hamadryas</i>           | mammals | photopic | ADW |
| <i>Papio papio</i>               | mammals | photopic | ADW |
| <i>Papio ursinus</i>             | mammals | photopic | ADW |
| <i>Pappogeomys bulleri</i>       | mammals | mesopic  | ADW |
| <i>Parabuteo unicinctus</i>      | avians  | photopic | ADW |
| <i>Paradipus ctenodactylus</i>   | mammals | scotopic | ADW |
| <i>Paraechinus aethiopicus</i>   | mammals | scotopic | ADW |
| <i>Paraechinus micropus</i>      | mammals | scotopic | ADW |
| <i>Parantechinus apicalis</i>    | mammals | mesopic  | ADW |
| <i>Paraxerus flavovittis</i>     | mammals | photopic | ADW |
| <i>Pardofelis marmorata</i>      | mammals | mesopic  | ADW |
| <i>Parus bicolor</i>             | avians  | photopic | ADW |
| <i>Parus carolinensis</i>        | avians  | photopic | ADW |
| <i>Passer domesticus</i>         | avians  | photopic | ADW |
| <i>Passerella iliaca</i>         | avians  | photopic | S2  |
| <i>Passerina cyanea</i>          | avians  | photopic | ADW |
| <i>Pavo pavo</i>                 | avians  | photopic | S2  |
| <i>Pecari tajacu</i>             | mammals | mesopic  | ADW |
| <i>Pelecanoides magellani</i>    | avians  | mesopic  | ADW |
| <i>Pelecanoides urinatrix</i>    | avians  | mesopic  | ADW |
| <i>Pelecanus erythrorhynchos</i> | avians  | photopic | ADW |
| <i>Pelecanus philippensis</i>    | avians  | photopic | ADW |
| <i>Pentalagus furnessi</i>       | mammals | scotopic | ADW |
| <i>Peponocephala electra</i>     | mammals | photopic | ADW |
| <i>Perdix perdix</i>             | avians  | mesopic  | S2  |
| <i>Perisoreus canadensis</i>     | avians  | photopic | S2  |
| <i>Perodicticus potto</i>        | mammals | scotopic | ADW |
| <i>Perognathus amplus</i>        | mammals | scotopic | ADW |
| <i>Perognathus fasciatus</i>     | mammals | scotopic | ADW |
| <i>Perognathus flavescens</i>    | mammals | scotopic | ADW |
| <i>Peromyscus attwateri</i>      | mammals | scotopic | ADW |
| <i>Peromyscus aztecus</i>        | mammals | scotopic | ADW |
| <i>Peromyscus boylii</i>         | mammals | scotopic | ADW |
| <i>Peromyscus californicus</i>   | mammals | scotopic | ADW |
| <i>Peromyscus eremicus</i>       | mammals | scotopic | ADW |
| <i>Peromyscus gossypinus</i>     | mammals | scotopic | ADW |
| <i>Peromyscus keeni</i>          | mammals | scotopic | ADW |
| <i>Peromyscus leucopus</i>       | mammals | scotopic | ADW |
| <i>Peromyscus maniculatus</i>    | mammals | scotopic | ADW |

|                                  |           |          |     |
|----------------------------------|-----------|----------|-----|
| <i>Peromyscus polionotus</i>     | mammals   | scotopic | ADW |
| <i>Peromyscus truei</i>          | mammals   | scotopic | ADW |
| <i>Peropteryx kappleri</i>       | mammals   | scotopic | ADW |
| <i>Peropteryx macrotis</i>       | mammals   | scotopic | ADW |
| <i>Petaurillus hosei</i>         | mammals   | scotopic | ADW |
| <i>Petaurista elegans</i>        | mammals   | scotopic | ADW |
| <i>Petaurista leucogenys</i>     | mammals   | scotopic | ADW |
| <i>Petauroides volans</i>        | mammals   | scotopic | ADW |
| <i>Petrochelidon pyrrhonata</i>  | avians    | photopic | S2  |
| <i>Petrodromus tetradactylus</i> | mammals   | mesopic  | ADW |
| <i>Petrogale assimilis</i>       | mammals   | scotopic | ADW |
| <i>Petrogale concinna</i>        | mammals   | scotopic | ADW |
| <i>Petrogale penicillata</i>     | mammals   | scotopic | ADW |
| <i>Petromus typicus</i>          | mammals   | photopic | ADW |
| <i>Petromyscus collinus</i>      | mammals   | scotopic | ADW |
| <i>Petropseudes dahli</i>        | mammals   | scotopic | ADW |
| <i>Petrosaurus thalassinus</i>   | squamates | photopic | S2  |
| <i>Phacochoerus aethiopicus</i>  | mammals   | photopic | ADW |
| <i>Phacochoerus africanus</i>    | mammals   | photopic | ADW |
| <i>Phalacrocorax aristotelis</i> | avians    | photopic | ADW |
| <i>Phalacrocorax auritus</i>     | avians    | photopic | ADW |
| <i>Phalacrocorax brasilianus</i> | avians    | photopic | ADW |
| <i>Phalaenoptilus nuttallii</i>  | avians    | scotopic | S2  |
| <i>Phalanger lullulae</i>        | mammals   | scotopic | ADW |
| <i>Phalanger orientalis</i>      | mammals   | scotopic | ADW |
| <i>Phaner furcifer</i>           | mammals   | scotopic | ADW |
| <i>Pharomachrus antisianus</i>   | avians    | photopic | ADW |
| <i>Phasianus colchicus</i>       | avians    | photopic | S2  |
| <i>Phelsuma astriata</i>         | squamates | photopic | S2  |
| <i>Phelsuma cepediana</i>        | squamates | photopic | S2  |
| <i>Phelsuma madagascarensis</i>  | squamates | photopic | S2  |
| <i>Phelsuma sundbergi</i>        | squamates | photopic | S2  |
| <i>Pheucticus ludovicianus</i>   | avians    | mesopic  | ADW |
| <i>Pheucticus melanocephalus</i> | avians    | photopic | ADW |
| <i>Philantomba maxwellii</i>     | mammals   | scotopic | ADW |
| <i>Phloeomys cumingi</i>         | mammals   | scotopic | ADW |
| <i>Phodopus campbelli</i>        | mammals   | scotopic | ADW |
| <i>Phoebastria immutabilis</i>   | avians    | mesopic  | S2  |
| <i>Phoebastria nigripes</i>      | avians    | scotopic | ADW |
| <i>Phoebetria palpebrata</i>     | avians    | photopic | ADW |
| <i>Phoenicoparrus andinus</i>    | avians    | photopic | ADW |
| <i>Phoenicopterus chilensis</i>  | avians    | photopic | ADW |
| <i>Phrynocephalus mystaceus</i>  | squamates | photopic | S2  |

|                                 |           |          |     |
|---------------------------------|-----------|----------|-----|
| <i>Phrynosoma cornutum</i>      | squamates | photopic | S2  |
| <i>Phrynosoma mcallii</i>       | squamates | photopic | S2  |
| <i>Phrynosoma solare</i>        | squamates | photopic | S2  |
| <i>Phymaturus palluma</i>       | squamates | photopic | S2  |
| <i>Physignathus cocincinus</i>  | squamates | photopic | S2  |
| <i>Physignathus lesueurii</i>   | squamates | photopic | S2  |
| <i>Pica nuttalli</i>            | avians    | photopic | S2  |
| <i>Picoides pubescens</i>       | avians    | photopic | ADW |
| <i>Piliocolobus rufomitratu</i> | mammals   | photopic | ADW |
| <i>Pinguinus impennis</i>       | avians    | photopic | ADW |
| <i>Pipilo maculatus</i>         | avians    | photopic | S2  |
| <i>Pipistrellus hesperus</i>    | mammals   | mesopic  | ADW |
| <i>Pipistrellus subflavus</i>   | mammals   | scotopic | ADW |
| <i>Piranga rubra</i>            | avians    | photopic | ADW |
| <i>Pithecia monachus</i>        | mammals   | photopic | ADW |
| <i>Pithecophaga jefferyi</i>    | avians    | photopic | ADW |
| <i>Pituophis catenifer</i>      | squamates | mesopic  | ADW |
| <i>Planigale ingrami</i>        | mammals   | scotopic | ADW |
| <i>Planigale tenuirostris</i>   | mammals   | scotopic | ADW |
| <i>Platacanthomys lasiurus</i>  | mammals   | scotopic | ADW |
| <i>Platanista gangetica</i>     | mammals   | mesopic  | ADW |
| <i>Plecotus auritus</i>         | mammals   | scotopic | ADW |
| <i>Plectrophenax nivalis</i>    | avians    | photopic | ADW |
| <i>Plegadis chihi</i>           | avians    | photopic | ADW |
| <i>Pluvialis dominica</i>       | avians    | photopic | ADW |
| <i>Podargus strigoides</i>      | avians    | scotopic | S2  |
| <i>Podiceps auritus</i>         | avians    | photopic | ADW |
| <i>Podilymbus podiceps</i>      | avians    | photopic | ADW |
| <i>Poecile gambeli</i>          | avians    | photopic | S2  |
| <i>Poelagus marjorita</i>       | mammals   | scotopic | ADW |
| <i>Pogona barbarata</i>         | squamates | photopic | S2  |
| <i>Pogona vitticeps</i>         | squamates | photopic | S3  |
| <i>Poiana richardsonii</i>      | mammals   | scotopic | ADW |
| <i>Polihierax semitorquatus</i> | avians    | photopic | S3  |
| <i>Pongo abelii</i>             | mammals   | photopic | ADW |
| <i>Pongo pygmaeus</i>           | mammals   | photopic | ADW |
| <i>Porphyrio hochstetteri</i>   | avians    | photopic | ADW |
| <i>Porphyrio porphyrio</i>      | avians    | photopic | S2  |
| <i>Potamochoerus larvatus</i>   | mammals   | mesopic  | ADW |
| <i>Potamogale velox</i>         | mammals   | scotopic | ADW |
| <i>Potos flavus</i>             | mammals   | scotopic | ADW |
| <i>Presbytis melalophos</i>     | mammals   | photopic | ADW |
| <i>Presbytis thomasi</i>        | mammals   | photopic | ADW |

|                                    |         |          |     |
|------------------------------------|---------|----------|-----|
| <i>Prionodotes maximus</i>         | mammals | scotopic | ADW |
| <i>Prionailurus bengalensis</i>    | mammals | scotopic | ADW |
| <i>Prionailurus iriomotensis</i>   | mammals | mesopic  | ADW |
| <i>Prionailurus planiceps</i>      | mammals | scotopic | ADW |
| <i>Prionailurus rubiginosus</i>    | mammals | scotopic | ADW |
| <i>Prionodon pardicolor</i>        | mammals | scotopic | ADW |
| <i>Probosciger aterrimus</i>       | avians  | photopic | ADW |
| <i>Procapra gutturosa</i>          | mammals | photopic | ADW |
| <i>Procolobus verus</i>            | mammals | photopic | ADW |
| <i>Procyon cancrivorus</i>         | mammals | scotopic | ADW |
| <i>Procyon lotor</i>               | mammals | scotopic | ADW |
| <i>Profelis aurata</i>             | mammals | scotopic | ADW |
| <i>Propithecus diadema</i>         | mammals | photopic | ADW |
| <i>Propithecus perrieri</i>        | mammals | photopic | ADW |
| <i>Propithecus tattersalli</i>     | mammals | photopic | ADW |
| <i>Propithecus verreauxi</i>       | mammals | photopic | ADW |
| <i>Proteles cristata</i>           | mammals | mesopic  | ADW |
| <i>Przewalskium albirostris</i>    | mammals | photopic | ADW |
| <i>Psammomys obesus</i>            | mammals | photopic | ADW |
| <i>Pseudochirops archeri</i>       | mammals | scotopic | ADW |
| <i>Pseudochirulus canescens</i>    | mammals | scotopic | ADW |
| <i>Pseudochirulus herbertensis</i> | mammals | scotopic | ADW |
| <i>Pseudomys higginsi</i>          | mammals | scotopic | ADW |
| <i>Pseudoryx nghetinhensis</i>     | mammals | photopic | ADW |
| <i>Psittacus erithacus</i>         | avians  | photopic | ADW |
| <i>Pteridophora alberti</i>        | avians  | photopic | ADW |
| <i>Pterodroma arminjoniana</i>     | avians  | photopic | ADW |
| <i>Pteroglossus torquatus</i>      | avians  | photopic | ADW |
| <i>Pteromys momonga</i>            | mammals | scotopic | ADW |
| <i>Pteromyscus pulverulentus</i>   | mammals | scotopic | ADW |
| <i>Pteronotus davyi</i>            | mammals | scotopic | ADW |
| <i>Pteronotus parnellii</i>        | mammals | scotopic | ADW |
| <i>Pteropus alecto</i>             | mammals | scotopic | ADW |
| <i>Pteropus dasymallus</i>         | mammals | scotopic | ADW |
| <i>Pteropus giganteus</i>          | mammals | scotopic | S3  |
| <i>Pteropus hypomelanus</i>        | mammals | scotopic | ADW |
| <i>Pteropus livingstonii</i>       | mammals | scotopic | ADW |
| <i>Pteropus mariannus</i>          | mammals | scotopic | ADW |
| <i>Pteropus melanotus</i>          | mammals | photopic | ADW |
| <i>Pteropus poliocephalus</i>      | mammals | scotopic | ADW |
| <i>Pteropus rodricensis</i>        | mammals | scotopic | ADW |
| <i>Pteropus rufus</i>              | mammals | scotopic | ADW |
| <i>Pteropus samoensis</i>          | mammals | photopic | ADW |

|                                    |           |          |     |
|------------------------------------|-----------|----------|-----|
| <i>Pteropus tonganus</i>           | mammals   | scotopic | ADW |
| <i>Ptilinopus iozonus</i>          | avians    | photopic | S3  |
| <i>Ptilopsis granti</i>            | avians    | scotopic | S3  |
| <i>Puffinus auricularis</i>        | avians    | photopic | ADW |
| <i>Pulsatrix perspicillata</i>     | avians    | mesopic  | ADW |
| <i>Puma concolor</i>               | mammals   | scotopic | ADW |
| <i>Puma yagouarouandi</i>          | mammals   | mesopic  | ADW |
| <i>Pusa caspica</i>                | mammals   | photopic | ADW |
| <i>Pygathrix cinerea</i>           | mammals   | photopic | ADW |
| <i>Pygathrix nemaeus</i>           | mammals   | photopic | ADW |
| <i>Pygoscelis adeliae</i>          | avians    | photopic | ADW |
| <i>Python regius</i>               | squamates | scotopic | ADW |
| <i>Python sebae</i>                | squamates | scotopic | ADW |
| <i>Quiscalus quiscula</i>          | avians    | photopic | ADW |
| <i>Rallus limicola</i>             | avians    | mesopic  | S2  |
| <i>Ramphastos sulfuratus</i>       | avians    | photopic | ADW |
| <i>Rangifer tarandus</i>           | mammals   | mesopic  | S3  |
| <i>Raphicerus melanotis</i>        | mammals   | scotopic | ADW |
| <i>Raphicerus sharpei</i>          | mammals   | scotopic | ADW |
| <i>Rattus norvegicus</i>           | mammals   | scotopic | S3  |
| <i>Rattus rattus</i>               | mammals   | scotopic | ADW |
| <i>Redunca arundinum</i>           | mammals   | scotopic | ADW |
| <i>Redunca fulvorufula</i>         | mammals   | scotopic | ADW |
| <i>Regina septemvittata</i>        | squamates | photopic | ADW |
| <i>Regulus calendula</i>           | avians    | photopic | S2  |
| <i>Reithrodon auritus</i>          | mammals   | mesopic  | ADW |
| <i>Reithrodontomys megalotis</i>   | mammals   | scotopic | ADW |
| <i>Reithrodontomys raviventris</i> | mammals   | scotopic | ADW |
| <i>Rhacodactylus auriculatus</i>   | squamates | scotopic | S2  |
| <i>Rhacodactylus ciliatus</i>      | squamates | scotopic | S3  |
| <i>Rhinolophus blasii</i>          | mammals   | scotopic | ADW |
| <i>Rhinolophus capensis</i>        | mammals   | scotopic | ADW |
| <i>Rhinolophus denti</i>           | mammals   | scotopic | ADW |
| <i>Rhinolophus euryale</i>         | mammals   | scotopic | ADW |
| <i>Rhinolophus ferrumequinum</i>   | mammals   | scotopic | ADW |
| <i>Rhinolophus hipposideros</i>    | mammals   | scotopic | ADW |
| <i>Rhinolophus megaphyllus</i>     | mammals   | scotopic | ADW |
| <i>Rhinophylla pumilio</i>         | mammals   | mesopic  | ADW |
| <i>Rhombomys opimus</i>            | mammals   | photopic | ADW |
| <i>Rhynchocyon cirnei</i>          | mammals   | mesopic  | ADW |
| <i>Rhyncholestes raphanurus</i>    | mammals   | scotopic | ADW |
| <i>Riparia riparia</i>             | avians    | photopic | ADW |
| <i>Rucervus duvaucelii</i>         | mammals   | photopic | ADW |

|                                 |           |          |     |
|---------------------------------|-----------|----------|-----|
| <i>Rucervus eldii</i>           | mammals   | mesopic  | S3  |
| <i>Rungwecebus kipunji</i>      | mammals   | photopic | ADW |
| <i>Rusa alfredi</i>             | mammals   | mesopic  | ADW |
| <i>Rusa timorensis</i>          | mammals   | mesopic  | S3  |
| <i>Rusa unicolor</i>            | mammals   | scotopic | ADW |
| <i>Rynchops niger</i>           | avians    | mesopic  | ADW |
| <i>Saccostomus campestris</i>   | mammals   | scotopic | ADW |
| <i>Sagittarius serpentarius</i> | avians    | photopic | ADW |
| <i>Saguinus bicolor</i>         | mammals   | photopic | ADW |
| <i>Saguinus geoffroyi</i>       | mammals   | photopic | ADW |
| <i>Saguinus graellsii</i>       | mammals   | photopic | ADW |
| <i>Saguinus imperator</i>       | mammals   | photopic | ADW |
| <i>Saguinus midas</i>           | mammals   | photopic | ADW |
| <i>Saguinus nigricollis</i>     | mammals   | photopic | ADW |
| <i>Saguinus tripartitus</i>     | mammals   | photopic | ADW |
| <i>Saimiri boliviensis</i>      | mammals   | photopic | ADW |
| <i>Saimiri oerstedii</i>        | mammals   | photopic | ADW |
| <i>Saimiri sciureus</i>         | mammals   | photopic | ADW |
| <i>Saimiri vanzolinii</i>       | mammals   | photopic | ADW |
| <i>Salpingotus pallidus</i>     | mammals   | scotopic | ADW |
| <i>Sarcophilus harrisii</i>     | mammals   | scotopic | ADW |
| <i>Sator angustus</i>           | squamates | photopic | S2  |
| <i>Sauromalus ater</i>          | squamates | photopic | S2  |
| <i>Scalopus aquaticus</i>       | mammals   | scotopic | ADW |
| <i>Scapanus townsendii</i>      | mammals   | scotopic | ADW |
| <i>Sceloporus occidentalis</i>  | squamates | photopic | S3  |
| <i>Sceloporus undulatus</i>     | squamates | photopic | S2  |
| <i>Sciurus carolinensis</i>     | mammals   | photopic | ADW |
| <i>Sciurus niger</i>            | mammals   | photopic | ADW |
| <i>Sciurus oculatus</i>         | mammals   | photopic | ADW |
| <i>Sciurus variegatoides</i>    | mammals   | photopic | ADW |
| <i>Sciurus vulgaris</i>         | mammals   | photopic | ADW |
| <i>Sekeetamys calurus</i>       | mammals   | scotopic | ADW |
| <i>Sericulus chrysocephalus</i> | avians    | photopic | ADW |
| <i>Serinus mozambicus</i>       | avians    | photopic | ADW |
| <i>Sialia sialis</i>            | avians    | photopic | ADW |
| <i>Sigmodon arizonae</i>        | mammals   | mesopic  | ADW |
| <i>Sigmodon hispidus</i>        | mammals   | scotopic | ADW |
| <i>Simias concolor</i>          | mammals   | photopic | ADW |
| <i>Sistrurus catenatus</i>      | squamates | photopic | ADW |
| <i>Sitta canadensis</i>         | avians    | photopic | ADW |
| <i>Sitta carolinensis</i>       | avians    | photopic | ADW |
| <i>Solenodon cubanus</i>        | mammals   | scotopic | ADW |

|                                      |           |          |     |
|--------------------------------------|-----------|----------|-----|
| <i>Solenodon paradoxus</i>           | mammals   | scotopic | ADW |
| <i>Sorex araneus</i>                 | mammals   | scotopic | ADW |
| <i>Sorex arcticus</i>                | mammals   | mesopic  | ADW |
| <i>Sorex cinereus</i>                | mammals   | scotopic | ADW |
| <i>Sorex fumeus</i>                  | mammals   | mesopic  | ADW |
| <i>Sorex gaspensis</i>               | mammals   | mesopic  | ADW |
| <i>Sorex hoyi</i>                    | mammals   | mesopic  | ADW |
| <i>Sorex merriami</i>                | mammals   | scotopic | ADW |
| <i>Sorex palustris</i>               | mammals   | mesopic  | ADW |
| <i>Sorex tundrensis</i>              | mammals   | mesopic  | ADW |
| <i>Sotalia fluviatilis</i>           | mammals   | photopic | ADW |
| <i>Spalax ehrenbergi</i>             | mammals   | photopic | ADW |
| <i>Speothos venaticus</i>            | mammals   | photopic | ADW |
| <i>Spermophilus annulatus</i>        | mammals   | photopic | ADW |
| <i>Spermophilus beecheyi</i>         | mammals   | photopic | ADW |
| <i>Spermophilus brunneus</i>         | mammals   | photopic | ADW |
| <i>Spermophilus elegans</i>          | mammals   | photopic | ADW |
| <i>Spermophilus madrensis</i>        | mammals   | photopic | ADW |
| <i>Spermophilus saturatus</i>        | mammals   | photopic | ADW |
| <i>Spermophilus spilosoma</i>        | mammals   | photopic | ADW |
| <i>Spermophilus tereticaudus</i>     | mammals   | photopic | ADW |
| <i>Spermophilus tridecemlineatus</i> | mammals   | photopic | ADW |
| <i>Spermophilus variegatus</i>       | mammals   | photopic | ADW |
| <i>Spermophilus washingtoni</i>      | mammals   | photopic | ADW |
| <i>Spheniscus mendiculus</i>         | avians    | photopic | ADW |
| <i>Sphiggurus insidiosus</i>         | mammals   | scotopic | ADW |
| <i>Sphiggurus mexicanus</i>          | mammals   | scotopic | ADW |
| <i>Spilocuscus rufoniger</i>         | mammals   | scotopic | ADW |
| <i>Spizella arborea</i>              | avians    | photopic | ADW |
| <i>Spizella passerina</i>            | avians    | photopic | ADW |
| <i>Spizella pusilla</i>              | avians    | photopic | ADW |
| <i>Stagonopleura guttata</i>         | avians    | photopic | ADW |
| <i>Steatornis caripensis</i>         | avians    | scotopic | S2  |
| <i>Stenella longirostris</i>         | mammals   | scotopic | ADW |
| <i>Stercorarius macormicki</i>       | avians    | mesopic  | S2  |
| <i>Stercorarius parasiticus</i>      | avians    | photopic | ADW |
| <i>Sterna caspia</i>                 | avians    | photopic | ADW |
| <i>Sterna forsteri</i>               | avians    | photopic | ADW |
| <i>Storeria dekayi</i>               | squamates | scotopic | ADW |
| <i>Storeria occipitomaculata</i>     | squamates | mesopic  | ADW |
| <i>Streptopelia risoria</i>          | avians    | photopic | S3  |
| <i>Streptoprocne zonaris</i>         | avians    | photopic | S2  |
| <i>Strigocuscus celebensis</i>       | mammals   | scotopic | ADW |



|                                 |         |          |     |
|---------------------------------|---------|----------|-----|
| <i>Strigops habroptila</i>      | avians  | scotopic | ADW |
| <i>Strix aluco</i>              | avians  | mesopic  | S3  |
| <i>Strix occidentalis</i>       | avians  | scotopic | S2  |
| <i>Strix varia</i>              | avians  | scotopic | ADW |
| <i>Strix virgata</i>            | avians  | scotopic | ADW |
| <i>Struthidea cinerea</i>       | avians  | photopic | ADW |
| <i>Struthio camelus</i>         | avians  | mesopic  | S3  |
| <i>Sturnella magna</i>          | avians  | photopic | ADW |
| <i>Sturnus vulgaris</i>         | avians  | photopic | S3  |
| <i>Sula dactylatra</i>          | avians  | photopic | ADW |
| <i>Sula sula</i>                | avians  | mesopic  | ADW |
| <i>Suncus murinus</i>           | mammals | scotopic | ADW |
| <i>Sundasciurus hippurus</i>    | mammals | photopic | ADW |
| <i>Surnia ulula</i>             | avians  | scotopic | ADW |
| <i>Sus celebensis</i>           | mammals | photopic | ADW |
| <i>Sus scrofa</i>               | mammals | scotopic | ADW |
| <i>Sus verrucosus</i>           | mammals | scotopic | ADW |
| <i>Swynnertonia swynnertoni</i> | avians  | photopic | ADW |
| <i>Sylvilagus aquaticus</i>     | mammals | scotopic | ADW |
| <i>Sylvilagus brasiliensis</i>  | mammals | scotopic | ADW |
| <i>Sylvilagus floridanus</i>    | mammals | scotopic | ADW |
| <i>Sylvilagus nuttallii</i>     | mammals | mesopic  | ADW |
| <i>Sylvilagus palustris</i>     | mammals | scotopic | ADW |
| <i>Symphalangus syndactylus</i> | mammals | photopic | ADW |
| <i>Synaptomys cooperi</i>       | mammals | scotopic | ADW |
| <i>Syncerus caffer</i>          | mammals | mesopic  | S3  |
| <i>Tachycineta bicolor</i>      | avians  | photopic | ADW |
| <i>Tadarida aegyptiaca</i>      | mammals | scotopic | ADW |
| <i>Tadarida australis</i>       | mammals | scotopic | ADW |
| <i>Tadarida brasiliensis</i>    | mammals | scotopic | ADW |
| <i>Taeniopygia guttata</i>      | avians  | photopic | ADW |
| <i>Talpa europaea</i>           | mammals | scotopic | ADW |
| <i>Tamandua mexicana</i>        | mammals | mesopic  | ADW |
| <i>Tamias alpinus</i>           | mammals | photopic | ADW |
| <i>Tamias amoenus</i>           | mammals | photopic | ADW |
| <i>Tamias canipes</i>           | mammals | photopic | ADW |
| <i>Tamias cinereicollis</i>     | mammals | photopic | ADW |
| <i>Tamias dorsalis</i>          | mammals | photopic | ADW |
| <i>Tamias merriami</i>          | mammals | photopic | ADW |
| <i>Tamias minimus</i>           | mammals | photopic | ADW |
| <i>Tamias obscurus</i>          | mammals | photopic | ADW |
| <i>Tamias palmeri</i>           | mammals | photopic | ADW |
| <i>Tamias panamintinus</i>      | mammals | photopic | ADW |

|                                             |           |          |     |
|---------------------------------------------|-----------|----------|-----|
| <i>Tamias quadrimaculatus</i>               | mammals   | photopic | ADW |
| <i>Tamias quadrivittatus</i>                | mammals   | photopic | ADW |
| <i>Tamias senex</i>                         | mammals   | photopic | ADW |
| <i>Tamias speciosus</i>                     | mammals   | photopic | ADW |
| <i>Tamias striatus</i>                      | mammals   | photopic | ADW |
| <i>Tamias umbrinus</i>                      | mammals   | photopic | ADW |
| <i>Tamiasciurus douglasii</i>               | mammals   | photopic | ADW |
| <i>Tamiasciurus hudsonicus</i>              | mammals   | photopic | ADW |
| <i>Tapera naevia</i>                        | avians    | photopic | ADW |
| <i>Taphozous mauritanus</i>                 | mammals   | scotopic | ADW |
| <i>Taphozous melanopogon</i>                | mammals   | scotopic | ADW |
| <i>Taphozous melanopogon phillipinensis</i> | mammals   | scotopic | ADW |
| <i>Taphozous nudiventris</i>                | mammals   | scotopic | ADW |
| <i>Tapirus bairdii</i>                      | mammals   | mesopic  | ADW |
| <i>Tapirus indicus</i>                      | mammals   | mesopic  | S3  |
| <i>Tapirus pinchaque</i>                    | mammals   | mesopic  | ADW |
| <i>Tarentola chazaliae</i>                  | squamates | scotopic | S3  |
| <i>Tarsius bancanus</i>                     | mammals   | scotopic | ADW |
| <i>Tarsius dentatus</i>                     | mammals   | scotopic | ADW |
| <i>Tarsius pumilus</i>                      | mammals   | scotopic | ADW |
| <i>Tarsius syrichta</i>                     | mammals   | scotopic | ADW |
| <i>Tarsius tarsier</i>                      | mammals   | scotopic | ADW |
| <i>Tatera indica</i>                        | mammals   | scotopic | ADW |
| <i>Taxidea taxus</i>                        | mammals   | mesopic  | ADW |
| <i>Tayassu pecari</i>                       | mammals   | mesopic  | ADW |
| <i>Teiurus teyua</i>                        | squamates | photopic | S2  |
| <i>Tenrec ecaudatus</i>                     | mammals   | scotopic | ADW |
| <i>Teratoscincus przewalskii</i>            | squamates | scotopic | S2  |
| <i>Teratoscincus sp.</i>                    | squamates | scotopic | S2  |
| <i>Thamnophis butleri</i>                   | squamates | mesopic  | ADW |
| <i>Thamnophis radix</i>                     | squamates | mesopic  | ADW |
| <i>Thamnophis sauritus</i>                  | squamates | photopic | ADW |
| <i>Thamnophis sirtalis</i>                  | squamates | photopic | ADW |
| <i>Theropithecus gelada</i>                 | mammals   | photopic | ADW |
| <i>Thomomys mazama</i>                      | mammals   | scotopic | ADW |
| <i>Threskiornis aethiopicus</i>             | avians    | photopic | ADW |
| <i>Thryonomys swinderianus</i>              | mammals   | scotopic | ADW |
| <i>Thryothorus ludovicianus</i>             | avians    | photopic | ADW |
| <i>Thylogale billardieri</i>                | mammals   | scotopic | ADW |
| <i>Thylogale stigmatica</i>                 | mammals   | mesopic  | ADW |
| <i>Thylogale thetis</i>                     | mammals   | scotopic | ADW |
| <i>Thyroptera discifera</i>                 | mammals   | scotopic | ADW |
| <i>Thyroptera tricolor</i>                  | mammals   | scotopic | ADW |

|                                 |           |          |     |
|---------------------------------|-----------|----------|-----|
| <i>Tiliqua occipitalis</i>      | squamates | photopic | S2  |
| <i>Tlacuatzin canescens</i>     | mammals   | scotopic | ADW |
| <i>Toxostoma rufum</i>          | avians    | photopic | ADW |
| <i>Trachypithecus auratus</i>   | mammals   | photopic | ADW |
| <i>Trachypithecus cristatus</i> | mammals   | photopic | ADW |
| <i>Trachypithecus francoisi</i> | mammals   | photopic | ADW |
| <i>Trachypithecus geei</i>      | mammals   | photopic | ADW |
| <i>Trachypithecus obscurus</i>  | mammals   | photopic | ADW |
| <i>Tragelaphus buxtoni</i>      | mammals   | mesopic  | ADW |
| <i>Tragelaphus eurycerus</i>    | mammals   | photopic | S3  |
| <i>Tragopan satyra</i>          | avians    | photopic | S2  |
| <i>Tragulus napu</i>            | mammals   | scotopic | ADW |
| <i>Tremarctos ornatus</i>       | mammals   | scotopic | ADW |
| <i>Trichosurus arnhemensis</i>  | mammals   | scotopic | ADW |
| <i>Trichosurus caninus</i>      | mammals   | scotopic | ADW |
| <i>Trichys fasciculata</i>      | mammals   | scotopic | ADW |
| <i>Tringa flavipes</i>          | avians    | photopic | ADW |
| <i>Troglodytes aedon</i>        | avians    | photopic | ADW |
| <i>Troglodytes troglodytes</i>  | avians    | photopic | ADW |
| <i>Tropidurus torquatus</i>     | squamates | photopic | S2  |
| <i>Tupaia glis</i>              | mammals   | photopic | ADW |
| <i>Tupaia minor</i>             | mammals   | photopic | ADW |
| <i>Tupaia tana</i>              | mammals   | photopic | ADW |
| <i>Tupinambis merianae</i>      | squamates | photopic | S2  |
| <i>Turdus merula</i>            | avians    | photopic | S2  |
| <i>Turdus migratorius</i>       | avians    | photopic | S2  |
| <i>Tursiops truncatus</i>       | mammals   | mesopic  | ADW |
| <i>Tylonycteris pachypus</i>    | mammals   | scotopic | ADW |
| <i>Tyrannus couchii</i>         | avians    | photopic | ADW |
| <i>Tyrannus melancholicus</i>   | avians    | photopic | ADW |
| <i>Tyrannus tyrannus</i>        | avians    | photopic | ADW |
| <i>Tyto alba</i>                | avians    | scotopic | S3  |
| <i>Uncia uncia</i>              | mammals   | scotopic | ADW |
| <i>Urocyon cinereoargenteus</i> | mammals   | scotopic | ADW |
| <i>Urocyon littoralis</i>       | mammals   | mesopic  | ADW |
| <i>Uromastyx maliensis</i>      | squamates | photopic | S2  |
| <i>Urosaurus ornatus</i>        | squamates | photopic | ADW |
| <i>Ursus americanus</i>         | mammals   | mesopic  | ADW |
| <i>Ursus arctos</i>             | mammals   | mesopic  | S3  |
| <i>Ursus maritimus</i>          | mammals   | photopic | ADW |
| <i>Ursus thibetanus</i>         | mammals   | scotopic | ADW |
| <i>Vampyrum spectrum</i>        | mammals   | scotopic | ADW |
| <i>Varanus beccarii</i>         | squamates | photopic | S2  |

|                                |           |          |     |
|--------------------------------|-----------|----------|-----|
| <i>Varanus gouldii</i>         | squamates | photopic | ADW |
| <i>Varanus komodoensis</i>     | squamates | photopic | ADW |
| <i>Varecia rubra</i>           | mammals   | photopic | ADW |
| <i>Varecia variegata</i>       | mammals   | photopic | ADW |
| <i>Vermivora peregrina</i>     | avians    | photopic | ADW |
| <i>Vipera berus</i>            | squamates | mesopic  | ADW |
| <i>Viverricula indica</i>      | mammals   | scotopic | ADW |
| <i>Volatinia jacarina</i>      | avians    | photopic | ADW |
| <i>Vulpes bengalensis</i>      | mammals   | scotopic | ADW |
| <i>Vulpes cana</i>             | mammals   | scotopic | ADW |
| <i>Vulpes chama</i>            | mammals   | scotopic | ADW |
| <i>Vulpes corsac</i>           | mammals   | mesopic  | ADW |
| <i>Vulpes macrotis</i>         | mammals   | scotopic | ADW |
| <i>Vulpes pallida</i>          | mammals   | scotopic | ADW |
| <i>Vulpes rueppellii</i>       | mammals   | scotopic | ADW |
| <i>Vulpes velox</i>            | mammals   | scotopic | ADW |
| <i>Vulpes vulpes</i>           | mammals   | scotopic | ADW |
| <i>Vulpes zerda</i>            | mammals   | scotopic | ADW |
| <i>Wilsonia pusilla</i>        | avians    | photopic | S2  |
| <i>Xerus erythropus</i>        | mammals   | photopic | ADW |
| <i>Xerus inauris</i>           | mammals   | photopic | ADW |
| <i>Zaedyus pichiy</i>          | mammals   | scotopic | ADW |
| <i>Zapus hudsonius</i>         | mammals   | scotopic | ADW |
| <i>Zapus princeps</i>          | mammals   | scotopic | ADW |
| <i>Zenaida macroura</i>        | avians    | photopic | ADW |
| <i>Zenkerella insignis</i>     | mammals   | photopic | ADW |
| <i>Zonotrichia albicollis</i>  | avians    | photopic | ADW |
| <i>Zonotrichia atricapilla</i> | avians    | photopic | S2  |

---

Abbreviations: ADW, Animal Diversity Web; OIF, ocular image formation

Table S5: Paleolatitude of Examined Fossil Archosaurs

| in [degrees]                             | maximal paleolatitude*                 |
|------------------------------------------|----------------------------------------|
| <b><u>Basal archosaurs</u></b>           |                                        |
| <i>Euparkeria capensis</i>               | 67.4S                                  |
| <i>Proterosuchus vanhoepeni</i>          | 66.4S (Harrysmith Commonage, Induan)   |
| <b><u>Pterosaurs</u></b>                 |                                        |
| <i>Ctenochasma elegans</i>               | 40.1N                                  |
| <i>Ctenochasma taqueti</i>               | 39.6N                                  |
| <i>Pterodactylus antiquus</i>            | 40.1N                                  |
| <i>Pterodaustro guinazui</i>             | 38.3S                                  |
| <i>Rhamphorhynchus muensteri</i>         | 40.2N                                  |
| <i>Scaphognathus crassirostris</i>       | 40.1N                                  |
| <i>Tapejara wellnhoferi</i>              | 12.5S                                  |
| <i>Tupuxuara</i> sp.                     | 12.5S                                  |
| <b><u>Ornithischian dinosaurs</u></b>    |                                        |
| <i>Agilisaurus louderbacki</i>           | 29.4N                                  |
| <i>Corythosaurus casuarius</i>           | 58.2N                                  |
| <i>Prosaurolophus maximus</i>            | 58.1N                                  |
| <i>Protoceratops andrewsi</i>            | 41.8N                                  |
| <i>Psittacosaurus mongoliensis</i>       | 47.0N                                  |
| <i>Saurolophus osborni</i>               | 59.6N                                  |
| <b><u>Basal saurischian dinosaur</u></b> |                                        |
| <i>Herrerasaurus ischigualestensis</i>   | 40.9S                                  |
| <b><u>Sauropodomorph dinosaurs</u></b>   |                                        |
| <i>Diplodocus longus</i>                 | 37.6N ( <i>Diplodocus</i> sp. 41.4)    |
| <i>Lufengosaurus huenei</i>              | 34.4N                                  |
| <i>Nemegtosaurus mongoliensis</i>        | 40.8N                                  |
| <i>Plateosaurus longiceps</i>            | 48.5N                                  |
| <i>Riojasaurus incertus</i>              | 37.0S                                  |
| <b><u>Non-avian theropods</u></b>        |                                        |
| <i>Garudimimus brevipes</i>              | 45.4N                                  |
| <i>Juravenator starki</i>                | 40.2N                                  |
| <i>Megapnosaurus kayentakatae</i>        | 20.6N ( <i>M. rhodoensis</i> 41.4S)    |
| <i>Microraptor gui</i>                   | 44.7N ( <i>M. zhaoianus</i> 46.9N)     |
| <i>Ornithomimus edmontonicus</i>         | 59.4N ( <i>Ornithomimus</i> sp. 62.9N) |
| <i>Sinornithosaurus</i> sp.              | 44.7N                                  |
| <i>Velociraptor mongoliensis</i>         | 41.8N                                  |
| <b><u>Avians</u></b>                     |                                        |

|                                    |                                                |
|------------------------------------|------------------------------------------------|
| <i>Archaeopteryx lithographica</i> | 40.3N                                          |
| <i>Confuciusornis sanctus</i>      | 44.7N ( <i>Confuciusornis</i> sp. up to 46.9N) |
| <i>Sapeornis chaoyangensis</i>     | 46.9N                                          |
| <i>Yixianornis grabaui</i>         | 44.9N                                          |

---

\*extracted from Paleobiology Database Oct. 28, 2010

## Nexus file

**EXT**, external scleral ring diameter; **INT**, internal scleral ring diameter; **m**, mesopic; **OL**, orbit length; **OIF**, ocular image formation; **p**, photopic; **s**, scotopic; **u**, unknown. Dimensions of continuous variables are in [mm].

#NEXUS

[written Wed Nov 03 10:50:24 PDT 2010 by Mesquite version 2.72 (build 527)]

BEGIN TAXA;

TITLE Untitled\_Block\_of\_Taxa;

DIMENSIONS NTAX=197;

TAXLABELS

'Accipiter\_gentilis' 'Accipiter\_striatus' 'Aegolius\_acadicus' 'Aegotheles\_cristatus'  
'Agilisaurus' 'Aix\_sponsa' 'Ameiva\_ameiva' 'Anas\_acuta' 'Anas\_americanus' 'Anas\_platyrhynchos'  
'Anas\_strepera' 'Anolis\_carolinensis' 'Anolis\_sagrei' 'Aphelocorna\_californica' 'Apus\_apus'  
'Aquila\_audax' 'Aquila\_chrysaetos' 'Archaeopteryx' 'Ardea\_herodias' 'Asio\_otus' 'Asturina\_nitida'  
'Athene\_cunicularia' 'Basiliscus\_basiliscus' 'Basiliscus\_vittatus' 'Bubo\_bubo' 'Bubulcus\_ibis'  
'Buteo\_buteo' 'Buteo\_jamaicensis' 'Buteo\_regalis' 'Buteo\_swainsoni' 'Callipepla\_californica'  
'Callipepla\_gambeli' 'Calypte\_anna' 'Caprimulgus\_carolinensis' 'Caprimulgus\_ridgwayi'  
'Caprimulgus\_rufigena' 'Caprimulgus\_vociferus' 'Carpodacus\_purpureus' 'Cathartes\_aura'  
'Cathartes\_guttatus' 'Cathartes\_ustulatus' 'Catoptrophorus\_semipalmatus' 'Chaetura\_pelagica'  
'Chamaeleo\_calypttratus' 'Chamaeleo\_vulgaris' 'Charadrius\_vociferus' 'Chlamydosaurus\_kingii'  
'Chordeiles\_acutipennis' 'Chordeiles\_minor' 'Chrysolophus\_pictus' 'Cnemidophorus\_tigris'  
'Coccothraustes\_vespertinus' 'Coccyzus\_americanus' 'Confuciusornis' 'Cordylus\_giganteus'  
'Corucia\_zebrata' 'Corvus\_brachyrhynchos' 'Corvus\_corax' 'Corythosaurus' 'Crotaphytus\_bicinctores'  
'Ctenochasma\_elegans' 'Ctenochasma\_taqueti' 'Ctenosaura\_clarki' 'Ctenosaura\_hemilopha'  
'Ctenosaura\_pectinata' 'Cygnus\_columbianus' 'Dendragapus\_obscurus' 'Diplodocus' 'Dipsosaurus\_dorsalis'  
'Dromaius\_novaehollandiae' 'Dryocopus\_pileatus' 'Elanus\_leucurus' 'Eublepharis\_maculatus'  
'Eublepharis\_sp' 'Euparkeria' 'Falco\_mexicanus' 'Falco\_rusticolus' 'Falco\_sparverius' 'Falco\_tinnunculus'  
'Furcifer\_cephalolepis' 'Gallinago\_gallinago' 'Gallinula\_chloropus' 'Gallus\_gallus' 'Gambelia\_wislizeni'  
'Garrulus\_glandarius' 'Garudimimus' 'Gekko\_gecko' 'Gekko\_ulikovskii' 'Gerrhosaurus\_major'  
'Glaucidium\_gnomus' 'Herrerasaurus' 'Iguana\_iguana' 'Ixoreus\_naevius' 'Juravenator' 'Lacerta\_sp'  
'Lagopus\_lagopus' 'Lanius\_ludovicianus' 'Larus\_argentatus' 'Larus\_californicus' 'Larus\_canus'  
'Larus\_occidentalis' 'Laterallus\_jamaicensis' 'Lialis\_burtoni' 'Liolaemus\_belli' 'Liolaemus\_bibronni'  
'Liolaemus\_buergeri' 'Lophophorus\_impeyanus' 'Lophura\_bulweri' 'Lufengosaurus' 'Mabuya\_mabuya'  
'Megapnosaurus' 'Meleagris\_gallopavo' 'Meleagris\_ocellata' 'Melospiza\_melodia'  
'Microhierax\_caerulescens' 'Microlophus\_peruvianus' 'Microraptor' 'Milvus\_milvus' 'Nemegtosaurus'  
'Ninox\_novaeseelandiae' 'Numenius\_americanus' 'Nyctibius\_jamaicensis' 'Nyctidromus\_albicollis'  
'Ophisaurus\_ventralis' 'Ornithomimus' 'Otus\_asio' 'Passerella\_iliaca' 'Pavo\_pavo' 'Perdix\_perdix'  
'Perisoreus\_canadensis' 'Petrochelidon\_pyrrhonata' 'Petrosaurus\_thalassinus' 'Phalaenoptilus\_nuttalli'  
'Phasianus\_colchicus' 'Phelsuma\_astriata' 'Phelsuma\_cepediana' 'Phelsuma\_madagascarensis'  
'Phelsuma\_sundbergi' 'Phoebastria\_immutable' 'Phrynosoma\_mystaceus' 'Phrynosoma\_cornutum'  
'Phrynosoma\_mcallii' 'Phrynosoma\_solare' 'Phymaturus\_palluma' 'Physignathus\_cocincinus'  
'Physignathus\_lesueurii' 'Pica\_nuttalli' 'Pipilo\_maculatus' 'Plateosaurus' 'Podargus\_strigoides'  
'Poecile\_gambeli' 'Pogona\_barbarata' 'Pogona\_vitticeps' 'Porphyrio\_porphyrio' 'Prosaurolophus'  
'Proterosuchus' 'Protoceratops' 'Psittacosaurus' 'Pterodactylus\_antiquus' 'Pterodaustro' 'Rallus\_limicola'  
'Regulus\_calendula' 'Rhacodactylus\_auriculatus' 'Rhacodactylus\_ciliatus' 'Rhamphorhynchus\_muensteri'  
'Riojasaurus' 'Sapeornis' 'Sator\_angustus' 'Saurolophus' 'Sauromalus\_ater' 'Scaphognathus'  
'Sceloporus\_occidentalis' 'Sceloporus\_undulatus' 'Sinornithosaurus' 'Steatornis\_caripensis'

'Stercorarius\_maccormicki' 'Streptoprocne\_zonaris' 'Strix\_occidentalis' 'Struthio\_camelus' Tapejara  
'Teius\_teyou' 'Teratoscincus\_przewalskii' 'Teratoscincus\_sp' 'Tiliqua\_occipitalis' 'Tragopan\_satyra'  
'Tropidurus\_torquatus' 'Tupinambis\_merianae' Tupuxuara 'Turdus\_merula' 'Turdus\_migratorius'  
'Tyto\_alba' 'Uromastix\_maliensis' 'Varanus\_beccarii' Velociraptor 'Wilsonia\_pusilla' Yixianornis  
'Zonotrichia\_atricapilla'

;

END;

BEGIN CHARACTERS;

TITLE Character\_Matrix;

DIMENSIONS NCHAR=3;

FORMAT DATATYPE = CONTINUOUS GAP = - MISSING = ?;

CHARSTATELABELS

1 OL,

2 EXT,

3 INT ;

MATRIX

|                           |       |       |       |
|---------------------------|-------|-------|-------|
| 'Accipiter_gentilis'      | 29.1  | 21.3  | 13.08 |
| 'Accipiter_striatus'      | 15.48 | 11.61 | 7.58  |
| 'Aegolius_acadicus'       | 15.47 | 16.18 | 10.56 |
| 'Aegotheles_cristatus'    | 16.79 | 10.96 | 8.65  |
| Agilisaurus               | 32.0  | 26.5  | 11.3  |
| 'Aix_sponsa'              | 20.52 | 14.85 | 9.99  |
| 'Ameiva_ameiva'           | 9.9   | 8.7   | 4.47  |
| 'Anas_acuta'              | 21.62 | 12.25 | 8.23  |
| 'Anas_americana'          | 18.25 | 11.74 | 8.77  |
| 'Anas_platyrhynchos'      | 19.5  | 13.65 | 9.6   |
| 'Anas_strepera'           | 18.82 | 12.56 | 8.6   |
| 'Anolis_carolinensis'     | 5.77  | 3.6   | 1.36  |
| 'Anolis_sagrei'           | 5.12  | 3.88  | 1.85  |
| 'Aphelocorna_californica' | 15.0  | 10.89 | 7.18  |
| 'Apus_apus'               | 12.89 | 10.03 | 5.2   |
| 'Aquila_audax'            | 39.87 | 29.55 | 17.92 |
| 'Aquila_chrysaetos'       | 42.75 | 31.5  | 20.0  |
| Archaeopteryx             | 14.0  | 11.5  | 6.0   |
| 'Ardea_herodias'          | 25.44 | 20.87 | 13.9  |
| 'Asio_otus'               | 18.42 | 19.2  | 11.24 |
| 'Asturina_nitida'         | 28.08 | 22.01 | 12.97 |
| 'Athene_cunicularia'      | 19.5  | 20.09 | 11.0  |
| 'Basiliscus_basiliscus'   | 14.75 | 9.84  | 5.54  |
| 'Basiliscus_vittatus'     | 12.28 | 8.74  | 4.52  |
| 'Bubo_bubo'               | 34.0  | 39.0  | 20.0  |
| 'Bubulcus_ibis'           | 16.39 | 12.82 | 8.53  |
| 'Buteo_buteo'             | 33.0  | 25.0  | 14.25 |
| 'Buteo_jamaicensis'       | 35.16 | 28.3  | 15.82 |
| 'Buteo_regalis'           | 34.3  | 28.8  | 16.2  |
| 'Buteo_swainsoni'         | 31.3  | 23.5  | 13.0  |
| 'Callipepla_californica'  | 13.92 | 9.28  | 6.0   |
| 'Callipepla_gambeli'      | 13.38 | 8.26  | 5.73  |



|                               |       |       |       |
|-------------------------------|-------|-------|-------|
| 'Calypte_anna'                | 5.7   | 4.33  | 3.05  |
| 'Caprimulgus_carolinensis'    | 19.37 | 16.77 | 11.21 |
| 'Caprimulgus_ridgwayi'        | 14.45 | 14.17 | 11.12 |
| 'Caprimulgus_rufigena'        | 14.39 | 13.65 | 9.74  |
| 'Caprimulgus_vociferus'       | 15.54 | 14.04 | 10.46 |
| 'Carpodacus_purpureus'        | 10.16 | 5.81  | 4.03  |
| 'Cathartes_aura'              | 24.08 | 18.34 | 10.28 |
| 'Catharus_guttatus'           | 11.23 | 7.9   | 5.48  |
| 'Catharus_ustulatus'          | 11.65 | 8.39  | 5.48  |
| 'Catoptrophorus_semipalmatus' | 15.7  | 11.8  | 7.7   |
| 'Chaetura_pelagica'           | 11.0  | 8.2   | 4.46  |
| 'Chamaeleo_calypttratus'      | 13.0  | 6.64  | 2.43  |
| 'Chamaeleo_vulgaris'          | 11.98 | 5.36  | 2.1   |
| 'Charadrius_vociferus'        | 14.6  | 10.85 | 7.8   |
| 'Chlamydosaurus_kingii'       | 20.33 | 13.09 | 5.32  |
| 'Chordeiles_acutipennis'      | 14.07 | 13.05 | 9.16  |
| 'Chordeiles_minor'            | 15.23 | 14.14 | 9.0   |
| 'Chrysolophus_pictus'         | 19.77 | 13.21 | 8.74  |
| 'Cnemidophorus_tigris'        | 6.45  | 4.88  | 2.33  |
| 'Coccothraustes_vespertinus'  | 10.07 | 7.7   | 5.6   |
| 'Coccyzus_americanus'         | 12.28 | 10.1  | 6.3   |
| Confuciusornis                | 18.0  | 14.31 | 8.23  |
| 'Cordylus_giganteus'          | 13.24 | 9.7   | 4.2   |
| 'Corucia_zebrata'             | 13.09 | 9.28  | 3.9   |
| 'Corvus_brachyrhynchus'       | 22.95 | 14.1  | 9.51  |
| 'Corvus_corax'                | 30.25 | 18.38 | 11.89 |
| Corythosaurus                 | 146.0 | 63.2  | 45.0  |
| 'Crotaphytes_bicinctores'     | 9.82  | 6.5   | 2.8   |
| 'Ctenochasma_elegans'         | 9.97  | 6.82  | 5.14  |
| 'Ctenochasma_taqueti'         | 27.0  | 18.9  | 11.5  |
| 'Ctenosaura_clarki'           | 10.44 | 7.75  | 3.68  |
| 'Ctenosaura_hemilopha'        | 21.48 | 12.37 | 5.78  |
| 'Ctenosaura_pectinata'        | 13.68 | 8.08  | 4.1   |
| 'Cygnus_columbianus'          | 31.5  | 16.55 | 11.4  |
| 'Dendragapus_obscurus'        | 18.98 | 12.65 | 8.27  |
| Diplodocus                    | 148.0 | 63.0  | 33.0  |
| 'Dipsosaurus_dorsalis'        | 10.16 | 6.92  | 3.16  |
| 'Dromaius_novaehollandiae'    | 45.41 | 32.06 | 22.63 |
| 'Dryocopus_pileatus'          | 17.83 | 15.33 | 8.17  |
| 'Elanus_leucurus'             | 28.11 | 18.91 | 12.3  |
| 'Eublepharis_maculatus'       | 8.26  | 6.78  | 5.06  |
| 'Eublepharis_sp'              | 8.88  | 6.53  | 5.2   |
| Euparkeria                    | 21.1  | 14.35 | 8.82  |
| 'Falco_mexicanus'             | 25.0  | 20.0  | 13.0  |
| 'Falco_rusticolus'            | 29.0  | 20.67 | 12.83 |
| 'Falco_sparverius'            | 17.71 | 13.78 | 8.24  |
| 'Falco_tinnunculus'           | 20.1  | 14.9  | 7.65  |
| 'Furcifer_cephalolepis'       | 9.0   | 3.87  | 1.77  |
| 'Gallinago_gallinago'         | 11.6  | 9.5   | 6.5   |
| 'Gallinula_chloropus'         | 16.2  | 10.02 | 6.4   |
| 'Gallus_gallus'               | 19.23 | 12.85 | 8.33  |

|                            |                   |
|----------------------------|-------------------|
| 'Gambelia_wislizenii'      | 8.5 5.75 2.67     |
| 'Garrulus_glandarius'      | 18.0 11.7 6.9     |
| Garudimimus                | 61.9 41.2 26.8    |
| 'Gekko_gecko'              | 12.04 11.09 8.3   |
| 'Gekko_ulikovskii'         | 8.94 7.69 6.2     |
| 'Gerrhosaurus_major'       | 10.94 10.3 4.57   |
| 'Glaucidium_gnoma'         | 14.63 14.8 6.96   |
| Herrerasaurus              | 69.3 33.94 19.77  |
| 'Iguana_iguana'            | 18.78 12.18 5.74  |
| 'Ixoreus_naevius'          | 12.64 10.13 6.42  |
| Juravenator                | 18.11 15.78 9.75  |
| 'Lacerta_sp'               | 5.7 3.23 1.77     |
| 'Lagopus_lagopus'          | 18.83 10.69 7.05  |
| 'Lanius_ludovicianus'      | 14.0 10.0 6.5     |
| 'Larus_argentatus'         | 21.62 14.08 9.54  |
| 'Larus_californicus'       | 23.58 15.78 10.35 |
| 'Larus_canus'              | 21.7 14.57 10.22  |
| 'Larus_occidentalis'       | 23.6 15.3 10.8    |
| 'Laterallus_jamaicensis'   | 9.69 6.07 3.9     |
| 'Lialis_burtoni'           | 4.38 4.55 2.41    |
| 'Liolaemus_belli'          | 5.65 3.14 1.7     |
| 'Liolaemus_bibronni'       | 6.63 3.7 1.6      |
| 'Liolaemus_buergeri'       | 6.78 4.5 2.1      |
| 'Lophophorus_impeyanus'    | 25.2 17.01 10.01  |
| 'Lophura_bulweri'          | 22.7 15.75 11.01  |
| Lufengosaurus              | 63.0 45.0 26.0    |
| 'Mabuya_mabuya'            | 5.9 4.95 2.05     |
| Megapnosaurus              | 52.0 47.3 32.4    |
| 'Meleagris_gallopavo'      | 25.36 21.83 13.45 |
| 'Meleagris_ocellata'       | 22.05 16.56 10.7  |
| 'Melospiza_melodia'        | 9.25 6.36 4.28    |
| 'Microhierax_caerulescens' | 12.76 9.9 6.46    |
| 'Microlophus_peruvianus'   | 7.33 4.3 1.8      |
| Microraptor                | 19.7 16.2 10.5    |
| 'Milvus_milvus'            | 31.75 21.5 13.0   |
| Nemegtosaurus              | 205.0 88.0 52.2   |
| 'Ninox_novaeseelandiae'    | 24.17 23.73 15.1  |
| 'Numenius_americanus'      | 19.8 14.55 8.85   |
| 'Nyctibius_jamaicensis'    | 28.08 26.3 19.07  |
| 'Nyctidromus_albicollis'   | 15.74 14.84 11.52 |
| 'Ophisaurus_ventralis'     | 5.1 4.2 1.8       |
| Ornithomimus               | 67.0 49.55 31.1   |
| 'Otus_asio'                | 21.7 23.52 12.44  |
| 'Passerella_iliaca'        | 8.15 7.42 4.68    |
| 'Pavo_pavo'                | 24.0 19.43 11.87  |
| 'Perdix_perdix'            | 17.29 10.84 6.32  |
| 'Perisoreus_canadensis'    | 16.59 11.31 7.57  |
| 'Petrochelidon_pyrhronata' | 10.2 6.97 4.34    |
| 'Petrosaurus_thalassinus'  | 11.34 6.96 3.16   |
| 'Phalaenoptilus_nuttallii' | 13.75 12.27 9.4   |
| 'Phasianus_colchicus'      | 28.0 15.75 9.85   |

|                             |       |       |       |
|-----------------------------|-------|-------|-------|
| 'Phelsuma_astriata'         | 4.85  | 3.73  | 2.1   |
| 'Phelsuma_cepediana'        | 4.89  | 4.38  | 2.45  |
| 'Phelsuma_madagascarensis'  | 9.07  | 7.94  | 4.81  |
| 'Phelsuma_sundbergi'        | 6.3   | 5.44  | 3.66  |
| 'Phoebastria_immutabilis'   | 65.05 | 21.24 | 14.56 |
| 'Phrynocephalus_mystaceus'  | 8.29  | 4.7   | 2.09  |
| 'Phrynosoma_cornutum'       | 8.02  | 4.5   | 2.0   |
| 'Phrynosoma_mcallii'        | 7.2   | 3.93  | 1.97  |
| 'Phrynosoma_solare'         | 9.4   | 4.15  | 1.76  |
| 'Phymaturus_palluma'        | 6.95  | 4.15  | 2.13  |
| 'Physignathus_cocincinus'   | 11.44 | 7.53  | 3.24  |
| 'Physignathus_lesueurii'    | 17.21 | 12.78 | 6.39  |
| 'Pica_nuttalli'             | 18.77 | 11.94 | 7.42  |
| 'Pipilo_maculatus'          | 11.35 | 7.58  | 5.48  |
| Plateosaurus                | 75.0  | 48.45 | 25.2  |
| 'Podargus_strigoides'       | 29.1  | 26.13 | 15.41 |
| 'Poecile_gambeli'           | 8.1   | 5.7   | 3.97  |
| 'Pogona_barbarata'          | 12.51 | 7.28  | 2.86  |
| 'Pogona_vitticeps'          | 16.18 | 10.74 | 3.91  |
| 'Porphyrio_porphyrrio'      | 21.72 | 12.69 | 7.92  |
| Prosaurolophus              | 148.0 | 77.6  | 37.4  |
| Proterosuchus               | 50.0  | 26.3  | 13.5  |
| Protoceratops               | 93.0  | 59.0  | 40.5  |
| Psittacosaurus              | 40.2  | 18.7  | 11.52 |
| 'Pterodactylus_antiquus'    | 12.35 | 9.56  | 5.84  |
| Pterodaustro                | 14.0  | 13.45 | 6.73  |
| 'Rallus_limicola'           | 10.9  | 7.06  | 5.06  |
| 'Regulus_calendula'         | 7.7   | 4.84  | 3.55  |
| 'Rhacodactylus_auriculatus' | 9.98  | 8.51  | 6.29  |
| 'Rhacodactylus_ciliatus'    | 9.66  | 7.98  | 6.35  |
| 'Rhamphorhynchus_muensteri' | 25.15 | 16.7  | 11.29 |
| Riojasaurus                 | 67.0  | 48.3  | 23.8  |
| Sapeornis                   | 15.84 | 14.64 | 6.5   |
| 'Sator_angustus'            | 8.2   | 4.8   | 2.0   |
| Saurolophus                 | 269.0 | 92.6  | 51.7  |
| 'Sauromalus_ater'           | 11.66 | 8.03  | 3.69  |
| Scaphognathus               | 25.0  | 18.0  | 10.0  |
| 'Sceloporus_occidentalis'   | 6.17  | 3.23  | 1.61  |
| 'Sceloporus_undulatus'      | 6.48  | 3.7   | 1.7   |
| Sinornithosaurus            | 30.3  | 19.74 | 13.09 |
| 'Steatornis_caripensis'     | 20.6  | 12.65 | 10.88 |
| 'Stercorarius_maccormicki'  | 26.75 | 16.0  | 10.0  |
| 'Streptoprocne_zonaris'     | 16.28 | 12.17 | 7.46  |
| 'Strix_occidentalis'        | 26.59 | 29.8  | 17.92 |
| 'Struthio_camelus'          | 24.6  | 17.03 | 11.58 |
| Tapejara                    | 28.8  | 17.53 | 9.81  |
| 'Teius_teyou'               | 8.59  | 6.52  | 2.99  |
| 'Teratoscincus_przewalskii' | 8.57  | 7.4   | 5.6   |
| 'Teratoscincus_sp'          | 8.11  | 6.77  | 5.16  |
| 'Tiliqua_occipitalis'       | 12.1  | 6.1   | 3.3   |
| 'Tragopan_satyra'           | 23.54 | 16.23 | 10.59 |

```

'Tropidurus_torquatus' 7.76 4.87 2.28
'Tupinambis_merianae' 16.8 9.2 3.86
Tupuxuara 43.25 29.5 16.7
'Turdus_merula' 13.2 10.35 6.3
'Turdus_migratorius' 13.5 10.25 6.55
'Tyto_alba' 19.87 18.0 10.23
'Uromastyx_maliensis' 13.09 8.4 3.23
'Varanus_beccarii' 12.17 7.59 4.0
Velociraptor 39.83 30.2 18.56
'Wilsonia_pusilla' 7.21 5.48 3.71
Yixianornis 10.65 8.31 3.9
'Zonotrichia_atricapilla' 9.89 6.77 4.68

```

;

END;

BEGIN CHARACTERS;

TITLE Character\_Matrix\_OIF;

DIMENSIONS NCHAR=2;

FORMAT DATATYPE = STANDARD GAP = - MISSING = ? SYMBOLS = " 0 1 2 3 4 5 6 7 8

9 A B C D E F G H J K M N P Q R S T U V W X Y Z a b c d e f g h j k m n p q r s t u";

CHARSTATELABELS

1 OIF, 2 EXTINCT ;

MATRIX

```

'Accipiter_gentilis' pN
'Accipiter_striatus' pN
'Aegolius_acadicus' sN
'Aegotheles_cristatus' sN
Agilisaurus uY
'Aix_sponsa' mN
'Ameiva_ameiva' pN
'Anas_acuta' mN
'Anas_americana' mN
'Anas_platyrhynchos' mN
'Anas_strepera' pN
'Anolis_carolinensis' pN
'Anolis_sagrei' pN
'Aphelocorna_californica' pN
'Apus_apus' mN
'Aquila_audax' mN
'Aquila_chrysaetos' mN
Archaeopteryx uY
'Ardea_herodias' mN
'Asio_otus' sN
'Asturina_nitida' pN
'Athene_cunicularia' mN
'Basiliscus_basiliscus' pN
'Basiliscus_vittatus' pN
'Bubo_bubo' sN
'Bubulcus_ibis' pN
'Buteo_buteo' pN

```

'Buteo\_jamaicensis' pN  
 'Buteo\_regalis' mN  
 'Buteo\_swainsoni' pN  
 'Callipepla\_californica' pN  
 'Callipepla\_gambeli' pN  
 'Calypte\_anna' pN  
 'Caprimulgus\_carolinensis' mN  
 'Caprimulgus\_ridgwayi' sN  
 'Caprimulgus\_rufigena' sN  
 'Caprimulgus\_vociferus' sN  
 'Carpodacus\_purpureus' pN  
 'Cathartes\_aura' pN  
 'Catharus\_guttatus' pN  
 'Catharus\_ustulatus' pN  
 'Catoptrophorus\_semipalmatus' mN  
 'Chaetura\_pelagica' pN  
 'Chamaeleo\_calypttratus' pN  
 'Chamaeleo\_vulgaris' pN  
 'Charadrius\_vociferus' mN  
 'Chlamydosaurus\_kingii' pN  
 'Chordeiles\_acutipennis' mN  
 'Chordeiles\_minor' mN  
 'Chrysolophus\_pictus' pN  
 'Cnemidophorus\_tigris' pN  
 'Coccothraustes\_vespertinus' pN  
 'Coccyzus\_americanus' pN  
 Confuciusornis uY  
 'Cordylus\_giganteus' pN  
 'Corucia\_zebrata' sN  
 'Corvus\_brachyrhynchos' pN  
 'Corvus\_corax' pN  
 Corythosaurus uY  
 'Crotaphytes\_bicinctores' pN  
 'Ctenochasma\_elegans' uY  
 'Ctenochasma\_taqueti' uY  
 'Ctenosaura\_clarki' pN  
 'Ctenosaura\_hemilopha' pN  
 'Ctenosaura\_pectinata' pN  
 'Cygnus\_columbianus' mN  
 'Dendragapus\_obscurus' mN  
 Diplodocus uY  
 'Dipsosaurus\_dorsalis' pN  
 'Dromaius\_novaehollandiae' mN  
 'Dryocopus\_pileatus' pN  
 'Elanus\_leucurus' pN  
 'Eublepharis\_maculatus' sN  
 'Eublepharis\_sp' sN  
 Euparkeria uY  
 'Falco\_mexicanus' mN  
 'Falco\_rusticolus' pN  
 'Falco\_sparverius' pN

'Falco\_tinnunculus' pN  
 'Furcifer\_cephalolepis' pN  
 'Gallinago\_gallinago' mN  
 'Gallinula\_chloropus' pN  
 'Gallus\_gallus' pN  
 'Gambelia\_wislizenii' pN  
 'Garrulus\_glandarius' pN  
 Garudimimus uY  
 'Gekko\_gecko' sN  
 'Gekko\_ulikovskii' sN  
 'Gerrhosaurus\_major' pN  
 'Glaucidium\_gnoma' pN  
 Herreriasaurus uY  
 'Iguana\_iguana' pN  
 'Ixoreus\_naevius' pN  
 Juravenator uY  
 'Lacerta\_sp' pN  
 'Lagopus\_lagopus' mN  
 'Lanius\_ludovicianus' pN  
 'Larus\_argentatus' mN  
 'Larus\_californicus' mN  
 'Larus\_canus' mN  
 'Larus\_occidentalis' pN  
 'Laterallus\_jamaicensis' pN  
 'Lialis\_burtoni' sN  
 'Liolaemus\_belli' pN  
 'Liolaemus\_bibronni' pN  
 'Liolaemus\_buergeri' pN  
 'Lophophorus\_impeyanus' pN  
 'Lophura\_bulweri' mN  
 Lufengosaurus uY  
 'Mabuya\_mabuya' pN  
 Megapnosaurus uY  
 'Meleagris\_gallopavo' pN  
 'Meleagris\_ocellata' pN  
 'Melospiza\_melodia' pN  
 'Microhierax\_caerulescens' pN  
 'Microlophus\_peruvianus' pN  
 Microraptor uY  
 'Milvus\_milvus' pN  
 Nemegtosaurus uY  
 'Ninox\_novaeseelandiae' sN  
 'Numenius\_americanus' pN  
 'Nyctibius\_jamaicensis' sN  
 'Nyctidromus\_albicollis' sN  
 'Ophisaurus\_ventralis' pN  
 Ornithomimus uY  
 'Otus\_asio' sN  
 'Passerella\_iliaca' pN  
 'Pavo\_pavo' pN  
 'Perdix\_perdix' mN

'Perisoreus\_canadensis' pN  
 'Petrochelidon\_pyrhronata' pN  
 'Petrosaurus\_thalassinus' pN  
 'Phalaenoptilus\_nuttallii' sN  
 'Phasianus\_colchicus' pN  
 'Phelsuma\_astriata' pN  
 'Phelsuma\_cepediana' pN  
 'Phelsuma\_madagascarensis' pN  
 'Phelsuma\_sundbergi' pN  
 'Phoebastria\_immutabilis' mN  
 'Phrynocephalus\_mystaceus' pN  
 'Phrynosoma\_cornutum' pN  
 'Phrynosoma\_mcallii' pN  
 'Phrynosoma\_solare' pN  
 'Phymaturus\_palluma' pN  
 'Physignathus\_cocincinus' pN  
 'Physignathus\_lesueurii' pN  
 'Pica\_nuttalli' pN  
 'Pipilo\_maculatus' pN  
 Plateosaurus uY  
 'Podargus\_strigoides' sN  
 'Poecile\_gambeli' pN  
 'Pogona\_barbarata' pN  
 'Pogona\_vitticeps' pN  
 'Porphyrio\_porphyrion' pN  
 Prosaurolophus uY  
 Proterosuchus uY  
 Protoceratops uY  
 Psittacosaurus uY  
 'Pterodactylus\_antiquus' uY  
 Pterodaustro uY  
 'Rallus\_limicola' mN  
 'Regulus\_calendula' pN  
 'Rhacodactylus\_auriculatus' sN  
 'Rhacodactylus\_ciliatus' sN  
 'Rhamphorhynchus\_muensteri' uY  
 Riojasaurus uY  
 Sapeornis uY  
 'Sator\_angustus' pN  
 Saurolophus uY  
 'Sauromalus\_ater' pN  
 Scaphognathus uY  
 'Sceloporus\_occidentalis' pN  
 'Sceloporus\_undulatus' pN  
 Sinornithosaurus uY  
 'Steatornis\_caripensis' sN  
 'Stercorarius\_maccormicki' mN  
 'Streptoprocne\_zonaris' pN  
 'Strix\_occidentalis' sN  
 'Struthio\_camelus' mN  
 Tapejara uY

'Teius\_teyou' pN  
'Teratoscincus\_przewalskii' sN  
'Teratoscincus\_sp' sN  
'Tiliqua\_occipitalis' pN  
'Tragopan\_satyra' pN  
'Tropidurus\_torquatus' pN  
'Tupinambis\_merianae' pN  
Tupuxuara uY  
'Turdus\_merula' pN  
'Turdus\_migratorius' pN  
'Tyto\_alba' sN  
'Uromastyx\_maliensis' pN  
'Varanus\_beccarii' pN  
Velociraptor uY  
'Wilsonia\_pusilla' pN  
Yixianornis uY  
'Zonotrichia\_atricapilla' pN

;

END;

BEGIN TREES;

Title Stored\_Trees;

LINK Taxa = Untitled\_Block\_of\_Taxa;

TRANSLATE

1 'Accipiter\_gentilis',  
2 'Accipiter\_striatus',  
3 'Aegolius\_acadicus',  
4 'Aegotheles\_cristatus',  
5 Agilisaurus,  
6 'Aix\_sponsa',  
7 'Ameiva\_ameiva',  
8 'Anas\_acuta',  
9 'Anas\_americana',  
10 'Anas\_platyrhynchos',  
11 'Anas\_strepera',  
12 'Anolis\_carolinensis',  
13 'Anolis\_sagrei',  
14 'Aphelocorna\_californica',  
15 'Apus\_apus',  
16 'Aquila\_audax',  
17 'Aquila\_chrysaetos',  
18 Archaeopteryx,  
19 'Ardea\_herodias',  
20 'Asio\_otus',  
21 'Asturina\_nitida',  
22 'Athene\_cunicularia',  
23 'Basiliscus\_basiliscus',  
24 'Basiliscus\_vittatus',  
25 'Bubo\_bubo',  
26 'Bubulcus\_ibis',



27 'Buteo\_buteo',  
28 'Buteo\_jamaicensis',  
29 'Buteo\_regalis',  
30 'Buteo\_swainsoni',  
31 'Callipepla\_californica',  
32 'Callipepla\_gambeli',  
33 'Calypte\_anna',  
34 'Caprimulgus\_carolinensis',  
35 'Caprimulgus\_ridgwayi',  
36 'Caprimulgus\_rufigena',  
37 'Caprimulgus\_vociferus',  
38 'Carpodacus\_purpureus',  
39 'Cathartes\_aura',  
40 'Catharus\_guttatus',  
41 'Catharus\_ustulatus',  
42 'Catoptrophorus\_semipalmatus',  
43 'Chaetura\_pelagica',  
44 'Chamaeleo\_calyprtratus',  
45 'Chamaeleo\_vulgaris',  
46 'Charadrius\_vociferus',  
47 'Chlamydosaurus\_kingii',  
48 'Chordeiles\_acutipennis',  
49 'Chordeiles\_minor',  
50 'Chrysolophus\_pictus',  
51 'Cnemidophorus\_tigris',  
52 'Coccothraustes\_vespertinus',  
53 'Coccyzus\_americanus',  
54 Confuciusornis,  
55 'Cordylus\_giganteus',  
56 'Corucia\_zebrata',  
57 'Corvus\_brachyrhynchos',  
58 'Corvus\_corax',  
59 Corythosaurus,  
60 'Crotaphytes\_bicinctores',  
61 'Ctenochasma\_elegans',  
62 'Ctenochasma\_taqueti',  
63 'Ctenosaura\_clarki',  
64 'Ctenosaura\_hemilopha',  
65 'Ctenosaura\_pectinata',  
66 'Cygnus\_columbianus',  
67 'Dendragapus\_obscurus',  
68 Diplodocus,  
69 'Dipsosaurus\_dorsalis',  
70 'Dromaius\_novaehollandiae',  
71 'Dryocopus\_pileatus',  
72 'Elanus\_leucurus',  
73 'Eublepharis\_maculatus',  
74 'Eublepharis\_sp',  
75 Euparkeria,  
76 'Falco\_mexicanus',  
77 'Falco\_rusticolus',

78 'Falco\_sparverius',  
79 'Falco\_tinnunculus',  
80 'Furcifer\_cephalolepis',  
81 'Gallinago\_gallinago',  
82 'Gallinula\_chloropus',  
83 'Gallus\_gallus',  
84 'Gambelia\_wislizenii',  
85 'Garrulus\_glandarius',  
86 'Garudimimus',  
87 'Gekko\_gecko',  
88 'Gekko\_ulikovskii',  
89 'Gerrhosaurus\_major',  
90 'Glaucidium\_gnoma',  
91 'Herrerasaurus',  
92 'Iguana\_iguana',  
93 'Ixoreus\_naevius',  
94 'Juravenator',  
95 'Lacerta\_sp',  
96 'Lagopus\_lagopus',  
97 'Lanius\_ludovicianus',  
98 'Larus\_argentatus',  
99 'Larus\_californicus',  
100 'Larus\_canus',  
101 'Larus\_occidentalis',  
102 'Laterallus\_jamaicensis',  
103 'Lialis\_burtoni',  
104 'Liolaemus\_belli',  
105 'Liolaemus\_bibronni',  
106 'Liolaemus\_buergeri',  
107 'Lophophorus\_impeyanus',  
108 'Lophura\_bulweri',  
109 'Lufengosaurus',  
110 'Mabuya\_mabuya',  
111 'Megapnosaurus',  
112 'Meleagris\_gallopavo',  
113 'Meleagris\_ocellata',  
114 'Melospiza\_melodia',  
115 'Microhierax\_caerulescens',  
116 'Microlophus\_peruvianus',  
117 'Microraptor',  
118 'Milvus\_milvus',  
119 'Nemegtosaurus',  
120 'Ninox\_novaeseelandiae',  
121 'Numenius\_americanus',  
122 'Nyctibius\_jamaicensis',  
123 'Nyctidromus\_albicollis',  
124 'Ophisaurus\_ventralis',  
125 'Ornithomimus',  
126 'Otus\_asio',  
127 'Passerella\_iliaca',  
128 'Pavo\_pavo',

129 'Perdix\_perdix',  
130 'Perisoreus\_canadensis',  
131 'Petrochelidon\_pyrrhonata',  
132 'Petrosaurus\_thalassinus',  
133 'Phalaenoptilus\_nuttallii',  
134 'Phasianus\_colchicus',  
135 'Phelsuma\_astriata',  
136 'Phelsuma\_cepediana',  
137 'Phelsuma\_madagascarensis',  
138 'Phelsuma\_sundbergi',  
139 'Phoebastria\_immutabilis',  
140 'Phrynocephalus\_mystaceus',  
141 'Phrynosoma\_cornutum',  
142 'Phrynosoma\_mcallii',  
143 'Phrynosoma\_solare',  
144 'Phymaturus\_palluma',  
145 'Physignathus\_cocincinus',  
146 'Physignathus\_lesueurii',  
147 'Pica\_nuttalli',  
148 'Pipilo\_maculatus',  
149 Plateosaurus,  
150 'Podargus\_strigoides',  
151 'Poecile\_gambeli',  
152 'Pogona\_barbarata',  
153 'Pogona\_vitticeps',  
154 'Porphyrio\_porphyrion',  
155 Prosaurolophus,  
156 Proterosuchus,  
157 Protoceratops,  
158 Psittacosaurus,  
159 'Pterodactylus\_antiquus',  
160 Pterodaustro,  
161 'Rallus\_limicola',  
162 'Regulus\_calendula',  
163 'Rhacodactylus\_auriculatus',  
164 'Rhacodactylus\_ciliatus',  
165 'Rhamphorhynchus\_muensteri',  
166 Riojasaurus,  
167 Sapeornis,  
168 'Sator\_angustus',  
169 Saurolophus,  
170 'Sauromalus\_ater',  
171 Scaphognathus,  
172 'Sceloporus\_occidentalis',  
173 'Sceloporus\_undulatus',  
174 Sinornithosaurus,  
175 'Steatornis\_caripensis',  
176 'Stercorarius\_maccormicki',  
177 'Streptoprocne\_zonaris',  
178 'Strix\_occidentalis',  
179 'Struthio\_camelus',

- 180 Tapejara,
- 181 'Teius\_teyou',
- 182 'Teratoscincus\_przewalskii',
- 183 'Teratoscincus\_sp',
- 184 'Tiliqua\_occipitalis',
- 185 'Tragopan\_satyra',
- 186 'Tropidurus\_torquatus',
- 187 'Tupinambis\_merianae',
- 188 Tupuxuara,
- 189 'Turdus\_merula',
- 190 'Turdus\_migratorius',
- 191 'Tyto\_alba',
- 192 'Uromastix\_maliensis',
- 193 'Varanus\_beccarii',
- 194 Velociraptor,
- 195 'Wilsonia\_pusilla',
- 196 Yixianornis,
- 197 'Zonotrichia\_atricapilla';

TREE saurian1026 =

```

(((103:68.6,(164:34.3,163:34.3):34.3):76.0,((73:66.95,74:66.95):66.95,((87:35.70666667,88:35.706666
67):35.70666667,(182:35.70666667,183:35.70666667):35.70666667):35.70666667,(136:80.34,(137:53.5
6,(135:26.78,138:26.78):26.78):26.78):10.7):53.3,((89:60.3,55:60.3):110.2,(110:113.6666
666667,(56:56.83333333,184:56.83333333):56.83333333):56.83333333):17.8,((95:169.3,(187:126.975,(
181:84.65,(7:42.325,51:42.325):42.325):42.325):10.4,((193:127.3,124:127.3):39.1,((80:55.6666
666667,(44:27.83333333,45:27.83333333):27.83333333):27.83333333,(140:71.57142857,(192:59.64285
714,(145:47.71428571,(146:35.78571428,(47:23.85714286,(153:11.92857143,152:11.92857143):11.928
57143):11.92857143):11.92857143):11.92857143):11.92857143):60.7,((60:54.075,84:54.
075):54.075,((116:45.0625,186:45.0625):45.0625,((23:36.05,24:36.05):36.05,(69:54.075,(92:18.025,170
:18.025):18.025,(63:18.025,64:18.025,65:18.025):18.025):18.025):18.025):18.025):18.025,((12:
37.8525,13:37.8525):37.8525,(144:50.47,(104:25.235,105:25.235,106:25.235):25.235):25.235,((
141:37.8525,142:37.8525,143:37.8525):37.8525,(132:50.47,168:50.47,(172:25.235,173:25.235):25.235):
25.235):25.235):18.025):22.2):13.3):8.6):9.6):77.0[%triangled = on
],(156:1.3,(75:8.0,((171:10.2,165:10.2):1.0,(159:9.725,((180:12.4,188:12.4):41.75,(160:52.675,(61:5.3,6
2:5.3):1.475):1.475):1.475):1.475):84.05,((157:54.4,158:13.0):47.6,(5:10.4[%selected = on
],(59:13.9,(155:12.9,169:18.0):1.0):87.1):1.0):63.9,((166:13.9,(149:16.9,(109:10.0,(68:10.2,119:90.2):43.
9):16.9):1.0):14.75,(91:11.5,(111:24.0,(94:4.9,(125:34.1,86:10.3):54.466666667,((194:55.4,(117:13.5,17
4:13.5):1.0):26.43333333,(18:5.3,(54:18.0,(167:14.0,(196:13.0,(70:59.5,179:59.5):59.5,((66:85.52,(6:64.1
4,(9:21.38,11:21.38):21.38,(10:21.38,8:21.38):21.38):21.38):21.38):21.38,((31:31.2,32:31.2):31.2,((83:2
4.96,128:24.96):24.96,((185:18.72,107:18.72):18.72,((67:12.48,96:12.48):12.48,(113:12.48,112:12.48):1
2.48,108:24.96,129:24.96,50:24.96,134:24.96):12.48):12.48):12.48):44.5):1.25,((175:30.45,122:30.45):3
0.45,(150:58.3666666667,((123:44.6666666666,133:44.6666666666,(48:22.3333333333,49:22.33333333
33):22.3333333333,(37:33.5,(34:22.3333333333,(35:11.16666667,36:11.16666667):11.16666667):11.16
666667):11.16666667,(4:53.3,(33:47.5,(177:31.6666666667,(15:15.83333333,43:15.83333
333):15.83333333):15.83333333):5.8):2.5333333333):2.5333333333):2.5333333333):36.4,((53:45.0,(1
02:15.0,154:15.0):15.0,(82:15.0,161:15.0):15.0):15.0,(139:40.0,(26:20.0,19:20.0):20.0):20.0):35.9,(
46:93.1,((121:59.0,(42:29.5,81:29.5):29.5):29.5,(176:68.0,(100:51.0,(101:34.0,(98:17.0,99:17.0):17.0):1
7.0):17.0):20.5):4.6):1.4,((71:74.4,(191:71.1,(178:35.55,126:35.55,120:35.55,25:35.55,20:35.55,3:35.55,
90:35.55,22:35.55):35.55):3.3):3.3,(39:76.3,(72:66.7625,(16:28.6125,17:28.6125):28.6125,(118:47.6875
,(1:19.075,2:19.075):19.075,(21:28.6125,(28:19.075,30:19.075,(27:9.5375,29:9.5375):9.5375):9.5375):9
.5375):9.5375):9.5375):1.4):3.3,((115:54.0,(79:40.5,(78:27.0,(76:13.5,77:13.5):13.5):13.
5):13.5):13.5,(97:24.2,(130:20.1666666667,(14:16.1333333333,(85:12.1,(147:8.0666666666,(57:4.0333

```

3333,58:4.03333333):4.03333333):4.03333333):4.03333333):4.03333333):23.7,((131:39.0,  
151:39.0):1.8,((162:37.8,((189:14.175,190:14.175):14.175,(93:18.9,(40:9.45,41:9.45):9.45):9.45):1.  
4,((38:10.0,52:10.0):10.0,(195:16.7,((197:5.56666667,127:5.56666667):5.56666667,(114:5.56666667,14  
8:5.56666667):5.56666667):5.56666667):3.3):19.2):1.6):7.1):19.6):13.5):1.4):1.4):10.85):10.85):6.  
0[%triangled = on  
]):1.0):4.0):20.8):1.6333333333):1.6333333333):1.6333333333):43.9):28.4):4.25):4.25):4.25):6.0):  
23.9):1.0;

END;

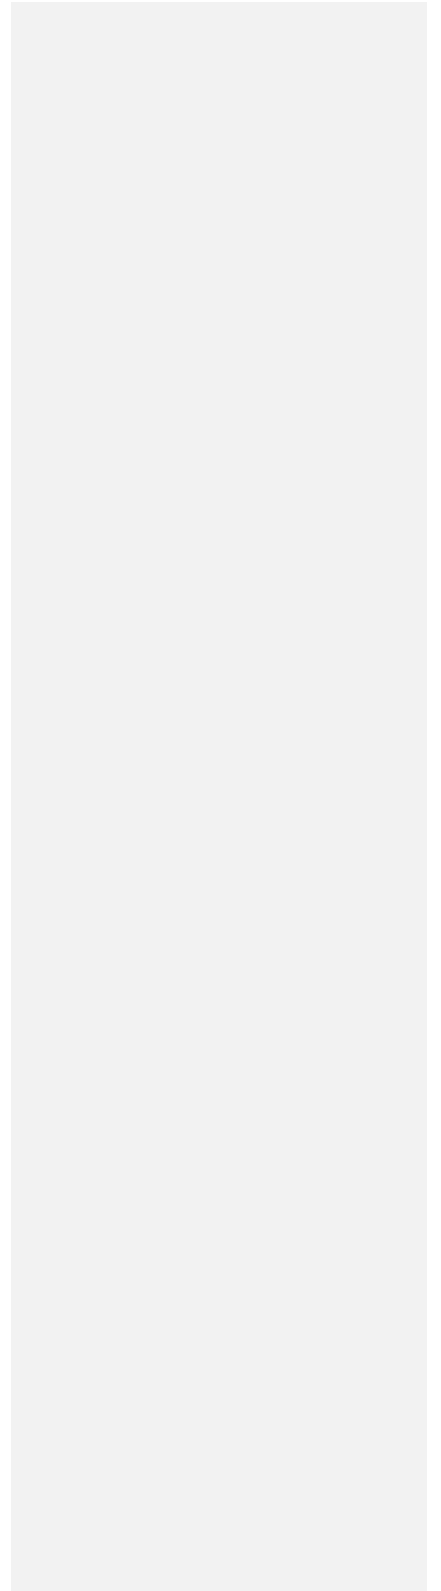

## R Scripts--phylo.fda.R

R Scripts that start from the next paragraph are necessary for running the phylogenetically informed discriminant analysis. Copy them into a text file and name it phylo.fda.R.

```
require(nnet)
require(mda)
require(ape)
require(geiger)
require(lattice)

###-----
### Internal function from the package mda
###-----

"contr.fda" <-
function (p = rep(1, d[1]), contrast.default = contr.helmert(length(p)))
{
  d <- dim(contrast.default)
  sqp <- sqrt(p/sum(p))
  x <- cbind(1, contrast.default) * outer(sqp, rep(1, d[2] +
    1))
  qx <- qr(x)
  J <- qx$rank
  qr.qy(qx, diag(d[1])[, seq(2, J)]/outer(sqp, rep(1, J -
    1)))
}

###-----
### Associated functions modified from the package mda
###-----

"predict.phylo.fda" <-
function (object, newdata, type = c("class", "variates", "posterior",
  "hierarchical", "distances"), prior, dimension = J - 1, ...)
{
  dist <- function(x, mean, m = ncol(mean)) (scale(x, mean,
    FALSE)^2) %*% rep(1, m)
  type <- match.arg(type)
  means <- object$means
  Jk <- dim(means)
  J <- Jk[1]
  k <- Jk[2]
  if (type == "hierarchical") {
    if (missing(dimension))
      dimension.set <- seq(k)
    else {
      dimension.set <- dimension[dimension <= k]
      if (!length(dimension.set))
        dimension.set <- k
      dimension <- max(dimension.set)
    }
  }
}
```

```

else dimension <- min(max(dimension), k)
if (missing(newdata))
  y <- predict(object$fit)
else {
  if (inherits(newdata, "data.frame") || is.list(newdata)) {
    Terms <- delete.response(terms(object))
    attr(Terms, "intercept") <- 0
    newdata <- model.matrix(Terms, newdata)
  }
  y <- predict(object$fit, newdata)
}
y <- y %*% object$theta[, seq(dimension), drop = FALSE]
lambda <- object$values
alpha <- sqrt(lambda[seq(dimension)])
sqima <- sqrt(1 - lambda[seq(dimension)])
newdata <- scale(y, FALSE, sqima * alpha)
if (missing(prior))
  prior <- object$prior
else {
  if (any(prior < 0) | round(sum(prior), 5) != 1)
    stop("innappropriate prior")
}
means <- means[, seq(dimension), drop = FALSE]
switch(type, variates = return(newdata), class = {
  n <- nrow(newdata)
  prior <- 2 * log(prior)
  mindist <- dist(newdata, means[1, ], dimension) - prior[1]
  pclass <- rep(1, n)
  for (i in seq(2, J)) {
    ndist <- dist(newdata, means[i, ], dimension) - prior[i]
    l <- ndist < mindist
    pclass[l] <- i
    mindist[l] <- ndist[l]
  }
  ## 2001-10-27: Need to provide levels or else if we get an error
  ## if the predicted classes do not contain all possible classes.
  ## Reported by Greg Jefferis <jjefferis@stanford.edu>, fix by
  ## Bjorn-Helge Mevik <bjorn-helge.mevik@matforsk.no>.
  return(factor(pclass, levels = seq(J),
    labels = dimnames(means)[[1]]))
}, posterior = {
  pclass <- matrix(0, nrow(newdata), J)
  for (i in seq(J)) pclass[, i] <- exp(-0.5 * dist(newdata, means[i,
    ], dimension)) * prior[i]
  dimnames(pclass) <- list(dimnames(newdata)[[1]], dimnames(means)[[1]])
  return(pclass/drop(pclass %*% rep(1, J)))
}, hierarchical = {
  prior <- 2 * log(prior)
  Pclass <- vector("list", length(dimension.set))
  names(Pclass) <- paste("D", dimension.set, sep = "")
  for (ad in seq(along = dimension.set)) {
    d <- dimension.set[ad]
    dd <- seq(d)

```

```

mindist <- dist(newdata[, dd, drop = FALSE], means[1, dd, drop = FALSE],
  d) - prior[1]
pclass <- rep(1, nrow(newdata))
for (i in seq(2, J)) {
  ndist <- dist(newdata[, dd, drop = FALSE], means[i, dd,
    drop = FALSE], d) - prior[i]
  l <- ndist < mindist
  pclass[l] <- i
  mindist[l] <- ndist[l]
}
levels(pclass) <- dimnames(means)[[1]]
Pclass[[ad]] <- pclass
}
rownames <- dimnames(newdata)[[1]]
if (is.null(rownames))
  rownames <- paste(seq(nrow(newdata)))
return(structure(Pclass, class = "data.frame", row.names = rownames,
  dimensions = dimension.set))
}, distances = {
dclass <- matrix(0, nrow(newdata), J)
for (i in seq(J)) dclass[, i] <- dist(newdata, means[i, ],
  dimension)
dimnames(dclass) <- list(dimnames(newdata)[[1]], dimnames(means)[[1]])
return(dclass)
})
}
"predict.polyreg.modified" <-
function (object, newdata, ...)
{
  if (missing(newdata)) {
    z <- fitted(object)
    if (is.null(z))
      stop("need to supply newdata")
    else return(z)
  }
  degree <- object$degree
  monomial <- object$monomial
  newdata %*% object$coef
}
"polyreg.modified" <-
function (x, y, w, degree = 1, monomial = FALSE, ...)
{
  #x <- polybasis(x, degree, monomial)
  y <- as.matrix(y) # just making sure ...
  if (iswt <- !missing(w)) {
    if (any(w <= 0))
      stop("only positive weights")
    w <- sqrt(w)
    y <- y * w
    x <- x * w
  }
  qrx <- qr(x)
  coef <- as.matrix(qr.coef(qrx, y))
}

```



```

fitted <- qr.fitted(qrx, y)
if ((df <- qrx$rank) < ncol(x))
  coef[qrx$pivot, ] <- coef
if (iswt)
  fitted <- fitted/w
structure(list(fitted.values = fitted, coefficients = coef,
  degree = degree, monomial = monomial, df = df), class = "polyreg.modified")
}

"print.phylo.fda" <-
function(x, ...)
{
  if (!is.null(cl <- x$call)) {
    cat("Call:\n")
    dput(cl)
  }
  cat("\nDimension:", format(x$dimension), "\n")
  cat("\nPercent Between-Group Variance Explained:\n")
  print(round(x$percent, 2))
  error <- x$confusion
  df <- x$fit
  if (!is.null(df))
    df <- df$df
  if (!is.null(df)) {
    cat("\nDegrees of Freedom (per dimension):", format(sum(df)),
      "\n")
  }
  if (!is.null(error)) {
    n <- as.integer(sum(error))
    error <- format(round(attr(error, "error"), 5))
    cat("\nTraining Misclassification Error:", error, "( N =",
      n, ")\n")
  }
  invisible(x)
}

"plot.phylo.fda" <- function(pfdamodel, gfactor=pfdamodel$g, prdfactor=pfdamodel$prd)
{
  pfdavar <- predict(pfdamodel, type="variate")
  lim1x <- c(min(pfdavar[,1]), max(pfdavar[,1]))
  lim1y <- c(min(pfdavar[,2]), max(pfdavar[,2]))
  m1 <- 4; m2 <- 1
  oldpar <-
  par(no.readonly=FALSE); on.exit(par(oldpar)); x11(height=8, width=14); par(mfrow=c(1,2), mar=c(m1,m1,m1,
  m2), oma=c(m2,m2,m2,m2));
  matplot(pfdavar[gfactor==levels(gfactor)[1],1], pfdavar[gfactor==levels(gfactor)[1],2],
  xlab="pFDA1", ylab="pFDA2", xlim=lim1x, ylim=lim1y, pch=1, col=1, main="True
  Classes", sub=paste("lambda = ", pfdamodel$lambda, " intrcpt=", pfdamodel$intercept,
  eqprior=", pfdamodel$eqprior, sep=""))
  for (i in 2:nlevels(gfactor)) matplot(pfdavar[gfactor==levels(gfactor)[i],1],
  pfdavar[gfactor==levels(gfactor)[i],2], add=TRUE, pch=i, col=i)
  legend(min(lim1x), max(lim1y), levels(gfactor), col=1:nlevels(gfactor))
}

```

```

legend(min(lim1x),min(lim1y)+(max(lim1y)-min(lim1y))*0.1,paste("lambda = ",pfdamodel$val,"
intrcpt=",pfdamodel$intercept," eqprior=",pfdamodel$eqprior," ",sep=""))
addEllipseGrp(pfdavar[,1],pfdavar[,2],gfactor, pval=0.95, num=30)
matplot(pfdavar[prdfactor==levels(prdfactor)[1],1], pfdavar[prdfactor==levels(prdfactor)[1],2],
xlab="pFDA1",ylab="pFDA2", xlim=lim1x, ylim=lim1y, pch=1, col=1, main="Predicted
Classes",sub=paste("lambda = ",pfdamodel$val," intercept=",pfdamodel$intercept,"
eqprior=",pfdamodel$eqprior,sep=""))
for (i in 2:nlevels(prdfactor)) matplot(pfdavar[prdfactor==levels(prdfactor)[i],1],
pfdavar[prdfactor==levels(prdfactor)[i],2], add=TRUE, pch=i, col=i)
legend(min(lim1x),max(lim1y),levels(prdfactor), pch=1:nlevels(prdfactor), col=1:nlevels(prdfactor))
legend(min(lim1x),min(lim1y)+(max(lim1y)-min(lim1y))*0.1,paste(levels(prdfactor),"=",pfdamodel$prior,"
",sep=""))
legend(max(lim1x)-(max(lim1x)-min(lim1x))*0.2,max(lim1y),signif(attr(pfdamodel$confusion,"error"),4))
invisible()
}

###-----
### Main pFDA function with training data only
###-----

"phylo.fda" <-function (data,grp,tretre,val=1,treetrans=lambdaTree,
dimension = J - 1, eps = .Machine$double.eps,
keep.fitted = (n * dimension < 1000), method=polyreg.modified,intercept=TRUE,eqprior=FALSE,priin=1)
{
this.call <- match.call()
if(intercept) data <- cbind(Intercept=rep(1,nrow(data)),data)
data <- as.matrix(data)
tretre <- treetrans(tretre,val)
g <- as.factor(grp)
ng <- nlevels(g)
W <- vcov.phylo(tretre)
invW<-solve(W)
invW.eig <- eigen(invW)
N <- invW.eig$vectors %*% diag(sqrt(invW.eig$values)) %*% solve(invW.eig$vectors)
divnum <-det(N)^(1/nrow(N))
N <- N/divnum
DATA <- N%*%data #Rao (4,57); transforming the data to linear
n <- nrow(DATA)
y <- matrix(0,nrow(data),ng)
for (i in 1:nrow(data)){y[i,g[i]] <- 1}
Y <- N%*%y #Dummy matrix with phylo bias removed
x <- DATA
fg <- factor(g)
prior <- colSums(Y)/sum(colSums(Y))
if(eqprior) prior <- c(rep(1/ng,ng))
if(priin != 1) prior<-priin
cnames <- levels(fg)
g <- as.numeric(fg)
J <- length(cnames)
weights <- rep(1, n)
dp <- tapply(weights, g, sum)/n
theta <- contr.helmert(J)
theta <- contr.fda(dp, theta)

```

```

Theta <- Y%%theta #fda p.7, above eq2
fit <- method(x, Theta, weights)
rss <- t(Theta-fit$fitted) %*% (Theta-fit$fitted)
ssm <- t(Theta) %*% fitted(fit)/n
ed <- svd(ssm, nu = 0)
thetan <- ed$v
lambda <- ed$d
lambda[lambda > 1 - eps] <- 1 - eps
discr.eigen <- lambda/(1 - lambda)
pe <- (100 * cumsum(discr.eigen))/sum(discr.eigen)
dimension <- min(dimension, sum(lambda > eps))
if (dimension == 0) {
  warning("degenerate problem; no discrimination")
  return(structure(list(dimension = 0, fit = fit, call = this.call),
    class = "phylo.fda"))
}
thetan <- thetan[, seq(dimension), drop = FALSE]
pe <- pe[seq(dimension)]
alpha <- sqrt(lambda[seq(dimension)])
sqima <- sqrt(1 - lambda[seq(dimension)])
vnames <- paste("v", seq(dimension), sep = "")
means <- scale(theta %*% thetan, FALSE, sqima/alpha)
dimnames(means) <- list(cnames, vnames)
names(lambda) <- c(vnames, rep("", length(lambda) - dimension))
names(pe) <- vnames
frml <- "grp~"
nc <- ncol(data)
varnam <- colnames(data)
for(i in 1:(nc-1)) frml <- paste(frml,varnam[i],"+", sep="")
frml <- paste(frml,varnam[nc], sep="")
frml <- as.formula(frml)
dset <- as.data.frame(cbind(grp,DATA))
Terms <- as.call(fda(formula = frml, data = dset, weights = weights))
obj <- structure(list(percent.explained = pe, values = lambda,
  means = means, theta.mod = thetan, dimension = dimension,
  prior = prior, fit = fit, call = this.call, terms = Terms),
  class = "phylo.fda")
obj$confusion <- confusion(predict(obj), fg)
obj$prd <- predict(obj)
obj$g <- as.factor(grp)
obj$val <- val
obj$rss <- sum(diag(rss))
obj$intercept <- intercept
obj$eqprior <- eqprior
if (!keep.fitted)
  obj$fit$fitted.values <- NULL
obj
}

###-----
### Main pFDA function with training and test data
###-----

```

```

"phylo.fda.pred" <-function (dataA,grpA,taxtaxA,treteA,testlistn,val=1,treetrans=lambdaTree,
  method=polyreg.modified,sbcls=floor(table(grp)/4),
  dimension = J - 1, eps = .Machine$double.eps, keep.fitted = (n * dimension <
1000),intercept=TRUE,eqprior=FALSE,priin=1)
{
## Preparing data
this.call <- match.call()
if(intercept) dataA <- cbind(Intercept=rep(1,nrow(dataA)),dataA)
dataA <- as.data.frame(dataA)
nA <- nrow(dataA)
testlist <- taxtaxA[testlistn]
traininglist <- taxtaxA[-testlistn]
rownames(dataA) <- taxtaxA
tretre <- drop.tip(treteA,testlistn)
grp <- grpA[-testlistn]
grp <- grp[grp %in% names(table(grp))[table(grp) > 0], drop=TRUE]
g <- as.factor(grp)
ng <- nlevels(g)
grpA <- as.factor(grpA)
ntest <- length(testlist)
dataA <- as.matrix(dataA)
tretreA <- treetrans(treteA,val)
W <- vcv.phylo(treteA)
invW<-solve(W)
invW.eig <- eigen(invW)
N <- invW.eig$vectors %*% diag(sqrt(invW.eig$values)) %*% solve(invW.eig$vectors)
divnum <-det(N)^(1/nrow(N))
N <- N/divnum
invN <- solve(N)
y <- matrix(0,nA,nlevels(grpA))
for (i in 1:nA){y[i,grpA[i]] <- 1}
Y <- N%*%y #Dummy matrix with phylo bias removed
Y <- Y[-testlistn,1:ng]
DATAA <- N%*%as.matrix(dataA) #Rao (4,57); transforming the data to linear
DATA <- DATAA[-testlistn,]
DATAtest <- DATAA[testlistn,]
n<-nrow(DATA)
m<-nrow(DATAtest)
x <- DATA
fg <- factor(g)
prior <- colSums(Y)/sum(colSums(Y))
if(eqprior) prior <- c(rep(1/ng,ng))
#prior <- c(0.305, 0.237, 0.458) # Mammalian Prior
#prior <- c(0.288, 0.558, 0.154) # Avian Prior
if(priin != 1) prior<-priin
cnames <- levels(fg)
g <- as.numeric(fg)
J <- length(cnames)
weights <- rep(1, n)
dp <- tapply(weights, g, sum)/n
theta <- contr.helmert(J)
theta <- contr.fda(dp, theta)
Theta <- Y%*%theta #fda p.7, above eq2

```

```

fit <- method(x, Theta, weights)
rss <- t(Theta-fit$fitted) %*% (Theta-fit$fitted)
ssm <- t(Theta) %*% fitted(fit)/n
ed <- svd(ssm, nu = 0)
thetan <- ed$V
lambda <- ed$d
lambda[lambda > 1 - eps] <- 1 - eps
discr.eigen <- lambda/(1 - lambda)
pe <- (100 * cumsum(discr.eigen))/sum(discr.eigen)
dimension <- min(dimension, sum(lambda > eps))
if (dimension == 0) {
  warning("degenerate problem; no discrimination")
  return(structure(list(dimension = 0, fit = fit, call = this.call),
    class = "fda"))
}
thetan <- thetan[, seq(dimension), drop = FALSE]
pe <- pe[seq(dimension)]
alpha <- sqrt(lambda[seq(dimension)])
sqima <- sqrt(1 - lambda[seq(dimension)])
vnames <- paste("v", seq(dimension), sep = "")
means <- scale(theta %*% thetan, FALSE, sqima/alpha)
dimnames(means) <- list(cnames, vnames)
names(lambda) <- c(vnames, rep("", length(lambda) - dimension))
names(pe) <- vnames
frml <- "grp~"
nc <- ncol(dataA)
varnam <- colnames(dataA)
for(i in 1:(nc-1)) frml <- paste(frml,varnam[i],"+", sep="")
frml <- paste(frml,varnam[nc], sep="")
frml <- as.formula(frml)
dset <- as.data.frame(cbind(grp,DATA))
Terms <- as.call(fda(formula = frml, data = dset, weights = weights))
obj <- structure(list(percent.explained = pe, values = lambda,
  means = means, theta.mod = thetan, dimension = dimension,
  prior = prior, fit = fit, call = this.call, terms = Terms),
  class = "phylo.fda")
obj$confusion <- confusion(predict(obj), fg)
obj$prd <- predict(obj)
obj$x<-x
obj$g <- as.factor(grp)
obj$Sval <- val
obj$Rss <- sum(diag(rss))
obj$Sintercept <- intercept
obj$Seqprior <- eqprior
obj$DATAtest <- DATAtest
obj$DATA <- DATA
tpred <- predict(obj,DATAtest)
tpredn <- as.numeric(tpred)
tpred <- as.matrix(tpred)
rownames(tpred) <- testlist
obj$Stestprediction <- tpred
obj$Stestprediction_numeral <- tpredn
if (!keep.fitted)

```

```

    obj$fit$fitted.values <- NULL
  obj
}

###-----
### Function for optimal lambda value search
###-----

"phylo.RSS"<-function (datain,grp,tretre,val=1,treetrans=lambdaTree)
{
  datainO <- as.matrix(datain)
  datainI <- cbind(Intercept=rep(1,nrow(datainO)),datainO)
  tretre <- treetrans(tretre,val)
  n <- nrow(datain)
  g <- as.factor(grp)
  ng <- nlevels(g)
  W <- vcv.phylo(tretre)
  invW<-solve(W)
  y <- matrix(0,n,ng) #Dummy matrix without phylo bias
  for (i in 1:n){y[i,g[i]] <- 1}
  invW.eig <- eigen(invW)
  N <- invW.eig$vectors %*% diag(sqrt(invW.eig$values)) %*% solve(invW.eig$vectors)
  Y <- N %*% y # Pretending that there is no phylogenetic bias in y; otherwise Y <- N%*%y
  DATAI <- N%*%datainI
  # BHAT <- solve(t(DATAI)%*%DATAI)%*%t(DATAI)%*%Y
  # YHAT <- DATAI%*%BHAT
  bhatI <- solve(t(datainI)%*%invW%*%datainI)%*%t(datainI)%*%invW%*%y #Rohlf (9) -- data biased still
  Rao (4,64)
  yhatI <- datainI%*%bhatI #Rohlf (11)
  RSSyI <- t(y-yhatI) %*% invW %*% (y-yhatI) #Martins and Hansen 1997 (9)
  l0I<- lm(Y~DATAI-1)
  # RSSY <- t(Y-YHAT) %*% (Y-YHAT)
  list(RSS=sum(diag(RSSyI)),lLY=logLik(l0I),AICY=AIC(l0I),l0I=l0I)
}

#dataA=XA;grpA=gA;taxtaxA=taxaA;tretreA=treA;testlistn=testtaxn;val=0;treetrans=lambdaTree
"phylo.RSS.pred" <-function (dataA,grpA,taxtaxA,tretreA,testlistn,val=1,treetrans=lambdaTree)
{
  dataA <- as.data.frame(dataA)
  nA <- nrow(dataA)
  testlist <- taxtaxA[testlistn]
  traininglist <- taxtaxA[-testlistn]
  rownames(dataA) <- taxtaxA
  tretre <- drop.tip(tretreA,testlistn)
  grp <- grpA[-testlistn]
  grp <- grp[grp %in% names(table(grp))[table(grp) > 0], drop=TRUE]
  g <- as.factor(grp)
  ng <- nlevels(g)
  grpA <- as.factor(grpA)
  icptA <- rep(1,nA)
  dataA <- cbind(icptA,dataA)
  ntest <- length(testlist)
  tretreA <- treetrans(tretreA,val)
}

```

```

W <- vcov.phylo(treteA)
invW<-solve(W)
invW.eig <- eigen(invW)
N <- invW.eig$eig$values %*% diag(sqrt(invW.eig$values)) %*% solve(invW.eig$eig$eig$vectors)
invN <- solve(N)
y <- matrix(0,nA,nlevels(grpA))
for (i in 1:nA){y[i,grpA[i]] <- 1}
Y <- N%*%y #Dummy matrix with phylo bias removed
Y <- Y[-testlistn,1:ng]
DATAA <- N%*%as.matrix(dataA) #Rao (4,57); transforming the data to linear
DATA <- DATAA[-testlistn,]
BHAT <- solve(t(DATA)%*%DATA)%*%t(DATA)%*%Y
YHAT <- DATA%*%BHAT
l0<- lm(Y~DATA-1)
RSSY <- t(Y-YHAT) %*% (Y-YHAT)
list(RSS=sum(diag(RSSY)),ILY=logLik(l0),AICY=AIC(l0))
}

#measurements=X;grps=g;mytree=tre;idc=filename_stem
"optLambda" <- function(measurements,grps,mytree,idc="default",sstep=0.01,srange=c(0,1),fldr=".")
{
  lambdalist <- seq(min(srange),max(srange),sstep)
  segnum <- length(lambdalist)
  rslt<-matrix(segnum,3)
  colnames(rslt) <- c("Lambda","RSS","logLik")
  for(i in 1:segnum){
    lambdaval <- lambdalist[i]
    rss <- phylo.RSS(X,grps,mytree,val=lambdaval)
    rslt[i,] <- c(lambdaval,rss$RSS,rss$ILY)
  }
  optlambda <- matrix(,1,2);colnames(optlambda)<- c("RSS","logLik")
  optlambda[1,1]<-max(rslt[which(rslt[,2]==min(rslt[,2]),1)])
  optlambda[1,2]<-max(rslt[which(rslt[,3]==max(rslt[,3]),1)])
  x11();matplot(rslt[,1],rslt[,2],type="l",xlab=expression(lambda),ylab="RSS",main="RSS",lty=1,col=1)
  abline(v=optlambda[1,1],col=2,lty=2);mtext(paste("Optimal Lambda = ",optlambda[1,1],sep=""))
  x11();matplot(rslt[,1],rslt[,3],type="l",xlab=expression(lambda),ylab="log
Likelihood",main="logLik",lty=1,col=1)
  abline(v=optlambda[1,2],col=2,lty=2);mtext(paste("Optimal Lambda = ",optlambda[1,2],sep=""))
  pdf(height=11,width=6,file=paste(fldr,idc,".optLambda.pdf",sep="));layout(matrix(c(1,2),2,1))
  matplot(rslt[,1],rslt[,2],type="l",xlab=expression(lambda),ylab="RSS",main="RSS",lty=1,col=1)
  abline(v=optlambda[1,1],col=2,lty=2);mtext(paste("Optimal Lambda = ",optlambda[1,1],sep=""))
  matplot(rslt[,1],rslt[,3],type="l",xlab=expression(lambda),ylab="log
Likelihood",main="logLik",lty=1,col=1)
  abline(v=optlambda[1,2],col=2,lty=2);mtext(paste("Optimal Lambda = ",optlambda[1,2],sep=""))
  dev.off()
  list(optlambda=optlambda,rslt=rslt)
}
# optLambda(X,grps, mytree, "LSSoft2_1000",0.001,c(0,0.2))
# optLambda(X,grps, mytree, "SHF_1000",0.001,c(0,1))

#measurementsA=XA;grpsA=gA;mytreeA=treA;testn=testtaxan;idc=filename_stem
"optLambda.pred" <-
function(measurementsA,grpsA,taxaA,mytreeA,testn,idc="default",sstep=0.01,srange=c(0,1),fldr=".")

```

```

{
  lambdalist <- seq(min(srangle),max(srangle),sstep)
  segnum <- length(lambdalist)
  rslt<-matrix(,segnum+1,3)
  colnames(rslt) <- c("Lambda","RSS","logLik")
  for(i in 1:segnum){
    lambdaval <- lambdalist[i]
    rss <- phylo.RSS.pred(measurementsA,grpsA,taxaA,mytreeA,testn,val=lambdaval)
    rslt[i,] <- c(lambdaval,rss$RSS,rss$ILY)
  }
  optlambda <- matrix(,1,2);colnames(optlambda)<- c("RSS","logLik")
  optlambda[1,1]<-max(rslt[which(rslt[,2]==min(rslt[,2])),1])
  optlambda[1,2]<-max(rslt[which(rslt[,3]==max(rslt[,3])),1])
  x11();matplot(rslt[,1],rslt[,2],type="l",xlab=expression(lambda),ylab="RSS",main="RSS",lty=1,col=1)
  abline(v=optlambda[1,1],col=2,lty=2);mtext(paste("Optimal Lambda = ",optlambda[1,1],sep=""))
  x11();matplot(rslt[,1],rslt[,3],type="l",xlab=expression(lambda),ylab="log
Likelihood",main="logLik",lty=1,col=1)
  abline(v=optlambda[1,2],col=2,lty=2);mtext(paste("Optimal Lambda = ",optlambda[1,2],sep=""))
  pdf(height=11,width=6,file=paste(fldr,idx,".optLambda.pred.pdf",sep="");layout(matrix(c(1.2),2,1)
  matplot(rslt[,1],rslt[,2],type="l",xlab=expression(lambda),ylab="RSS",main="RSS",lty=1,col=1)
  abline(v=optlambda[1,1],col=2,lty=2);mtext(paste("Optimal Lambda = ",optlambda[1,1],sep=""))
  matplot(rslt[,1],rslt[,3],type="l",xlab=expression(lambda),ylab="log
Likelihood",main="logLik",lty=1,col=1)
  abline(v=optlambda[1,2],col=2,lty=2);mtext(paste("Optimal Lambda = ",optlambda[1,2],sep=""))
  dev.off()
  list(optlambda=optlambda,rslt=rslt)
}

###-----
### Utility functions for plotting
###-----

addEllipseSer <- function(x, y, series=2, pval=0.95, num=30)
{
  acc <- num
  alpha <- 1-pval
  vx <- var(x)
  vy <- var(y)
  vxy <- var(x, y)
  lambda <- eigen(var(cbind(x, y)))$values
  a <- sqrt(vxy^2/((lambda[2]-vx)^2+vxy^2))
  b <- (lambda[2]-vx)*a/vxy
  theta <- atan(a/b)
  k <- sqrt(-2*log(alpha))
  l1 <- sqrt(lambda[1])*k
  l2 <- sqrt(lambda[2])*k
#   x2 <- seq(-l1, l1, l1/acc)
  pvec <- 0:num
  x2right <- sin((pi*pvec)/(num*2))*l1
  x2 <- c(-rev(x2right), x2right )
  tmp <- 1-x2^2/l1^2
  y2 <- l2*sqrt(iffelse(tmp < 0, 0, tmp))
  x2 <- c(x2, rev(x2))
}

```



```

    y2 <- c(y2, -rev(y2))
    s0 <- sin(theta)
    c0 <- cos(theta)
    xx <- c0*x2+s0*y2+mean(x)
    yy <- -s0*x2+c0*y2+mean(y)
    #polygon(xx, yy, border=series)
    matplot(xx,yy,xlim=range(x), ylim=range(y), type="l", add=TRUE, col=series, cex=1)
    epp <- cbind(xx,yy)
    return(epp)
}

addEllipseGrp <- function(x,y,grp, pval=0.95, num=30)
{
  gnum <- nlevels(grp)
  gnames <- levels(grp)
  xrange <- cbind(min(x),max(x))
  yrange <- cbind(min(y),max(y))
  dset <- cbind(grp,x,y)
  epnts <- 1:(num+1)*4
  for (i in 1:gnum)
  {
    dset1 <- dset[grp==gnames[i],]
    if(is.vector(dset1)==TRUE){x1 <- dset1[2]; y1 <- dset1[3]} else{x1 <- dset1[,2]; y1 <- dset1[,3]}
    epnts2 <- addEllipseSer(x1,y1,i,pval,num)
    epnts <- cbind(epnts, epnts2)
  }
}

```

## Step-by-Step Guide to R Script Usage

### *Step 1. Prepare your data set.*

Prepare your data using your spreadsheet software. Your data should be similar to below:

| taxon    | measure1 | measure2 | ... | measureN | groups    |
|----------|----------|----------|-----|----------|-----------|
| Gen1_sp1 | 2.8      | 8.13     | ... | 4.53     | nocturnal |
| Gen2_sp2 | 1.41     | 8.34     | ... | 6.56     | unknown   |
| Gen3_sp3 | 2.36     | 8.44     | ... | 3.53     | nocturnal |
| Gen4_sp4 | 1.33     | 7.87     | ... | 3.6      | diurnal   |
| Gen5_sp5 | 2.72     | 6.5      | ... | 5.79     | diurnal   |
| Gen6_sp6 | 4.83     | 9.34     | ... | 4.79     | diurnal   |
| Gen7_sp7 | 1.62     | 8.09     | ... | 4.39     | unknown   |
| ...      | ..       | ...      | ... | ...      | ...       |
| GenM_spM | 4.8      | 9.26     | ... | 5.17     | diurnal   |

**taxon:** Species names or equivalents. **Do not** use space. They should be in the order in which they appear in the phylogeny (i.e., NEXUS file).

**measure1 ... :** Continuous variables representing measurements, such as "eyeball\_diameter" or "lens\_diameter".

**groups:** A categorical variable of interest. In the example above, diel activity pattern is used.

### *Step 2: Start R and get it ready*

Start R, load relevant libraries (especially the packages `ape` and `geiger`), set the working directory if necessary. You also need to load functions in the **phylo.fda.R**, which is supplied earlier in this supporting online material.

### *Step 3. Input Phylogeny*

Use Mesquite or some other software to prepare your phylogenetic tree. Make sure that branch lengths are specified. We recommend using divergence time to calculate branch lengths. Also, it is critical to have the taxa in this file arranged in the same sequence as they appear in the data set in Step 1. To reanalyze our data, use the Nexus file attached in this supporting online material.

Then:

```
treA <- read.nexus("your_file_name.nex")
```

Note that "your\_file\_name" should include the folder location if your NEXUS file is not in the working directory. The current working directory can be found by the command `getwd()`, and set by `setwd()`. Next, check if the tree is binary. If not, force it to be binary.

```
if(!is.binary.tree(treA)) treA <- multi2di(treA, random = TRUE)
```

Finally, if relevant, check if the tree is ultrametric. This would be irrelevant if your tree has fossil taxa.

```
is.ultrametric(treA)
```

#### **Step 4: Input your data and prepare them**

##### **4-1: Copy the data from spreadsheet**

If you are a Windows user, type the following command in R:

```
ddA <- as.data.frame(read.delim("clipboard"))
```

Copy the relevant area of the spreadsheet into the clipboard and then hit enter. If you use Mac OS X or Linux, you need to save the spreadsheet as a .csv file (say, data.csv), move it to the working directory of R (you can find where it is by typing `getwd()` and hitting enter in R), and load the file using the command:

```
ddA <- read.csv("data.csv",quote="")
```

Confirm that the data were correctly read into R by typing:

```
ddA
```

If you are not sure about the taxon order being identical between your tree and data set, you can run the following command:

```
rownames(ddA) <- ddA$taxon  
ddA <- ddA[treA$tip.label,]
```

If you ran these two lines, then make sure that the rows sorted correctly (i.e., type "ddA", hit return, and go through the matrix that is displayed). If the commands above gave you NAs in the data, that means the taxon names do not match exactly between the tree and spreadsheet.

##### **4-2: Extract group categories**

If your spreadsheet had a heading "groups" for categories as in the example in Step 1, then:

```
gA <- ddA$groups
```

##### **4-3: Extract taxon names**

If your spreadsheet had a heading "taxon" for the taxon names, then:

```
taxaA <- ddA$taxon  
rownames(ddA) <- taxaA # for later convenience
```

Make sure that taxon names are in the same order between the spreadsheet and the NEXUS file that will be used in Step 4.

##### **4-4: Extract the measurements and transform(?)**

If your measurements are in the second to fourth columns of ddA, then:

```
XA <- ddA[,2:4]
```

If you need to log transform your measurements, then:

```
XA <- log10(XA)
```

#### 4-5: Identifies the taxa that are to be used in test data

If you identified test data taxa as "unknown" in your dataset, as in the example in Step 1, then use the following commands:

```
testtaxa <- rownames(ddA[gA=="unknown",])
testtaxan <- row(ddA)[gA=="unknown",1]
trainingtaxa <- rownames(ddA[-testtaxan,])
X <- XA[-testtaxan,]
dd <- ddA[-testtaxan,]
g <- gA[-testtaxan]
g <- g[g %in% names(table(g))[table(g) > 0], drop=TRUE]
```

#### 4-6. Extract training data part of the tree

```
tre <- drop.tip(treA, testtaxa)
```

#### Step 5: Find the optimal $\lambda$ value.

You need to find the strength of phylogenetic noise in your data in terms of Pagel's  $\lambda$ . You can find this optimal  $\lambda$  value, as defined in Motani and Schmitz (in press), in two alternative ways. You can choose to find this value based on training data set only, or based on the entire data set. Either way, only the training part of the data set is used for most of the calculations. The only difference would be whether the phylogenetic noise in the training taxa is evaluated with some influence from test data set or not.

#### 5-1. Find the optimal $\lambda$ value using training data only

Run the commands below. It takes time (several minutes?) for the second line to be processed.

```
filename_stem <- "NameOfYourChoice"
o11 <- optLambda(X,g,tre,fdc=filename_stem)
o11$optlambda
```

Take a note of the optimal  $\lambda$  value for "logLik". Also, a PDF file is generated automatically to record the graphs that appear. The file is named according to the filename\_stem that you specify, and saved in the working directory.

#### 5-2. Find the optimal $\lambda$ value using training data, with influence from test data

Run the commands below. It takes time (several minutes?) for the second line to be processed.

```
filename_stem <- "NameOfYourChoice"
o12 <- optLambda.pred(XA,gA,taxaA,treA,testtaxan,fdc=filename_stem)
o12$optlambda
```

Take a note of the optimal  $\lambda$  value for "logLik". Also, a PDF file is generated automatically to record the graphs that appear. The file is named according to the filename\_stem that you specify, and saved in the working directory.

**Comment [L1]:** We can update this once it is published.

## Step 6: Run phylogenetic discriminant analysis

### 6-1. Simplest analysis

```
opt1 <- 0.08 #replace with the optimal lambda value from Step 5
pfda <- phylo.fda.pred(XA,gA,taxaA,treA,testtaxan,val=opt1)
pfda$testprediction
```

### 6-2. Using specific prior probabilities

Prior probabilities have a substantial effect on the outcome of phylogenetic fda. When appropriate values can be estimated, it is best to supply these values. Otherwise, the proportion that is found in the training data set is used by default. Specify the prior probabilities for the categories in *g* (defined in Step 4-5), in the order as they appear in *g* (usually alpha-numerally sorted). The numbers below is based on the estimated proportions among cathemeral, diurnal, and nocturnal species among extant amniotes.

```
pri <- c(0.1427,0.5864,0.2709)
```

Note that *pri* as defined above only works if your *g* has three categories. Run the commands below. Note the slight difference in the second line compared to 6-1. The commands below were written for the data set provided in supporting online material.

```
opt1 <- 0.08 #replace with the optimal lambda value from Step 5
pfda <- phylo.fda.pred(XA,gA,taxaA,treA,testtaxan,val=opt1,priin=pri)
pfda$testprediction
```

You should receive a warning from the second line but you can ignore it.

### 6-3. Finding results across a range of $\lambda$ values

The script below would only work with our data set, which is provided as online supporting material. Given that the estimation of the optimal  $\lambda$  value may involve errors, it is worthwhile to check how changing the  $\lambda$  value may affect the outcome of phylogenetic fda. We first calculate the outcome across a range of  $\lambda$  values, in this case 0, 0.01,0.02,...,1.00. It should take some time to process these commands.

```
lambdalist <- c(0:100)/100
nlambda <- length(lambdalist)
lmbd <- 0
pfp <- phylo.fda.pred(XA,gA,taxaA,treA,testtaxan,lmbd,priin=pri)
outcome<-pfp$testprediction
for(i in 1:(nlambda-1)){
  lmbd <- lambdalist[i+1]
  pfp <- phylo.fda.pred(XA,gA,taxaA,treA,testtaxan,lmbd,priin=pri)
  outcome<-cbind(outcome,pfp$testprediction)
}
```

We then convert the outcome to numbers and add names to rows and columns so that it is easier to plot.

```

outcomen<- matrix(0,nrow(outcome),ncol(outcome))
for(i in 1:ncol(outcome)){
  for(j in 1:nrow(outcome)){
    if(outcome[j,i]=="diurnal") outcomen[j,i]<-3
    if(outcome[j,i]=="cathemeral") outcomen[j,i]<-2
    if(outcome[j,i]=="nocturnal") outcomen[j,i]<-1
  }
}
colnames(outcome) <- lambdalist
colnames(outcomen) <- lambdalist
rownames(outcomen) <- rownames(outcome)

```

You can save the outcome to keep record.

```

dataname <- "DinoPrediction"
dname <- paste("./",dataname,sep="")
dput(outcomen,paste(dname,"_num",sep=""))
dput(outcome,paste(dname,"_char",sep=""))

```

We then make a plot for easier visualization. First, specify the colors to be used for categories, and give the category names to appear on the plot.

```

dapcol <- c("black","blue","yellow")
lgd <- c("Nocturnal","Cathemeral/Crepuscular","Diurnal")

```

If you would rather have a grayscale plot, then use:

```

dapcol <- c("black","gray","white")

```

We then set parameters that are necessary for plotting.

```

yLabels <- rownames(outcomen); xLabels <- colnames(outcomen)
reverse <- nrow(outcomen):1; yLabels <- yLabels[reverse]
routcomen <- outcomen[reverse,]
m1 <- 5; m2 <- 0

```

Then run the following commands to display a plot on screen.

```

x11(width=11,height=8.5)
par(mfrow=c(1,1),mar=c(m1,10,6,m1),oma=c(1,m2,m2,m2))
image(c(1:length(xLabels)), c(1:length(yLabels)), z=t(routcomen),
      col=dapcol,xlab=expression(lambda),ylab="",axes=FALSE, main=
      dataname, sub=paste("Optimum = ", opt1, sep=""))
axis(BELOW<-1, at=1:length(xLabels), labels=xLabels, cex.axis=0.7)
axis(LEFT <-2, at=1:length(yLabels), labels=yLabels, font=3, las=
      HORIZONTAL<-1, cex.axis=0.7)
abline(v=c(which(xLabels==opt1)),col=c(2));
abline(h=c(0:(length(yLabels)+1))-0.5); box()
par(xpd=NA)
legend(x=-20,y=42,lgd,fill=dapcol,bg="white")

```

You can save the plot as a PDF file by running the commands below. You may need to adjust the position of the legend to suit your machine's setting by changing x and y values in the penultimate line.

```

pdf(paste(dname, ".pdf", sep=""), width=11, height=8.5);
par(mfrow=c(1,1), mar=c(m1,10,6,m1), oma=c(1,m2,m2,m2))
image(c(1:length(xLabels)), c(1:length(yLabels)), z=t(routcomen),
      col=dapcol, xlab=expression(lambda), ylab="", axes=FALSE, main=
      dataname, sub=paste("Optimum = ", opt1, sep=""))
axis(BELOW<-1, at=1:length(xLabels), labels=xLabels, cex.axis=0.7)
axis(LEFT <-2, at=1:length(yLabels), labels=yLabels, font=3, las=
      HORIZONTAL<-1, cex.axis=0.7)
abline(v=c(which(xLabels==opt1)), col=c(2));
abline(h=c(0:(length(yLabels)+1))-0.5); box()
par(xpd=NA)
legend(x=-20, y=39, lgd, fill=dapcol, bg="white")
dev.off()

```

### Supporting references and notes

- S1. T. R. Hastie et al., Flexible discriminant analysis by optimal scoring. *J. Am. Stat. Assoc.* **89**, 1 (1994).
- S2. R. Motani, L. Schmitz, Phylogenetic versus functional signals in the evolution of form-function relationships in terrestrial vision. *Evolution* in press.
- S3. L. Schmitz, R. Motani, Morphological differences between eyeballs of nocturnal and diurnal amniotes revisited from optical perspectives of visual environments. *Vision Res.* **50**, 936 (2010).
- S4. M. E. Alfaro et al., Nine exceptional radiations plus high turnover explain species diversity in jawed vertebrates. *Proc. Natl. Acad. Sci.* **106**, 13410 (2009).
- S5. W.N. Charman, in *Evolution of the eye and visual system*, J.R. Cronly-Dillon, R.L. Gregory, Eds. (CRC Press, Inc, Boca Raton, Ann Arbor, Boston, 1991), pp. 82–117.
- S6. E.J. Warrant, in *The senses: A comprehensive reference*, R.H. Masland, T. Albright, Eds. (Academic Press, Oxford, 2008), pp. 53–86.
- S7. U. B. Göhlich, L. M. Chiappe, A new carnivorous dinosaur from the Late Jurassic Solnhofen archipelago. *Nature* **440**, 329 (2006).
- S8. D. B. Weishampel et al., Eds., *The Dinosauria* (University of California Press, Berkeley, Los Angeles, London, 2004).
- S9. D. M. Unwin, in *Evolution and Palaeobiology of Pterosaurs*, E. Buffetaut, J.-M. Mazin, Eds. (Geological Society of London, Special Publications 217, London, 2003) pp.139-190.
- S10. J. A. Clarke et al., Insight into the evolution of avian flight from a new clade of Early Cretaceous ornithurines from China and the morphology of *Yixianornis grabaui*. *J. Anat.* **208**, 287 (2006).
- S11. A. R. I. Cruickshank, in *Studies in Vertebrate Evolution*, K. A. Joysey, T. S. Kemp, Eds. (Oliver and Boyd, Edinburgh, 1972) pp. 89-119.
- S12. S. Jouve, Description of the skull of *Ctenochasma* (Pterosauria) from the latest Jurassic of eastern France, with a taxonomic revision of Tithonian Pterodactyloidea. *J. Vert. Paleontol.* **24**, 542 (2004).
- S13. G. Peng, Jurassic ornithopod *Agilisaurus louderbacki* (Ornithopoda: Fabrosauridae) from Zigong, Sichuan, China. *Vertebrat. Palasiatic.* **30**, 39 (1992).
- S14. B. Brown, E. M. Schlaikjer, The structure and relationships of *Protoceratops*. *Ann. NY. Acad. Sci.* **40**, 133 (1940).
- S15. P. C. Sereno, F. E. Novas, The skull and neck of the basal theropod *Herrerasaurus ischigualastensis*. *J. Vertebr. Paleontol.* **13**, 451 (1993).
- S16. T. Edinger, Über knöcherne Scleralringe. *Zool. Jahrb. Anat. Ontog.* **51**, 163 (1929).
- S17. C. Young, A complete osteology of *Lufengosaurus huenei* Young (gen. et sp. nov.) from Lufeng, Yunnan, China. *Palaeontol. Sin., New Series C* **7**, 1 (1941).
- S18. J. A. Wilson, Redescription of the Mongolian sauropod *Nemegtosaurus mongoliensis* Nowinski (Dinosauria: Saurischia) and comments on Late Cretaceous sauropod diversity. *J. System. Palaeontol.* **3**, 283 (2005).
- S19. F. v. Huene, Vollständige Osteologie eines Plateosauriden aus dem schwäbischen Keuper. *Geol. Paläontol. Abh., Neue Folge* **15**, 129 (1926).
- S20. J. F. Bonaparte, J. A. Pumares, Notas sobre el primer craneo de *Riojasaurus incertus* (Dinosauria, Prosauropoda, Melanorosauridae) del Triásico Superior de La Rioja, Argentina. *Ameghiniana* **32**, 341 (1995).



S22. Y. Kobayashi, R. Barsbold, Reexamination of a primitive ornithomimosaur, *Garudimimus brevipes* Barsbold, 1981 (Dinosauria: Theropoda), from the Late Cretaceous of Mongolia. *Can. J. Earth Sci.* **42**, 1501 (2005).
